# Supplementary material for: Inequalities in the coverage of place of delivery and skilled birth attendance: analyses of cross-sectional surveys in 80 low and middle-income countries
Source: Springer Nature journal article supplement (doi:10.1186/s12978-016-0192-2), 2016-06-17

**Web Table A1: Distribution of delivery assistance according to place of residence in LMICs (n=80 countries)**

| Country          | Place of residence | SBA, institutional |            | Home, SBA |           | Institutional, non-SBA |         | Home, non-SBA |           | p value |
|------------------|--------------------|--------------------|------------|-----------|-----------|------------------------|---------|---------------|-----------|---------|
|                  |                    | N (%)              | 95% CI     | N (%)     | 95% CI    | N (%)                  | 95% CI  | N (%)         | 95% CI    |         |
| Afghanistan 2010 | urban              | 770(64.4)          | 61.7-67.1  | 113(9.5)  | 7.9-11.3  | 18(1.5)                | 1.0-2.4 | 294(24.6)     | 22.2-27.1 | <0.001  |
|                  | rural              | 882(25.3)          | 23.9-26.7  | 241(6.9)  | 6.1-7.8   | 38(1.1)                | 0.8-1.5 | 2329(66.7)    | 65.2-68.3 |         |
| Albania 2008     | urban              | 384(98.7)          | 96.9-99.5  | 3(0.8)    | 0.2-2.4   | 0(0.0)                 | 0.0-0.1 | 2(0.5)        | 0.1-2.0   | 0.019   |
|                  | rural              | 469(95.7)          | 93.5-97.2  | 18(3.7)   | 2.3-5.8   | 0(0.0)                 | 0.0-0.8 | 3(0.6)        | 0.2-1.9   |         |
| Armenia 2010     | urban              | 600(99.3)          | 98.2-99.8  | 2(0.3)    | 0.1-1.3   | 0(0.0)                 | 0.0-0.6 | 2(0.3)        | 0.1-1.3   | 0.329   |
|                  | rural              | 334(100.0)         | 98.9-100.0 | 0(0.0)    | 0.0-1.1   | 0(0.0)                 | 0.0-1.1 | 0(0.0)        | 0.0-1.1   |         |
| Azerbaijan 2006  | urban              | 595(91.1)          | 88.7-93.1  | 30(4.6)   | 3.2-6.5   | 2(0.3)                 | 0.1-1.2 | 26(4.0)       | 2.7-5.8   | <0.001  |
|                  | rural              | 544(72.6)          | 69.3-75.7  | 103(13.8) | 11.5-16.4 | 2(0.3)                 | 0.1-1.1 | 100(13.4)     | 11.1-16.0 |         |
| Bangladesh 2011  | urban              | 755(48.4)          | 46.0-50.9  | 87(5.6)   | 4.5-6.8   | 10(0.6)                | 0.3-1.2 | 707(45.4)     | 42.9-47.8 | <0.001  |
|                  | rural              | 786(23.0)          | 21.6-24.5  | 103(3.0)  | 2.5-3.5   | 6(0.2)                 | 0.1-0.4 | 2521(73.8)    | 72.3-75.2 |         |
| Belarus 2012     | urban              | 987(99.8)          | 99.2-99.9  | 1(0.1)    | 0.0-0.7   | 0(0.0)                 | 0.0-0.4 | 1(0.1)        | 0.0-0.7   | 0.712   |
|                  | rural              | 335(100.0)         | 0.99-100.0 | 0(0.0)    | 0.0-1.1   | 0(0.0)                 | 0.0-1.1 | 0(0.0)        | 0.0-1.1   |         |
| Belize 2011      | urban              | 241(97.6)          | 94.7-98.9  | 2(0.8)    | 0.2-3.2   | 0(0.0)                 | 0.0-1.5 | 4(1.6)        | 0.6-4.2   | 0.001   |
|                  | rural              | 405(89.0)          | 85.8-91.6  | 22(4.8)   | 3.2-7.2   | 5(1.1)                 | 0.5-2.6 | 23(5.1)       | 3.4-7.5   |         |
| Benin 2011       | urban              | 2665(89.6)         | 88.4-90.6  | 19(0.6)   | 0.4-1.0   | 59(2.0)                | 1.5-2.6 | 233(7.8)      | 6.9-8.9   | <0.001  |
|                  | rural              | 3865(78.9)         | 77.8-80.1  | 61(1.3)   | 1.0-1.6   | 260(5.3)               | 4.7-6.0 | 710(14.5)     | 13.5-15.5 |         |
| Bhutan 2010      | urban              | 448(87.6)          | 84.6-90.1  | 4(0.7)    | 0.3-1.9   | 6(1.1)                 | 0.5-2.4 | 59(10.6)      | 8.3-13.4  | <0.001  |
|                  | rural              | 981(51.4)          | 49.2-53.7  | 60(3.1)   | 2.4-4.0   | 13(0.7)                | 0.4-1.2 | 854(44.8)     | 42.5-47.0 |         |
| Bolivia 2008     | urban              | 2397(89.3)         | 88.0-90.4  | 22(0.8)   | 0.5-1.2   | 13(0.5)                | 0.3-0.8 | 253(9.4)      | 8.4-10.6  | <0.001  |
|                  | rural              | 1289(50.8)         | 48.8-52.7  | 168(6.6)  | 5.7-7.6   | 6(0.2)                 | 0.1-0.5 | 1077(42.4)    | 40.5-44.3 |         |

|                        |       |            |           |           |           |          |         |            |           |        |
|------------------------|-------|------------|-----------|-----------|-----------|----------|---------|------------|-----------|--------|
| Bosnia & Herz. 2011    | urban | 242(99.6)  | 97.1-99.9 | 1(0.4)    | 0.1-2.9   | 0(0.0)   | 0.0-1.5 | 0(0.0)     | 0.0-1.5   | 0.689  |
|                        | rural | 437(99.6)  | 98.3-99.9 | 1(0.2)    | 0.0-1.5   | 0(0.0)   | 0.0-0.8 | 1(0.2)     | 0.0-1.5   |        |
| Brazil 2006            | urban | 1872(96.0) | 95.0-96.8 | 5(0.3)    | 0.1-0.6   | 30(1.5)  | 1.1-2.2 | 43(2.2)    | 1.6-3.0   | <0.001 |
|                        | rural | 929(93.2)  | 91.4-94.6 | 4(0.4)    | 0.2-1.1   | 12(1.2)  | 0.7-2.1 | 52(5.2)    | 4.0-6.8   |        |
| Burkina Faso 2010      | urban | 1856(93.4) | 92.2-94.4 | 7(0.4)    | 0.2-0.7   | 5(0.5)   | 0.1-0.6 | 119(6.0)   | 5.0-7.1   | <0.001 |
|                        | rural | 4735(67.5) | 66.4-68.6 | 70(1.0)   | 0.8-1.3   | 12(0.2)  | 0.1-0.3 | 2198(31.3) | 30.3-32.4 |        |
| Burundi 2010           | urban | 745(89.2)  | 86.9-91.2 | 13(1.6)   | 0.9-2.7   | 0(0.0)   | 0.0-0.4 | 77(9.2)    | 7.4-11.4  | <0.001 |
|                        | rural | 2431(62.1) | 60.6-63.6 | 33(0.8)   | 0.6-1.2   | 15(0.4)  | 0.2-0.6 | 1436(36.7) | 35.2-38.2 |        |
| Cambodia 2010          | urban | 1057(83.1) | 80.9-85.1 | 129(10.1) | 8.6-11.9  | 5(0.4)   | 0.2-0.9 | 81(6.4)    | 5.2-7.9   | <0.001 |
|                        | rural | 1907(51.8) | 49.8-53.0 | 537(14.5) | 13.4-15.7 | 10(0.3)  | 0.1-0.5 | 1254(33.8) | 32.3-35.4 |        |
| Cameroon 2011          | urban | 2463(85.1) | 83.7-86.3 | 76(2.6)   | 2.1-3.3   | 10(0.4)  | 0.2-0.6 | 347(12.0)  | 10.8-13.2 | <0.001 |
|                        | rural | 2116(48.8) | 47.3-50.3 | 136(3.1)  | 2.7-3.7   | 13(0.3)  | 0.2-0.5 | 2071(47.8) | 46.3-49.3 |        |
| CAR 2010               | urban | 1025(70.9) | 68.5-73.2 | 99(6.9)   | 5.7-8.3   | 46(3.2)  | 2.4-4.2 | 276(19.1)  | 17.1-21.2 | <0.001 |
|                        | rural | 1108(35.8) | 34.1-37.5 | 190(6.1)  | 5.3-7.0   | 258(8.3) | 7.4-9.4 | 1543(49.8) | 48.0-51.6 |        |
| Chad 2010              | urban | 829(33.8)  | 32.0-35.7 | 308(12.6) | 11.3-13.9 | 18(0.7)  | 0.5-1.2 | 1297(52.9) | 50.9-54.9 | <0.001 |
|                        | rural | 250(6.8)   | 6.0-7.6   | 190(5.1)  | 4.5-5.9   | 13(0.4)  | 0.2-1.6 | 3248(87.8) | 86.7-88.8 |        |
| Comoros 2012           | urban | 600(89.3)  | 86.7-91.4 | 27(4.0)   | 2.8-5.8   | 1(0.2)   | 0.0-1.1 | 44(6.6)    | 4.9-8.7   | <0.001 |
|                        | rural | 900(70.4)  | 67.9-72.9 | 96(7.5)   | 6.2-9.1   | 4(0.3)   | 0.1-0.8 | 278(21.8)  | 19.6-24.1 |        |
| Congo Brazzaville 2011 | urban | 1483(95.7) | 94.6-96.6 | 29(1.9)   | 1.3-2.7   | 4(0.3)   | 0.1-0.7 | 33(2.1)    | 1.5-3.0   | <0.001 |
|                        | rural | 3449(81.4) | 80.2-82.6 | 186(4.4)  | 3.8-5.1   | 14(0.3)  | 0.2-0.6 | 587(13.9)  | 19.6-24.1 |        |
| Congo D.R. 2013        | urban | 3067(90.2) | 89.1-91.1 | 59(1.7)   | 1.3-2.2   | 35(1.0)  | 0.7-1.4 | 240(7.1)   | 6.2-8.0   | <0.001 |
|                        | rural | 5192(64.9) | 63.8-65.9 | 230(2.9)  | 2.5-3.3   | 221(2.8) | 2.4-3.1 | 2358(29.5) | 28.5-30.5 |        |
| Costa Rica 2011        | urban | 426(99.1)  | 97.5-99.7 | 0(0.0)    | 0.0-0.9   | 3(0.7)   | 0.2-2.1 | 1(0.2)     | 0.0-1.6   | 0.007  |
|                        | rural | 408(96.2)  | 93.9-97.7 | 6(1.4)    | 0.6-3.1   | 2(0.5)   | 0.1-1.9 | 8(1.9)     | 0.9-3.7   |        |
|                        | urban | 1297(80.2) | 78.2-82.1 | 33(2.0)   | 1.5-2.9   | 6(0.4)   | 0.2-0.8 | 281(17.38) | 15.6-19.3 | <0.001 |

|                               |       |            |           |           |           |          |         |             |           |        |
|-------------------------------|-------|------------|-----------|-----------|-----------|----------|---------|-------------|-----------|--------|
| Cote d'Ivoire<br>2011         | rural | 1361(42.7) | 41.0-44.4 | 77(2.4)   | 1.9-3.0   | 32(1.0)  | 0.7-1.4 | 1719(53.9)  | 52.2-55.6 |        |
| Dominican<br>Republic<br>2013 | urban | 1525(98.2) | 97.4-98.8 | 5(0.3)    | 0.1-0.8   | 9(0.6)   | 0.3-1.1 | 14(0.9)     | 0.5-1.5   | <0.001 |
|                               | rural | 630(95.2)  | 93.2-96.6 | 5(0.8)    | 0.3-1.8   | 3(0.5)   | 0.1-1.4 | 24(3.6)     | 2.4-5.4   |        |
| Egypt<br>2008                 | urban | 2195(85.5) | 84.1-86.9 | 132(5.1)  | 4.4-6.1   | 6(0.2)   | 0.1-0.5 | 233(9.1)    | 8.0-10.3  | <0.001 |
|                               | rural | 2780(64.5) | 63.1-65.9 | 369(8.6)  | 7.8-9.4   | 10(0.2)  | 0.1-0.4 | 1151(26.7)  | 25.4-28.0 |        |
| Ethiopia<br>2011              | urban | 728(61.2)  | 58.4-63.9 | 19(1.6)   | 1.0-2.5   | 2(0.2)   | 0.0-0.7 | 441(37.1)   | 34.4-39.8 | <0.001 |
|                               | rural | 258(4.7)   | 4.2-5.3   | 40(0.8)   | 0.5-1.0   | 9(0.2)   | 0.1-0.3 | 5204(94.4)  | 93.8-95.6 |        |
| Gabon<br>2012                 | urban | 2193(91.8) | 90.6-92.8 | 17(0.7)   | 0.4-1.1   | 16(0.7)  | 0.4-1.1 | 163(6.8)    | 5.9-7.9   | <0.001 |
|                               | rural | 975(66.2)  | 63.7-68.5 | 20(1.4)   | 0.9-2.1   | 16(1.1)  | 0.7-1.8 | 463(31.4)   | 29.1-33.8 |        |
| Gambia<br>2013                | urban | 1353(78.0) | 76.0-79.9 | 12(0.7)   | 0.4-1.2   | 129(7.4) | 6.3-8.8 | 240(13.8)   | 12.3-15.5 | <0.001 |
|                               | rural | 1335(39.2) | 37.6-40.9 | 39(1.2)   | 0.8-1.6   | 185(5.4) | 4.7-6.2 | 1845(54.2)  | 52.5-55.9 |        |
| Ghana<br>2011                 | urban | 661(83.6)  | 80.8-86.0 | 7(0.9)    | 0.4-1.8   | 2(0.3)   | 0.1-1.0 | 121(15.3)   | 13.0-18.0 | <0.001 |
|                               | rural | 922(44.3)  | 42.2-46.4 | 29(1.4)   | 1.0-2.0   | 15(1.4)  | 0.4-1.2 | 1116(53.6)  | 51.5-55.7 |        |
| Guatemala<br>2008             | urban | 1786(75.1) | 73.3-76.8 | 14(0.6)   | 0.3-1.0   | 10(0.4)  | 0.2-0.8 | 568(23.9)   | 22.2-25.6 | <0.001 |
|                               | rural | 1598(38.7) | 37.3-40.2 | 19(0.5)   | 0.3-0.7   | 17(0.4)  | 0.3-0.7 | 2492(60.4)  | 58.9-61.9 |        |
| Guinea<br>2012                | urban | 854(67.8)  | 65.2-70.4 | 184(14.6) | 12.8-16.7 | 5(0.4)   | 0.2-1.0 | 216(17.2)   | 15.2-19.3 | <0.001 |
|                               | rural | 770(25.9)  | 24.3-27.5 | 117(3.9)  | 3.3-4.7   | 62(2.1)  | 1.6-2.7 | 2027(68.1)  | 66.4-69.8 |        |
| Guyana<br>2009                | urban | 241(98.0)  | 95.2-99.2 | 4(1.6)    | 0.6-4.3   | 1(0.4)   | 0.1-2.8 | 0(0.0)      | 0.0-1.5   | <0.001 |
|                               | rural | 879(75.7)  | 73.2-78.1 | 81(7.0)   | 5.6-8.6   | 11(1.0)  | 0.5-1.7 | 190(16.4)   | 14.3-18.6 |        |
| Haiti 2012                    | urban | 881(57.2)  | 54.8-59.7 | 37(2.4)   | 1.7-3.3   | 5(0.3)   | 0.1-0.8 | 616(40.0)   | 37.6-42.5 | <0.001 |
|                               | rural | 701(23.4)  | 21.9-24.9 | 40(1.3)   | 1.0-1.8   | 12(0.4)  | 0.2-0.7 | 2248(74.9)  | 73.3-76.4 |        |
| Honduras<br>2011              | urban | 2158(94.0) | 93.0-94.9 | 15(0.7)   | 0.4-1.1   | 3(0.1)   | 0.0-0.4 | 119(5.2)    | 4.3-6.2   | <0.001 |
|                               | rural | 3216(72.6) | 91.3-93.9 | 13(0.3)   | 0.2-0.5   | 15(0.3)  | 0.2-0.6 | 1185(26.8)  | 25.5-28.1 |        |
| India<br>2005                 | urban | 7928(69.1) | 68.3-70.0 | 728(6.4)  | 5.9-6.8   | 41(0.4)  | 0.3-0.5 | 2773(24.2)  | 23.4-25.0 | <0.001 |
|                               | rural | 6249(33.0) | 32.3-33.7 | 1717(9.1) | 8.7-9.5   | 48(0.3)  | 0.2-0.3 | 10918(57.7) | 57.0-58.4 |        |

|                    |       |            |           |            |           |          |         |            |           |        |
|--------------------|-------|------------|-----------|------------|-----------|----------|---------|------------|-----------|--------|
| Indonesia<br>2012  | urban | 3914(79.0) | 77.9-80.1 | 686(13.9)  | 12.9-14.8 | 13(0.3)  | 0.2-0.5 | 340(6.9)   | 6.2-7.6   | <0.001 |
|                    | rural | 2362(39.6) | 38.4-40.9 | 1832(30.7) | 29.6-31.9 | 5(0.1)   | 0.0-0.2 | 1760(29.5) | 28.4-30.7 |        |
| Iraq<br>2011       | urban | 6097(78.4) | 77.5-79.3 | 1079(13.9) | 13.1-14.7 | 53(0.7)  | 0.5-0.9 | 549(7.1)   | 6.4-7.6   | <0.001 |
|                    | rural | 4164(67.0) | 65.8-68.1 | 859(13.8)  | 13.0-14.7 | 18(0.3)  | 0.2-0.5 | 1175(18.9) | 17.9-19.9 |        |
| Jamaica<br>2011    | urban | 378(99.0)  | 97.2-99.6 | 3(0.8)     | 0.3-2.4   | 1(0.3)   | 0.0-1.8 | 0(0.0)     | 0.0-1.0   | 0.077  |
|                    | rural | 242(97.6)  | 94.7-98.9 | 2(0.8)     | 0.2-3.2   | 0(0.0)   | 0.0-1.5 | 4(1.6)     | 0.6-4.2   |        |
| Jordan<br>2012     | urban | 4136(99.1) | 98.7-99.3 | 27(0.7)    | 0.4-0.9   | 1(0.0)   | 0.0-0.2 | 11(0.3)    | 0.1-0.5   | 0.124  |
|                    | rural | 1934(99.6) | 99.2-99.8 | 4(0.2)     | 0.1-0.5   | 0(0.0)   | 0.0-0.2 | 4(0.2)     | 0.1-0.5   |        |
| Kazakhstan<br>2010 | urban | 1066(99.7) | 99.1-99.9 | 0(0.0)     | 0.0-0.3   | 0(0.0)   | 0.0-0.3 | 3(0.3)     | 0.1-0.9   | 0.028  |
|                    | rural | 954(99.6)  | 98.9-99.8 | 4(0.4)     | 0.2-1.1   | 0(0.0)   | 0.0-0.4 | 0(0.0)     | 0.0-0.4   |        |
| Kenya<br>2008      | urban | 679(74.3)  | 71.4-77.0 | 10(1.1)    | 0.6-2.0   | 5(0.6)   | 0.2-1.3 | 220(24.1)  | 21.4-27.0 | <0.001 |
|                    | rural | 951(33.7)  | 32.0-35.5 | 77(2.7)    | 2.2-3.4   | 1(0.0)   | 0.0-0.3 | 1790(63.5) | 61.7-65.3 |        |
| Kyrgyzstan<br>2012 | urban | 705(99.6)  | 98.7-99.9 | 0(0.0)     | 0,0-0.5   | 0(0.0)   | 0.0-0.5 | 3(0.4)     | 0.1-1.3   | 0.238  |
|                    | rural | 2029(98.8) | 98.3-99.2 | 9(0.4)     | 0.2-0.8   | 2(0.1)   | 0.0-0.4 | 13(0.6)    | 0.4-1.1   |        |
| Lao<br>2011        | urban | 631(70.9)  | 67.8-73.8 | 50(5.6)    | 4.3-7.3   | 1(0.1)   | 0.0-0.8 | 208(23.4)  | 20.7-26.3 | <0.001 |
|                    | rural | 865(24.3)  | 23.0-25.8 | 132(3.7)   | 3.1-4.4   | 23(0.7)  | 0.4-1.0 | 2534(71.3) | 69.8-72.8 |        |
| Lesotho<br>2009    | urban | 356(86.0)  | 82.3-89.0 | 14(3.4)    | 2.0-5.6   | 3(0.7)   | 0.2-2.2 | 41(9.9)    | 7.4-13.2  | <0.001 |
|                    | rural | 1044(49.8) | 47.7-52.0 | 63(3.0)    | 2.4-3.8   | 6(0.3)   | 0.1-0.6 | 983(46.9)  | 44.8-49.0 |        |
| Liberia<br>2013    | urban | 998(68.4)  | 66.0-70.7 | 83(5.7)    | 4.6-7.0   | 20(1.4)  | 0.9-2.1 | 358(24.5)  | 22.4-26.8 | <0.001 |
|                    | rural | 1485(47.4) | 45.5-49.1 | 153(4.9)   | 4.2-5.7   | 70(2.2)  | 1.8-2.8 | 1428(45.5) | 43.8-47.3 |        |
| Macedonia<br>2011  | urban | 259(98.1)  | 95.5-99.2 | 2(0.8)     | 0.2-3.0   | 3(1.1)   | 0.4-3.5 | 0(0.0)     | 0.0-1.4   | 0.067  |
|                    | rural | 233(97.5)  | 94.5-98.9 | 2(0.8)     | 0.2-3.3   | 0(0.0)   | 0.0-1.5 | 4(1.7)     | 0.6-4.4   |        |
| Madagascar<br>2008 | urban | 786(60.5)  | 57.8-63.1 | 260(20.0)  | 17.9-22.3 | 3(0.2)   | 0.1-0.7 | 251(19.3)  | 17.3-21.5 | <0.001 |
|                    | rural | 1853(30.3) | 29.2-31.5 | 419(6.9)   | 6.2-7.5   | 13(0.2)  | 0.1-0.4 | 3830(62.6) | 61.4-63.8 |        |
| Malawi<br>2010     | urban | 993(88.2)  | 86.2-89.9 | 4(0.4)     | 0.1-0.9   | 23(2.0)  | 1.4-3.1 | 106(9.4)   | 7.8-11.3  | <0.001 |
|                    | rural | 7791(70.8) | 69.9-71.6 | 44(0.4)    | 0.3-0.5   | 250(2.3) | 2.0-2.6 | 2925(26.6) | 25.7-27.4 |        |
|                    | urban | 312(97.8)  | 95.5-99.0 | 6(1.9)     | 0.8-4.1   | 0(0.0)   | 0.0-1.2 | 1(0.3)     | 0.0-2.2   | 0.001  |

|                     |       |            |           |           |          |          |         |            |           |        |
|---------------------|-------|------------|-----------|-----------|----------|----------|---------|------------|-----------|--------|
| Maldives<br>2009    | rural | 2013(94.8) | 93.7-95.6 | 17(0.8)   | 0.5-1.3  | 32(1.5)  | 1.1-2.1 | 62(2.9)    | 2.3-3.7   |        |
| Mali<br>2012        | urban | 1412(92.5) | 91.1-93.7 | 19(1.3)   | 0.8-1.9  | 9(0.6)   | 0.3-1.1 | 86(5.6)    | 4.6-6.9   | <0.001 |
|                     | rural | 2059(45.9) | 44.4-47.3 | 222(4.9)  | 4.3-5.6  | 51(1.1)  | 0.9-1.5 | 2158(48.1) | 46.6-49.5 |        |
| Moldova<br>2012     | urban | 403(99.50) | 98.0-99.9 | 0(0.0)    | 0.0-0.9  | 0(0.0)   | 0.0-0.9 | 2(0.5)     | 0.1-2.0   | 0.213  |
|                     | rural | 313(98.4)  | 96.3-99.3 | 2(0.6)    | 0.2-2.5  | 0(0.0)   | 0.0-1.2 | 3(0.9)     | 0.3-2.9   |        |
| Mongolia<br>2010    | urban | 773(99.2)  | 98.3-99.7 | 3(0.4)    | 0.1-1.2  | 0(0.0)   | 0.0-0.5 | 3(0.3)     | 0.1-1.2   | 0.03   |
|                     | rural | 889(97.6)  | 96.4-98.4 | 4(0.4)    | 0.2-1.2  | 3(0.3)   | 0.1-1.0 | 15(1.7)    | 1.0-2.7   |        |
| Montenegro<br>2013  | urban | 315(99.4)  | 97.5-99.8 | 0(0.0)    | 0.0-1.2  | 0(0.0)   | 0.0-1.2 | 2(0.6)     | 0.2-2.5   | 0.928  |
|                     | rural | 176(99.4)  | 96.1-99.9 | 0(0.0)    | 0.0-2.1  | 0(0.0)   | 0.0-2.1 | 1(0.5)     | 0.1-3.9   |        |
| Mozambique<br>2011  | urban | 1867(82.8) | 81.2-84.3 | 14(0.6)   | 0.4-1.0  | 65(2.9)  | 2.3-3.7 | 308(13.7)  | 12.3-15.1 | <0.001 |
|                     | rural | 2334(49.8) | 48.4-51.3 | 82(1.8)   | 1.4-2.2  | 117(2.5) | 2.1-3.0 | 2150(45.9) | 44.5-47.3 |        |
| Namibia<br>2013     | urban | 1325(94.1) | 92.7-95.2 | 10(0.7)   | 0.4-1.3  | 6(0.4)   | 0.2-0.9 | 67(4.8)    | 3.8-6.0   | <0.001 |
|                     | rural | 1380(78.7) | 76.7-80.6 | 38(2.2)   | 1.6-3.0  | 5(0.3)   | 0.1-0.7 | 330(18.8)  | 17.1-20.7 |        |
| Nepal<br>2011       | urban | 460(72.4)  | 68.8-75.8 | 13(2.1)   | 1.2-3.5  | 3(0.5)   | 0.2-1.5 | 159(25.0)  | 21.8-28.6 | <0.001 |
|                     | rural | 790(32.0)  | 30.2-33.9 | 27(1.1)   | 0.8-1.6  | 45(1.8)  | 1.4-2.4 | 1605(65.1) | 63.2-66.9 |        |
| Niger<br>2012       | urban | 1471(86.0) | 84.3-87.6 | 15(0.9)   | 0.5-1.5  | 7(0.4)   | 0.2-0.9 | 217(12.7)  | 11.2-14.4 | <0.001 |
|                     | rural | 1362(23.5) | 22.4-24.6 | 41(0.7)   | 0.5-1.0  | 83(1.4)  | 1.2-1.8 | 4319(74.4) | 73.3-75.5 |        |
| Nigeria<br>2013     | urban | 4006(63.9) | 62.7-65.1 | 369(5.9)  | 5.3-6.5  | 80(1.3)  | 1.0-1.6 | 1813(28.9) | 27.8-30.1 | <0.001 |
|                     | rural | 2807(22.3) | 21.6-23.0 | 329(2.6)  | 2.3-2.9  | 286(2.3) | 2.0-2.5 | 9179(72.8) | 72.1-73.1 |        |
| Pakistan<br>2012    | urban | 1917(66.8) | 65.0-68.5 | 98(3.4)   | 2.8-4.1  | 15(0.5)  | 0.3-0.9 | 841(29.3)  | 27.7-31.0 | <0.001 |
|                     | rural | 1720(43.2) | 41.7-44.8 | 183(4.6)  | 4.0-5.3  | 21(0.5)  | 0.3-0.8 | 2054(51.6) | 50.1-53.2 |        |
| Peru<br>2012        | urban | 3184(94.8) | 94.0-95.5 | 30(0.9)   | 0.6-1.3  | 9(0.3)   | 0.1-0.5 | 136(4.1)   | 3.4-4.8   | <0.001 |
|                     | rural | 1573(67.0) | 65.0-68.8 | 112(4.8)  | 4.0-5.7  | 28(1.2)  | 0.8-1.7 | 636(27.1)  | 25.3-28.9 |        |
| Philippines<br>2013 | urban | 1296(74.4) | 72.3-76.4 | 146(8.4)  | 7.2-9.8  | 1(0.1)   | 0.0-0.4 | 298(17.1)  | 15.4-19.0 | <0.001 |
|                     | rural | 1373(54.0) | 53.6-56.5 | 238(10.0) | 4.4-10.7 | 6(0.2)   | 0.1-0.5 | 899(35.7)  | 33.9-37.6 |        |
|                     | urban | 595(85.7)  | 82.9-88.1 | 5(0.7)    | 0.3-1.7  | 3(0.4)   | 0.1-1.3 | 91(13.1)   | 10.8-15.8 | <0.001 |

|                          |       |            |            |           |           |           |           |            |           |        |
|--------------------------|-------|------------|------------|-----------|-----------|-----------|-----------|------------|-----------|--------|
| Rwanda 2010              | rural | 3391(75.3) | 74.0-76.5  | 14(0.3)   | 0.2-0.5   | 14(0.3)   | 0.2-0.5   | 1086(24.1) | 22.9-25.4 |        |
| São Tome & Príncipe 2008 | urban | 397(84.8)  | 81.3-87.8  | 17(3.6)   | 2.3-5.8   | 0(0.0)    | 0.0-0.8   | 54(11.5)   | 8.9-14.8  | <0.001 |
|                          | rural | 542(73.9)  | 70.6-77.0  | 27(3.7)   | 2.5-5.3   | 4(0.6)    | 0.2-1.4   | 160(21.8)  | 19.0-25.0 |        |
| Senegal 2014             | urban | 932(73.9)  | 71.4-76.2  | 22(1.7)   | 1.2-2.6   | 201(15.9) | 14.0-18.1 | 107(8.5)   | 7.1-10.1  | <0.001 |
|                          | rural | 1159(40.3) | 38.6-42.1  | 16(0.6)   | 0.3-0.9   | 611(21.3) | 19.8-22.8 | 1087(37.8) | 36.1-39.6 |        |
| Serbia 2014              | urban | 595(99.2)  | 98.0-99.7  | 1(0.2)    | 0.0-1.2   | 0(0.0)    | 0.0-0.6   | 4(0.7)     | 0.2-1.8   | 0.711  |
|                          | rural | 354(98.6)  | 96.7-99.4  | 1(0.3)    | 0.0-2.0   | 0(0.0)    | 0.0-1.0   | 4(1.11)    | 0.4-2.9   |        |
| Sierra Leone 2013        | urban | 1558(72.9) | 71.0-74.8  | 198(9.3)  | 8.1-10.6  | 20(0.9)   | 0.6-1.4   | 360(16.9)  | 15.3-18.5 | <0.001 |
|                          | rural | 2572(51.9) | 50.5-53.3  | 222(4.5)  | 3.9-5.1   | 38(0.8)   | 0.6-1.1   | 2127(42.9) | 41.5-44.3 |        |
| St Lucia 2012            | urban | 33(100.0)  | 89.4-100.0 | 0(0.0)    | 0.0-10.6  | 0(0.0)    | 0.0-10.6  | 0(0.0)     | 0.0-10.6  | 0.474  |
|                          | rural | 64(98.5)   | 89.5-99.8  | 0(0.0)    | 0.0-5.5   | 1(1.5)    | 0.2-10.5  | 0(0.0)     | 0.0-5.5   |        |
| State of Palestine 2010  | urban | 3498(98.4) | 97.9-98.8  | 40(1.1)   | 0.8-1.5   | 16(0.5)   | 0.0-0.3   | 25(0.7)    | 0.2-0.6   | 0.072  |
|                          | rural | 755(97.4)  | 96.0-98.3  | 12(1.6)   | 0.9-2.7   | 10(1.3)   | 0.2-1.4   | 10(1.3)    | 0.2-1.4   |        |
| Suriname 2010            | urban | 375(93.1)  | 90.1-95.2  | 14(3.5)   | 2.1-5.8   | 6(1.5)    | 0.7-3.3   | 8(2.0)     | 1.0-3.9   | <0.001 |
|                          | rural | 678(78.7)  | 75.8-81.3  | 54(6.3)   | 4.8-8.1   | 81(9.4)   | 7.6-11.5  | 49(5.7)    | 4.3-7.4   |        |
| Swaziland 2010           | urban | 277(85.5)  | 81.2-88.9  | 10(3.1)   | 1.7-5.6   | 3(1.0)    | 0.3-2.8   | 34(10.5)   | 7.6-14.3  | 0.001  |
|                          | rural | 535(77.1)  | 73.8-80.1  | 11(1.6)   | 0.9-2.8   | 9(1.3)    | 0.7-2.5   | 139(20.0)  | 17.2-23.2 |        |
| Tajikistan 2012          | urban | 857(88.7)  | 86.6-90.6  | 58(6.0)   | 4.7-7.7   | 3(0.3)    | 0.1-1.0   | 48(5.0)    | 3.8-6.5   | <0.001 |
|                          | rural | 1649(74.0) | 72.1-75.8  | 294(13.2) | 11.8-14.7 | 10(0.5)   | 0.2-0.8   | 276(12.4)  | 11.1-13.8 |        |
| Tanzania 2010            | urban | 722(79.1)  | 76.3-81.6  | 22(2.4)   | 1.6-3.6   | 6(0.7)    | 0.3-1.5   | 163(17.9)  | 15.5-20.5 | <0.001 |
|                          | rural | 1604(40.9) | 39.4-42.5  | 59(1.5)   | 1.2-1.9   | 28(0.7)   | 0.5-1.0   | 2229(56.9) | 55.3-58.4 |        |
|                          | urban | 580(44.4)  | 41.8-47.2  | 89(6.8)   | 5.6-8.3   | 4(0.3)    | 0.1-0.8   | 632(48.4)  | 45.7-51.1 | <0.001 |

|                     |       |            |           |          |         |           |           |            |           |        |
|---------------------|-------|------------|-----------|----------|---------|-----------|-----------|------------|-----------|--------|
| Timor Leste<br>2009 | rural | 665(14.5)  | 13.5-15.5 | 410(8.9) | 8.1-9.8 | 5(0.1)    | 0.0-0.3   | 3521(76.5) | 75.3-77.7 |        |
| Togo<br>2013        | urban | 1130(91.9) | 90.3-93.3 | 9(0.7)   | 0.4-1.4 | 35(2.9)   | 2.1-3.9   | 55(4.5)    | 3.5-5.8   | <0.001 |
|                     | rural | 1199(39.8) | 38.0-41.5 | 3(0.1)   | 0.0-0.3 | 639(21.2) | 19.8-22.7 | 1174(38.9) | 37.2-40.7 |        |
| Tunisia<br>2011     | urban | 642(99.4)  | 98.4-99.8 | 0(0.0)   |         | 0(0.0)    | 0.0-0.6   | 4(0.6)     | 0.2-1.6   | <0.001 |
|                     | rural | 462(94.5)  | 92.1-96.2 | 2(0.4)   | 0.1-1.6 | 0(0.0)    | 0.0-0.8   | 25(5.1)    | 3.5-7.5   |        |
| Uganda<br>2011      | urban | 909(88.8)  | 86.7-90.6 | 15(1.5)  | 0.9-2.4 | 9(0.9)    | 0.5-1.7   | 91(8.9)    | 7.3-10.8  | <0.001 |
|                     | rural | 1912(51.2) | 49.6-52.8 | 69(1.9)  | 1.5-2.3 | 54(1.5)   | 1.1-1.9   | 1702(45.5) | 44.0-47.1 |        |
| Ukraine<br>2012     | urban | 981(99.1)  | 98.3-99.5 | 2(0.2)   | 0.1-0.8 | 0(0.0)    | 0.0-0.4   | 7(0.7)     | 0.3-1.5   | 0.50   |
|                     | rural | 565(98.4)  | 97.0-99.2 | 2(0.4)   | 0.1-1.4 | 0(0.0)    | 0.0-0.6   | 7(1.2)     | 0.6-2.5   |        |
| Vietnam<br>2010     | urban | 530(97.8)  | 96.1-98.7 | 3(0.6)   | 0.2-1.7 | 0(0.0)    | 0.0-0.7   | 9(1.7)     | 0.9-3.2   | <0.001 |
|                     | rural | 684(83.3)  | 80.6-85.7 | 11(1.3)  | 0.7-2.4 | 5(0.6)    | 0.3-1.5   | 121(14.7)  | 12.5-17.3 |        |
| Zambia<br>2007      | urban | 1039(79.9) | 77.6-82.0 | 5(0.4)   | 0.2-0.9 | 15(1.2)   | 0.7-1.9   | 242(18.6)  | 16.6-20.8 | <0.001 |
|                     | rural | 851(31.7)  | 30.0-33.5 | 10(0.4)  | 0.2-0.7 | 56(2.1)   | 1.6-2.7   | 1766(65.8) | 64.0-67.6 |        |
| Zimbabwe<br>2010    | urban | 902(85.8)  | 83.6-87.8 | 12(1.1)  | 0.6-2.0 | 2(0.2)    | 0.0-0.8   | 135(12.8)  | 11.0-15.0 | <0.001 |
|                     | rural | 1407(55.5) | 53.2-57.1 | 54(2.1)  | 1.6-2.8 | 21(0.8)   | 0.5-1.3   | 1068(41.9) | 40.0-43.8 |        |

p: Chi-square test of heterogeneity; SBA: skilled birth attendant. CAR: Central African Republic

**Web Table A2: Distribution of delivery assistance according to economic status in LMICs (n=80 countries)**

| Country          | Wealth quintile | SBA, institutional |            | Home, SBA |          | Institutional, non-SBA |         | Home, non-SBA |           | p value |
|------------------|-----------------|--------------------|------------|-----------|----------|------------------------|---------|---------------|-----------|---------|
|                  |                 | N (%)              | 95% CI     | N (%)     | 95% CI   | N (%)                  | 95% CI  | N (%)         | 95% CI    |         |
| Afghanistan 2010 | Q1              | 103(12.6)          | 10.3-14.9  | 35(4.3)   | 3.0-5.7  | 6(0.7)                 | 0.1-1.3 | 673(82.4)     | 79.8-85.0 | <0.001  |
|                  | Q2              | 173(18.5)          | 16.0-21.0  | 58(6.2)   | 4.7-7.8  | 13(1.4)                | 0.6-2.1 | 690(93.9)     | 71.1-76.7 |         |
|                  | Q3              | 261(28.9)          | 25.9-31.8  | 50(5.5)   | 4.4-7.0  | 14(1.6)                | 0.7-2.4 | 579(64.1)     | 61.0-67.2 |         |
|                  | Q4              | 366(39.6)          | 36.5-42.8  | 97(10.5)  | 8.5-12.5 | 9(0.9)                 | 0.3-1.6 | 452(48.9)     | 45.7-52.1 |         |
|                  | Q5              | 749(67.7)          | 65.0-70.5  | 114(10.3) | 8.5-12.1 | 14(1.3)                | 0.6-1.9 | 229(20.7)     | 18.3-23.1 |         |
| Albania 2008     | Q1              | 196(91.6)          | 87.9-95.3  | 16(7.5)   | 3.9-11.0 | 0(0.0)                 | 0.0-1.7 | 2(0.9)        | 0.4-2.2   | <0.001  |
|                  | Q2              | 158(98.1)          | 96.0-100.0 | 2(1.2)    | 0.5-3.0  | 0(0.0)                 | 0.0-2.3 | 1(0.6)        | 0.6-1.8   |         |
|                  | Q3              | 178(99.0)          | 97.4-100.0 | 0(0.0)    | 0.0-2.0  | 0(0.0)                 | 0.0-2.0 | 2(1.1)        | 0.4-2.6   |         |
|                  | Q4              | 176(99.0)          | 97.3-100.0 | 2(1.1)    | 0.4-3.0  | 0(0.0)                 | 0.0-2.0 | 0(0.0)        | 0.0-2.0   |         |
|                  | Q5              | 145(99.3)          | 98.0-100.0 | 1(0.7)    | 0.7-2.0  | 0(0.0)                 | 0.0-2.5 | 0(0.0)        | 0.0-2.5   |         |
| Armenia 2010     | Q1              | 165(100.0)         | 97.8-100.0 | 0(0.0)    | 0.0-2.2  | 0(0.0)                 | 0.0-2.2 | 0(0.0)        | 0.0-2.2   | 0.667   |
|                  | Q2              | 205(99.5)          | 98.6-100.0 | 0(0.0)    | 0.0-2.8  | 0(0.0)                 | 0.0-2.8 | 1(0.5)        | 0.5-1.4   |         |
|                  | Q3              | 203(100.0)         | 98.2-100.0 | 0(0.0)    | 0.0-1.8  | 0(0.0)                 | 0.0-1.8 | 0(0.0)        | 0.0-1.8   |         |
|                  | Q4              | 221(99.10)         | 97.7-100.0 | 1(0.5)    | 0.4-1.3  | 0(0.0)                 | 0.0-1.6 | 1(0.5)        | 0.4-1.3   |         |
|                  | Q5              | 140(99.3)          | 98.0-100.0 | 1(0.7)    | 0.7-2.1  | 0(0.0)                 | 0.0-2.6 | 0(0.0)        | 0.0-2.6   |         |



|                    |    |            |            |           |           |          |         |           |           |        |
|--------------------|----|------------|------------|-----------|-----------|----------|---------|-----------|-----------|--------|
| Azerbaijan<br>2006 | Q1 | 221(66.6)  | 61.5-71.7  | 46(13.86) | 10.1-17.6 | 3(0.9)   | 0.1-1.9 | 62(18.7)  | 14.5-22.9 | <0.001 |
|                    | Q2 | 260(74.90) | 70.4-79.5  | 51(14.7)  | 11.0-18.4 | 1(0.3)   | 0.3-0.9 | 35(10.1)  | 6.9-13.3  |        |
|                    | Q3 | 275(84.6)  | 80.7-88.5  | 27(8.3)   | 5.3-11.3  | 0(0.0)   | 0.0-1.1 | 23(7.1)   | 4.3-9.9   |        |
|                    | Q4 | 220(94.0)  | 91.0-97.1  | 8(3.4)    | 1.1-5.8   | 0(0.0)   | 0.0-1.6 | 6(2.6)    | 0.5-4.6   |        |
|                    | Q5 | 163(99.4)  | 98.2-100.0 | 1(0.6)    | 0.6-1.8   | 0(0.0)   | 0.0-2.2 | 0(0.0)    | 0.0-2.2   |        |
| Bangladesh<br>2011 | Q1 | 124(11.6)  | 9.7-13.5   | 22(2.1)   | 1.2-2.9   | 1(0.1)   | 0.1-0.3 | 923(86.3) | 84.2-88.3 | <0.001 |
|                    | Q2 | 164(17.2)  | 14.8-19.6  | 18(1.9)   | 1.0-2.7   | 4(0.4)   | 0.0-0.8 | 769(80.5) | 78.0-83.0 |        |
|                    | Q3 | 243(25.7)  | 22.9-28.5  | 46(4.9)   | 3.5-6.2   | 1(0.1)   | 0.1-0.3 | 655(69.3) | 66.4-72.3 |        |
|                    | Q4 | 391(39.0)  | 36.0-42.0  | 51(5.1)   | 3.7-6.5   | 5(0.5)   | 0.1-0.9 | 555(53.4) | 52.3-58.5 |        |
|                    | Q5 | 619(61.7)  | 58.7-64.7  | 53(5.3)   | 3.9-6.7   | 5(0.5)   | 0.1-0.9 | 326(32.5) | 29.6-35.4 |        |
| Belarus<br>2012    | Q1 | 177(100.0) | 97.9-100.0 | 0(0.0)    | 0.0-2.1   | 0(0.0)   | 0.0-2.1 | 0(0.0)    | 0.0-2.1   | 0.412  |
|                    | Q2 | 245(100.0) | 98.5-100.0 | 0(0.0)    | 0.0-1.5   | 0(0.0)   | 0.0-1.5 | 0(0.0)    | 0.0-1.5   |        |
|                    | Q3 | 235(99.6)  | 98.7-100.0 | 0(0.0)    | 0.0-1.6   | 0(0.0)   | 0.0-1.6 | 1(0.4)    | 0.4-1.3   |        |
|                    | Q4 | 286(99.6)  | 98.9-100.0 | 1(0.4)    | 0.3-1.0   | 0(0.0)   | 0.0-1.3 | 0(0.0)    | 0.0-1.3   |        |
|                    | Q5 | 379(100.0) | 99.0-100.0 | 0(0.0)    | 0.0-1.0   | 0(0.0)   | 0.0-1.0 | 0(0.0)    | 0.0-1.0   |        |
| Belize<br>2011     | Q1 | 171(80.7)  | 75.3-86.0  | 17(8.0)   | 4.3-11.7  | 4(1.9)   | 0.0-3.7 | 20(9.4)   | 5.5-13.4  | <0.001 |
|                    | Q2 | 148(98.0)  | 95.8-100.0 | 0(0.0)    | 0.0-2.4   | 1(0.7)   | 0.6-2.0 | 2(1.3)    | 0.5-3.2   |        |
|                    | Q3 | 127(95.5)  | 91.9-99.0  | 4(3.0)    | 0.1-5.9   | 0(0.0)   | 0.0-2.7 | 2(1.5)    | 0.6-3.6   |        |
|                    | Q4 | 123(97.6)  | 94.9-100.0 | 2(1.59)   | 0.6-3.8   | 0(0.0)   | 0.0-2.9 | 1(0.8)    | 0.7-2.4   |        |
|                    | Q5 | 77(96.3)   | 92.1-100.0 | 1(1.3)    | 1.2-3.7   | 0(0.0)   | 0.0-4.5 | 2(2.5)    | 0.9-5.9   |        |
| Benin<br>2011      | Q1 | 1137(63.7) | 61.5-65.9  | 27(1.5)   | 0.9-2.1   | 138(7.7) | 6.5-9.0 | 483(27.1) | 25.0-29.1 | <0.001 |
|                    | Q2 | 1325(78.6) | 76.6-80.5  | 31(1.8)   | 1.2-2.5   | 87(5.2)  | 4.1-6.2 | 243(14.4) | 12.7-16.1 |        |
|                    | Q3 | 1396(84.7) | 83.0-86.4  | 14(0.9)   | 0.4-1.3   | 67(4.1)  | 3.1-5.0 | 171(10.4) | 8.9-11.8  |        |
|                    | Q4 | 1458(96.1) | 95.1-97.0  | 4(0.3)    | 0.0-0.5   | 21(1.4)  | 0.8-2.0 | 35(2.3)   | 1.6-3.1   |        |
|                    | Q5 | 1214(98.3) | 97.5-99.0  | 4(0.3)    | 0.0-0.6   | 6(0.5)   | 0.0-0.9 | 11(0.9)   | 0.4-1.4   |        |
| Bhutan<br>2010     | Q1 | 160(31.3)  | 27.3-35.3  | 14(2.7)   | 1.3-4.2   | 5(1.0)   | 0.1-1.8 | 332(65.0) | 60.8-69.1 | <0.001 |
|                    | Q2 | 223(41.8)  | 37.6-46.0  | 17(3.2)   | 1.7-4.7   | 3(0.6)   | 0.0-1.2 | 290(54.4) | 50.2-58.6 |        |

|                        |    |             |            |          |         |         |         |           |           |        |
|------------------------|----|-------------|------------|----------|---------|---------|---------|-----------|-----------|--------|
|                        | Q3 | 326(61.8)   | 57.7-66.0  | 19(3.6)  | 2.0-5.2 | 2(0.4)  | 0.1-0.9 | 180(34.2) | 30.1-38.2 |        |
|                        | Q4 | 384(77.6)   | 73.9-81.3  | 13(2.6)  | 1.2-4.0 | 6(1.2)  | 0.2-2.2 | 92(18.6)  | 15.2-22.0 |        |
|                        | Q5 | 376(94.2)   | 91.9-96.5  | 1(0.3)   | 0.2-0.7 | 3(0.8)  | 0.1-1.6 | 19(4.8)   | 2.7-6.9   |        |
| Bolivia<br>2008        | Q1 | 558(37.7)   | 35.2-40.1  | 106(7.2) | 5.8-8.5 | 3(0.2)  | 0.0-0.4 | 814(55.0) | 52.4-57.5 | <0.001 |
|                        | Q2 | 766(67.4)   | 64.6-70.1  | 64(5.6)  | 4.3-7.0 | 1(0.1)  | 0.1-0.3 | 306(26.9) | 24.3-29.5 |        |
|                        | Q3 | 886(83.6)   | 81.4-85.8  | 16(1.5)  | 0.8-2.2 | 6(0.6)  | 0.1-1.0 | 152(14.3) | 12.2-16.5 |        |
|                        | Q4 | 832(93.1)   | 91.4-94.7  | 3(0.3)   | 0.0-0.7 | 7(0.8)  | 0.2-1.4 | 52(5.8)   | 4.3-7.4   |        |
|                        | Q5 | 644(98.6)   | 97.7-99.5  | 1(0.2)   | 0.1-0.5 | 2(0.3)  | 0.1-0.7 | 6(0.9)    | 0.2-1.7   |        |
| Bosnia & Herz.<br>2011 | Q1 | 112(100.0)  | 96.8-100.0 | 0(0.0)   | 0.0-3.2 | 0(0.0)  | 0.0-3.2 | 0(0.0)    | 0.0-3.2   | 0.584  |
|                        | Q2 | 148(98.7)   | 96.8-100.0 | 1(0.7)   | 0.6-2.0 | 1(0.7)  | 0.0-2.4 | 1(0.7)    | 0.6-2.0   |        |
|                        | Q3 | 151(99.3)   | 98.1-100.0 | 1(0.7)   | 0.6-1.9 | 0(0.0)  | 0.0-2.4 | 0(0.0)    | 0.0-2.4   |        |
|                        | Q4 | 139(100.0)  | 97.4-100.0 | 0(0.0)   | 0.0-2.6 | 0(0.0)  | 0.0-2.6 | 0(0.0)    | 0.0-2.6   |        |
|                        | Q5 | 165(100.0)  | 97.8-100.0 | 0(0.0)   | 0.0-2.2 | 0(0.0)  | 0.0-2.8 | 0(0.0)    | 0.0-2.8   |        |
| Brazil<br>2006         | Q1 | 1046(91.27) | 89.6-92.9  | 3(0.3)   | 0.0-0.6 | 20(1.8) | 1.0-2.5 | 77(6.8)   | 5.3-8.2   | <0.001 |
|                        | Q2 | 731(96.6)   | 95.3-97.9  | 1(0.1)   | 0.1-0.4 | 12(1.6) | 0.7-2.5 | 13(1.7)   | 0.8-2.6   |        |
|                        | Q3 | 468(97.5)   | 96.1-98.9  | 2(0.4)   | 0.2-1.0 | 6(1.3)  | 0.3-2.2 | 4(0.8)    | 0.0-1.6   |        |
|                        | Q4 | 332(98.2)   | 96.8-99.6  | 1(0.3)   | 0.3-0.8 | 4(1.2)  | 0.0-2.3 | 1(0.3)    | 0.3-0.9   |        |
|                        | Q5 | 224(99.1)   | 97.9-100.0 | 2(0.9)   | 0.3-2.1 | 0(0.0)  | 0.0-1.6 | 0(0.0)    | 0.0-1.6   |        |
| Burkina Faso<br>2010   | Q1 | 886(52.2)   | 49.8-54.6  | 10(0.6)  | 0.2-1.0 | 4(0.2)  | 0.0-0.5 | 797(47.0) | 44.6-49.3 | <0.001 |
|                        | Q2 | 1200(63.9)  | 61.7-66.1  | 28(1.5)  | 1.0-2.0 | 5(0.3)  | 0.0-0.5 | 645(34.4) | 32.2-36.5 |        |
|                        | Q3 | 1484(74.0)  | 72.1-75.9  | 21(1.1)  | 0.6-1.5 | 2(0.1)  | 0.0-0.2 | 498(24.8) | 22.9-26.7 |        |
|                        | Q4 | 1634(92.2)  | 81.5-84.8  | 15(0.8)  | 0.4-1.1 | 2(0.1)  | 0.0-0.2 | 314(16.0) | 14.4-17.6 |        |
|                        | Q5 | 1387(95.2)  | 94.1-96.3  | 3(0.2)   | 0.0-0.4 | 4(0.3)  | 0.0-0.5 | 63(4.3)   | 3.3-5.4   |        |
| Burundi<br>2010        | Q1 | 506(54.7)   | 51.5-57.9  | 8(0.9)   | 0.4-1.7 | 3(0.3)  | 0.1-1.0 | 408(44.1) | 40.9-47.3 | <0.001 |
|                        | Q2 | 566(60.5)   | 57.3-63.6  | 5(0.5)   | 0.2-1.3 | 1(1.1)  | 0.0-0.8 | 364(38.9) | 35.8-42.1 |        |
|                        | Q3 | 549(63.1)   | 59.8-66.3  | 9(1.0)   | 0.5-2.0 | 7(0.8)  | 0.4-1.7 | 305(35.1) | 32.0-38.3 |        |
|                        | Q4 | 571(65.3)   | 62.4-68.7  | 9(1.0)   | 0.5-2.0 | 3(0.3)  | 0.1-1.1 | 287(33.0) | 29.9-36.2 |        |

|                  |    |            |           |            |           |          |          |            |           |        |
|------------------|----|------------|-----------|------------|-----------|----------|----------|------------|-----------|--------|
|                  | Q5 | 984(85.6)  | 83.5-87.6 | 15(1.3)    | 0.8-2.2   | 1(0.1)   | 0.0-0.6  | 149(13.0)  | 11.1-15.0 |        |
| Cambodia<br>2010 | Q1 | 495(37.8)  | 35.2-40.5 | 145(11.1)  | 9.5-12.9  | 4(0.3)   | 0.1-0.8  | 665(50.8)  | 48.1-53.5 | <0.001 |
|                  | Q2 | 451(46.6)  | 43.6-49.9 | 145(11.0)  | 12.9-17.4 | 0(0.0)   | NO       | 369(38.2)  | 35.2-41.4 |        |
|                  | Q3 | 490(59.2)  | 55.8-62.5 | 141(17.0)  | 14.6-19.7 | 3(0.4)   | 0.1-1.1  | 194(23.4)  | 20.7-26.4 |        |
|                  | Q4 | 629(73.3)  | 70.2-76.2 | 137(16.0)  | 13.7-18.6 | 4(0.5)   | 0.2-1.2  | 88(10.3)   | 8.4-12.5  |        |
|                  | Q5 | 889(88.1)  | 86.0-90.0 | 98(9.6)    | 7.9-11.6  | 4(0.4)   | 0.1-1.0  | 19(1.9)    | 1.2-2.9   |        |
| Cameroon<br>2011 | Q1 | 268(18.1)  | 16.2-20.1 | 29(2.0)    | 1.4-2.8   | 3(0.2)   | 0.1-0.6  | 1183(79.8) | 77.6-81.7 | <0.001 |
|                  | Q2 | 935(54.9)  | 52.6-57.3 | 49(2.9)    | 2.2-3.8   | 7(0.4)   | 0.2-0.9  | 711(41.8)  | 39.5-44.1 |        |
|                  | Q3 | 1164(72.4) | 70.2-74.6 | 60(3.7)    | 2.9-4.8   | 3(0.2)   | 0.1-0.6  | 380(23.7)  | 21.6-25.8 |        |
|                  | Q4 | 1172(86.9) | 85.0-88.6 | 51(3.8)    | 2.9-4.9   | 6(0.4)   | 0.2-1.0  | 120(8.9)   | 7.5-10.5  |        |
|                  | Q5 | 1040(95.3) | 93.9-96.4 | 23(2.1)    | 1.4-3.2   | 4(0.4)   | 0.1-1.0  | 24(2.2)    | 1.5-3.2   |        |
| CAR<br>2010      | Q1 | 318(30.7)  | 28.0-33.6 | 58(5.6)    | 4.4-7.2   | 52(5.0)  | 3.8-6.5  | 607(58.7)  | 55.6-61.6 | <0.001 |
|                  | Q2 | 416(36.9)  | 34.1-39.7 | 77(6.8)    | 5.5-8.5   | 80(7.1)  | 5.7-8.7  | 555(49.2)  | 46.3-52.1 |        |
|                  | Q3 | 520(47.9)  | 45.0-50.9 | 64(5.9)    | 4.6-7.5   | 103(9.5) | 7.9-11.4 | 398(36.7)  | 33.9-39.6 |        |
|                  | Q4 | 506(61.90) | 58.5-65.1 | 58(7.1)    | 5.5-9.1   | 47(5.80) | 4.3-7.6  | 207(25.3)  | 22.4-28.4 |        |
|                  | Q5 | 373(77.9)  | 73.9-81.4 | 32(6.7)    | 4.8-9.3   | 22(4.6)  | 3.0-6.9  | 52(10.9)   | 8.4-14.0  |        |
| Chad<br>2010     | Q1 | 44(4.8)    | 3.6-6.4   | 35(3.8)    | 2.7-5.3   | 2(0.2)   | 0.1-0.8  | 839(91.2)  | 89.2-92.9 | <0.001 |
|                  | Q2 | 58(5.6)    | 4.4-7.2   | 44(4.3)    | 3.2-5.7   | 4(0.4)   | 0.1-1.0  | 923(89.7)  | 87.7-91.4 |        |
|                  | Q3 | 128(10.2)  | 8.6-12.0  | 60(4.8)    | 3.7-6.1   | 6(0.5)   | 0.2-1.1  | 1062(84.6) | 82.4-86.4 |        |
|                  | Q4 | 282(18.2)  | 16.3-20.2 | 145(9.4)   | 8.0-10.9  | 13(0.8)  | 0.5-1.4  | 1111(71.6) | 69.3-73.8 |        |
|                  | Q5 | 567(40.6)  | 30.0-43.2 | 214(15.32) | 13.5-17.3 | 6(0.4)   | 0.2-1.0  | 610(43.7)  | 41.146.3  |        |
| Comoros<br>2012  | Q1 | 304(58.5)  | 54.2-62.3 | 39(7.5)    | 5.5-10.1  | 0(0.0)   | 0.0-0.7  | 177(34.0)  | 30.1-38.2 | <0.001 |
|                  | Q2 | 305(74.2)  | 69.8-78.2 | 26(6.3)    | 4.3-9.1   | 0(0.0)   | 0.0-0.9  | 80(19.5)   | 15.923.6  |        |
|                  | Q3 | 320(83.8)  | 79.7-87.1 | 24(6.3)    | 4.2-9.2   | 3(0.8)   | 0.3-2.4  | 35(9.2)    | 6.4-12.5  |        |
|                  | Q4 | 286(88.3)  | 84.3-91.4 | 22(6.8)    | 4.5-10.1  | 1(0.3)   | 0.0-2.2  | 15(4.6)    | 2.8-7.5   |        |
|                  | Q5 | 285(91.1)  | 87.3-93.8 | 12(3.8)    | 2.2-6.3   | 1(0.3)   | 0.0-2.2  | 15(4.8)    | 2.9-7.8   |        |
|                  | Q1 | 1914(75.0) | 73.3-76.6 | 140(5.5)   | 4.7-6.4   | 7(0.3)   | 0.1-0.6  | 492(19.3)  | 17.8-20.8 | <0.001 |

|                               |    |            |           |          |          |         |         |            |           |        |
|-------------------------------|----|------------|-----------|----------|----------|---------|---------|------------|-----------|--------|
| Congo<br>Brazzaville<br>2011  | Q2 | 1409(89.5) | 87.9-90.9 | 57(3.6)  | 2.8-4.7  | 7(0.4)  | 0.2-0.9 | 101(6.4)   | 5.3-7.7   |        |
|                               | Q3 | 648(96.1)  | 94.4-97.4 | 8(1.2)   | 0.6-2.4  | 2(0.3)  | 0.1-1.2 | 16(2.4)    | 1.5-3.8   |        |
|                               | Q4 | 549(97.0)  | 95.2-98.1 | 7(1.2)   | 0.6-2.6  | 1(0.2)  | 0.0-1.2 | 9(1.6)     | 0.1-3.0   |        |
|                               | Q5 | 412(98.6)  | 96.8-99.4 | 3(0.7)   | 0.2-2.2  | 1(0.2)  | 0.0-1.7 | 29(0.5)    | 0.1-2.0   |        |
| Congo D.R.<br>2013            | Q1 | 1719(56.3) | 54.5-58.1 | 114(3.7) | 3.1-4.5  | 83(2.7) | 2.2-3.4 | 1137(37.2) | 35.5-39.0 | <0.001 |
|                               | Q2 | 1623(64.4) | 62.5-66.3 | 90(3.6)  | 2.9-4.4  | 86(3.4) | 2.8-4.2 | 721(28.6)  | 26.9-30.4 |        |
|                               | Q3 | 1731(73.6) | 71.7-75.3 | 41(1.7)  | 1.3-2.4  | 52(2.2) | 1.7-2.9 | 529(22.5)  | 20.8-24.2 |        |
|                               | Q4 | 1709(87.5) | 85.9-88.9 | 34(1.7)  | 1.2-2.4  | 22(1.1) | 0.1-1.7 | 189(9.7)   | 8.4-11.1  |        |
|                               | Q5 | 1477(97.0) | 96.1-97.8 | 10(0.7)  | 0.4-1.2  | 13(0.9) | 0.5-1.5 | 22(1.5)    | 0.5-2.2   |        |
| Costa Rica<br>2011            | Q1 | 287(95.4)  | 92.3-97.2 | 6(2.0)   | 1.0-4.4  | 0(0.0)  | 0.0-1.2 | 8(2.7)     | 1.3-5.2   | 0.009  |
|                               | Q2 | 207(99.0)  | 96.2-99.8 | 0(0.0)   | 0.0-1.8  | 2(1.0)  | 0.2-3.8 | 0(0.0)     | 0.0-1.8   |        |
|                               | Q3 | 146(99.3)  | 95.3-99.0 | 0(0.0)   | 0.0-2.5  | 1(0.7)  | 0.0-4.7 | 0(0.0)     | 0.0-2.5   |        |
|                               | Q4 | 114(99.1)  | 94.0-99.9 | 0(0.0)   | 0.0-3.2  | 1(0.9)  | 0.1-6.0 | 0(0.0)     | 0.0-3.2   |        |
|                               | Q5 | 80(97.6)   | 90.7-99.4 | 0(0.0)   | 0.0-4.4  | 1(1.2)  | 0.2-8.3 | 1(1.2)     | 0.2-8.3   |        |
| Cote d'Ivoire<br>2011         | Q1 | 351(31.9)  | 29.2-34.8 | 28(2.6)  | 1.8-3.7  | 13(1.2) | 0.7-2.0 | 707(64.3)  | 61.4-67.1 | <0.001 |
|                               | Q2 | 533(50.0)  | 45.0-53.0 | 19(1.8)  | 1.1-2.8  | 12(1.1) | 0.6-2.0 | 502(47.1)  | 44.1-50.1 |        |
|                               | Q3 | 570(50.4)  | 47.5-53.3 | 18(1.6)  | 1.0-2.5  | 6(0.5)  | 0.2-1.2 | 537(47.5)  | 44.6-50.4 |        |
|                               | Q4 | 617(73.0)  | 69.9-75.9 | 33(3.9)  | 2.8-5.4  | 5(0.6)  | 0.2-1.4 | 190(22.5)  | 19.8-25.4 |        |
|                               | Q5 | 587(88.3)  | 85.5-90.5 | 12(1.8)  | 1.0-3.2  | 2(0.3)  | 0.1-1.2 | 64(9.6)    | 7.6-12.1  |        |
| Dominican<br>Republic<br>2013 | Q1 | 662(93.5)  | 91.4-95.1 | 8(1.1)   | 0.6-2.2  | 3(0.4)  | 0.1-1.3 | 35(4.9)    | 3.6-6.8   | <0.001 |
|                               | Q2 | 513(99.2)  | 97.9-99.7 | 1(0.2)   | 0.0-1.4  | 3(0.6)  | 0.1-1.5 | 2(0.4)     | 0.0-1.4   |        |
|                               | Q3 | 403(99.0)  | 97.4-99.6 | 0(0.0)   | 0.0-0.9  | 3(0.7)  | 0.2-2.3 | 1(0.3)     | 0.0-1.7   |        |
|                               | Q4 | 325(99.1)  | 97.2-99.7 | 0(0.0)   | 0.0-1.1  | 2(0.6)  | 0.2-2.4 | 1(0.3)     | 0.0-2.1   |        |
|                               | Q5 | 252(98.8)  | 96.4-99.6 | 1(0.4)   | 0.0-2.7  | 3(1.2)  | 0.2-3.1 | 1(0.4)     | 0.0-1.4   |        |
| Egypt<br>2008                 | Q1 | 742(47.7)  | 45.2-50.2 | 151(9.7) | 8.3-11.3 | 3(0.2)  | 0.1-0.6 | 659(42.4)  | 40.0-44.9 | <0.001 |
|                               | Q2 | 915(64.4)  | 61.9-66.8 | 125(8.8) | 7.4-10.4 | 5(0.4)  | 0.1-0.8 | 376(26.5)  | 24.2-28.8 |        |
|                               | Q3 | 1089(76.7) | 74.4-78.8 | 115(8.1) | 6.8-9.6  | 2(0.1)  | 0.0-0.6 | 214(15.1)  | 13.3-17.0 |        |

|                   |    |            |           |         |         |         |          |            |           |        |
|-------------------|----|------------|-----------|---------|---------|---------|----------|------------|-----------|--------|
|                   | Q4 | 1086(84.9) | 82.8-86.8 | 82(6.4) | 5.2-7.9 | 5(0.4)  | 0.2-0.9  | 106(8.3)   | 7.0-9.9   |        |
|                   | Q5 | 1143(95.2) | 93.8-96.2 | 28(2.3) | 1.6-3.4 | 1(0.1)  | 0.0-0.6  | 29(2.4)    | 1.7-3.4   |        |
| Ethiopia<br>2011  | Q1 | 71(3.5)    | 2.8-4.4   | 6(0.3)  | 0.1-0.7 | 3(0.2)  | 0.0-0.5  | 1950(96.1) | 95.1-96.9 | <0.001 |
|                   | Q2 | 43(3.6)    | 2.7-4.8   | 6(0.5)  | 0.2-1.1 | 3(0.3)  | 0.1-0.8  | 1144(95.7) | 94.3-96.7 |        |
|                   | Q3 | 44(4.0)    | 3.0-5.4   | 8(0.7)  | 0.4-1.5 | 2(0.2)  | 0.0-0.7  | 1041(95.1) | 93.6-96.2 |        |
|                   | Q4 | 92(8.5)    | 7.0-10.3  | 17(1.6) | 1.0-2.5 | 0(0.0)  | 0.0-0.3  | 971(89.9)  | 88.0-91.6 |        |
|                   | Q5 | 736(56.6)  | 53.9-59.3 | 22(1.7) | 1.1-2.6 | 3(0.2)  | 0.1-0.7  | 539(41.5)  | 38.8-44.2 |        |
| Gabon<br>2012     | Q1 | 1260(69.7) | 67.5-71.7 | 17(0.9) | 0.6-1.5 | 17(0.9) | 0.6-1.5  | 515(28.5)  | 26.4-30.6 | <0.001 |
|                   | Q2 | 780(91.0)  | 88.9-92.8 | 6(0.7)  | 0.3-1.6 | 5(0.6)  | 0.2-1.4  | 66(7.7)    | 6.1-9.7   |        |
|                   | Q3 | 493(93.6)  | 91.1-95.4 | 8(1.5)  | 0.8-3.0 | 5(1.0)  | 0.4-2.3  | 21(4.0)    | 2.6-6.0   |        |
|                   | Q4 | 371(93.7)  | 90.8-95.7 | 6(1.5)  | 0.7-3.3 | 2(0.5)  | 0.1-2.0  | 17(4.3)    | 2.7-6.8   |        |
|                   | Q5 | 264(96.4)  | 93.3-98.0 | 0(0.0)  | 0.0-1.3 | 3(1.1)  | 0.4-3.3  | 7(2.6)     | 1.2-5.3   |        |
| Gambia<br>2013    | Q1 | 547(43.5)  | 40.8-46.2 | 14(1.1) | 0.7-1.9 | 67(5.3) | 4.2-6.7  | 630(50.1)  | 47.3-52.8 | <0.001 |
|                   | Q2 | 571(42.6)  | 40.0-45.3 | 19(1.4) | 0.9-2.2 | 76(5.7) | 4.6-7.0  | 674(50.3)  | 47.6-53.0 |        |
|                   | Q3 | 472(43.5)  | 40.6-46.5 | 9(0.8)  | 0.4-1.6 | 69(6.4) | 5.1-8.0  | 534(49.3)  | 46.3-52.2 |        |
|                   | Q4 | 555(68.4)  | 65.1-71.5 | 2(0.3)  | 0.1-1.0 | 51(6.3) | 4.8-8.2  | 203(25.0)  | 22.2-28.1 |        |
|                   | Q5 | 543(84.2)  | 81.2-86.8 | 7(1.1)  | 0.5-2.3 | 51(7.9) | 6.1-10.3 | 44(6.8)    | 5.1-9.0   |        |
| Ghana<br>2011     | Q1 | 493(37.4)  | 34.8-40.0 | 14(1.1) | 0.1-1.8 | 8(0.6)  | 0.3-1.2  | 805(61.0)  | 58.3-63.6 | <0.001 |
|                   | Q2 | 305(52.6)  | 48.5-56.6 | 10(1.7) | 0.9-3.2 | 7(1.2)  | 0.6-2.5  | 258(44.5)  | 40.5-48.6 |        |
|                   | Q3 | 269(68.5)  | 63.7-72.9 | 6(1.5)  | 0.7-3.4 | 2(0.5)  | 0.1-2.0  | 116(29.5)  | 25.2-34.2 |        |
|                   | Q4 | 266(82.9)  | 78.3-86.6 | 5(1.6)  | 0.6-3.7 | 0(0.0)  | 0.0-1.1  | 50(15.6)   | 12.0-20.0 |        |
|                   | Q5 | 250(96.5)  | 93.4-98.2 | 1(0.4)  | 0.1-2.7 | 0(0.0)  | 0.0-1.4  | 8(3.1)     | 1.5-6.1   |        |
| Guatemala<br>2008 | Q1 | 448(23.0)  | 21.2-24.8 | 5(0.2)  | 0.1-0.5 | 4(0.2)  | 0.1-0.5  | 1626(76.6) | 74.7-78.3 | <0.001 |
|                   | Q2 | 639(41.5)  | 39.0-43.9 | 14(0.9) | 0.5-1.5 | 11(0.7) | 0.4-1.3  | 877(56.9)  | 54.4-59.4 |        |
|                   | Q3 | 797(65.3)  | 62.6-67.9 | 6(0.5)  | 0.2-1.1 | 4(0.3)  | 0.1-0.9  | 414(33.9)  | 31.3-36.6 |        |
|                   | Q4 | 946(87.6)  | 85.5-89.4 | 4(0.4)  | 0.1-1.0 | 6(0.6)  | 0.2-1.2  | 124(11.5)  | 9.7-13.5  |        |
|                   | Q5 | 514(95.36) | 93.2-96.8 | 4(0.7)  | 0.3-2.0 | 2(0.4)  | 0.1-1.5  | 19(3.5)    | 2.3-5.5   |        |

|                   |    |            |           |           |           |         |         |            |           |        |
|-------------------|----|------------|-----------|-----------|-----------|---------|---------|------------|-----------|--------|
| Guinea<br>2012    | Q1 | 179(17.6)  | 15.3-20.0 | 19(1.9)   | 1.2-2.9   | 10(1.0) | 0.5-1.8 | 812(79.6)  | 77.0-82.0 | <0.001 |
|                   | Q2 | 193(1.9)   | 20.4-26.1 | 34(4.1)   | 2.9-5.6   | 27(3.2) | 2.2-4.7 | 582(69.6)  | 66.4-72.6 |        |
|                   | Q3 | 286(33.0)  | 30.0-36.2 | 49(5.7)   | 4.3-7.4   | 20(2.3) | 1.5-3.6 | 511(59.0)  | 55.7-62.2 |        |
|                   | Q4 | 482(52.5)  | 49.3-55.7 | 134(14.6) | 12.5-17.0 | 8(0.9)  | 0.4-1.7 | 294(32.0)  | 29.1-35.1 |        |
|                   | Q5 | 484(81.3)  | 78.0-84.3 | 65(10.9)  | 8.7-13.7  | 2(0.3)  | 0.1-1.3 | 44(7.4)    | 5.5-9.8   |        |
| Guyana<br>2009    | Q1 | 370(61.6)  | 57.6-65.4 | 64(10.7)  | 8.4-13.4  | 4(0.7)  | 0.2-1.8 | 163(27.1)  | 23.7-30.8 | <0.001 |
|                   | Q2 | 211(91.3)  | 86.9-94.4 | 6(2.6)    | 1.2-5.7   | 2(0.9)  | 0.2-3.4 | 12(5.2)    | 3.0-8.9   |        |
|                   | Q3 | 228(94.2)  | 90.5-96.5 | 4(1.7)    | 0.6-4.3   | 6(2.5)  | 1.1-5.4 | 4(1.7)     | 0.6-4.3   |        |
|                   | Q4 | 172(93.5)  | 88.8-96.3 | 7(3.8)    | 1.8-7.8   | 0(0.0)  | 0.0-2.0 | 5(2.7)     | 1.1-6.4   |        |
|                   | Q5 | 139(93.3)  | 87.9-96.4 | 4(2.7)    | 1.0-7.0   | 0(0.0)  | 0.0-2.5 | 6(4.0)     | 1.8-6.7   |        |
| Haiti<br>2012     | Q1 | 134(10.8)  | 9.2-12.7  | 11(1.0)   | 0.5-1.6   | 3(0.2)  | 0.1-0.7 | 1093(88.1) | 86.1-89.8 | <0.001 |
|                   | Q2 | 219(21.8)  | 19.3-24.4 | 12(1.2)   | 0.7-2.1   | 6(0.6)  | 0.3-1.3 | 769(76.4)  | 73.7-79.0 |        |
|                   | Q3 | 440(41.5)  | 38.6-44.5 | 14(1.3)   | 0.8-2.2   | 6(0.6)  | 0.3-1.3 | 600(56.6)  | 53.6-59.6 |        |
|                   | Q4 | 408(54.3)  | 50.7-57.9 | 28(3.7)   | 2.6-5.3   | 2(0.3)  | 0.1-1.1 | 313(41.7)  | 38.2-45.2 |        |
|                   | Q5 | 381(79.1)  | 75.2-82.5 | 12(2.5)   | 1.4-4.3   | 0(0.0)  | 0.0-0.8 | 89(18.5)   | 15.2-22.2 |        |
| Honduras<br>2011  | Q1 | 1297(59.1) | 57.1-61.2 | 16(0.7)   | 0.4-1.2   | 10(0.5) | 0.2-0.8 | 870(39.7)  | 37.6-41.7 | <0.001 |
|                   | Q2 | 1281(81.8) | 79.8-83.6 | 3(0.2)    | 0.1-0.6   | 2(0.1)  | 0.0-0.5 | 281(17.9)  | 16.1-19.9 |        |
|                   | Q3 | 1099(90.2) | 88.4-91.8 | 2(0.2)    | 0.0-0.7   | 4(0.3)  | 0.1-0.9 | 113(9.3)   | 7.8-11.0  |        |
|                   | Q4 | 984(96.9)  | 95.6-97.8 | 1(0.1)    | 0.0-0.7   | 0(0.0)  | 0.0-0.4 | 31(3.1)    | 2.2-4.3   |        |
|                   | Q5 | 713(97.7)  | 96.3-98.5 | 6(0.8)    | 0.4-1.8   | 2(0.3)  | 0.1-1.1 | 9(1.2)     | 0.6-2.4   |        |
| India<br>2005     | Q1 | 703(13.2)  | 12.3-14.1 | 395(7.4)  | 6.7-8.2   | 11(0.2) | 0.1-0.4 | 4215(79.2) | 78.1-80.2 | <0.001 |
|                   | Q2 | 1350(23.9) | 22.8-25.1 | 488(8.7)  | 7.9-9.4   | 13(0.2) | 0.1-0.4 | 3787(67.2) | 65.9-68.4 |        |
|                   | Q3 | 2542(40.7) | 39.5-42.0 | 621(10.0) | 9.2-10.7  | 26(0.4) | 0.3-0.6 | 3052(48.9) | 47.7-50.1 |        |
|                   | Q4 | 4086(60.6) | 59.4-61.7 | 633(9.4)  | 8.7-10.1  | 18(0.3) | 0.2-0.4 | 2010(29.8) | 28.7-30.9 |        |
|                   | Q5 | 5496(85.2) | 84.3-86.0 | 308(4.8)  | 4.3-5.3   | 21(0.3) | 0.2-0.5 | 627(9.7)   | 9.0-10.5  |        |
| Indonesia<br>2012 | Q1 | 866(26.4)  | 24.9-27.9 | 960(29.2) | 27.7-30.8 | 6(0.2)  | 0.1-0.4 | 1453(44.2) | 42.5-45.9 | <0.001 |
|                   | Q2 | 1223(55.0) | 52.9-57.0 | 625(28.1) | 26.3-30.0 | 5(0.2)  | 0.1-0.5 | 372(16.7)  | 15.2-18.3 |        |

|                    |    |            |            |           |           |         |         |            |           |        |
|--------------------|----|------------|------------|-----------|-----------|---------|---------|------------|-----------|--------|
|                    | Q3 | 1326(67.0) | 64.9-69.1  | 478(24.2) | 22.3-26.1 | 2(0.1)  | 0.0-0.4 | 172(8.7)   | 7.5-10.0  |        |
|                    | Q4 | 1473(79.8) | 77.9-81.6  | 303(16.4) | 14.8-18.2 | 1(0.1)  | 0.0-0.4 | 69(3.7)    | 3.0-4.7   |        |
|                    | Q5 | 1388(88.0) | 86.3-89.5  | 152(9.6)  | 8.3-11.2  | 4(0.3)  | 0.1-0.7 | 34(2.2)    | 1.5-3.0   |        |
| Iraq<br>2011       | Q1 | 2902(63.3) | 61.9-64.6  | 652(14.2) | 13.2-15.3 | 11(0.2) | 0.1-0.4 | 1022(22.3) | 21.1-23.5 | <0.001 |
|                    | Q2 | 2411(73.9) | 72.4-75.4  | 473(14.5) | 13.3-15.7 | 26(0.8) | 0.5-1.2 | 353(10.8)  | 9.8-11.9  |        |
|                    | Q3 | 2063(78.1) | 76.5-79.7  | 378(14.3) | 13.0-15.7 | 21(0.8) | 0.5-1.2 | 179(6.8)   | 5.9-7.8   |        |
|                    | Q4 | 1641(81.2) | 79.5-82.9  | 258(12.8) | 11.4-14.3 | 8(0.4)  | 0.2-0.8 | 113(5.6)   | 4.7-6.7   |        |
|                    | Q5 | 1244(83.9) | 81.9-85.7  | 177(11.9) | 10.4-13.7 | 5(0.3)  | 0.1-0.8 | 57(3.8)    | 3.0-5.0   |        |
| Jamaica<br>2011    | Q1 | 148(94.9)  | 90.0-97.4  | 4(2.6)    | 1.0-6.7   | 0(0.0)  | 0.0-2.3 | 4(2.6)     | 0.1-6.7   | 0.015  |
|                    | Q2 | 139(99.3)  | 95.1-99.9  | 0(0.0)    | 0.0-2.6   | 1(0.7)  | 0.1-4.9 | 0(0.0)     | 0.0-2.6   |        |
|                    | Q3 | 133(100.0) | 97.3-100.0 | 0(0.0)    | 0.0-2.7   | 0(0.0)  | 0.0-2.7 | 0(0.0)     | 0.0-2.7   |        |
|                    | Q4 | 105(99.1)  | 93.3-99.9  | 1(0.9)    | 0.1-6.5   | 0(0.0)  | 0.0-3.4 | 0(0.0)     | 0.0-3.4   |        |
|                    | Q5 | 95(100.0)  | 96.2-100.0 | 0(0.0)    | 0.0-3.8   | 0(0.0)  | 0.0-3.8 | 0(0.0)     | 0.0-3.8   |        |
| Jordan<br>2012     | Q1 | 1601(98.2) | 87.4-98.7  | 19(1.2)   | 0.7-1.8   | 1(0.1)  | 0.0-0.4 | 10(0.6)    | 0.3-1.1   | <0.001 |
|                    | Q2 | 1648(99.6) | 99.2-99.8  | 5(0.3)    | 0.1-0.7   | 0(0.0)  | 0.0-0.2 | 1(0.1)     | 0.0-0.4   |        |
|                    | Q3 | 1386(99.6) | 99.0-99.8  | 6(0.4)    | 0.2-1.0   | 0(0.0)  | 0.0-0.3 | 0(0.0)     | 0.0-0.3   |        |
|                    | Q4 | 993(99.5)  | 98.8-99.8  | 1(0.1)    | 0.0-0.7   | 0(0.0)  | 0.0-0.4 | 4(0.4)     | 0.2-1.1   |        |
|                    | Q5 | 442(100.0) | 99.2-100.0 | 0(0.0)    | 0.0-0.8   | 0(0.0)  | 0.0-0.8 | 0(0.0)     | 0.0-0.8   |        |
| Kazakhstan<br>2010 | Q1 | 380(98.7)  | 96.9-99.5  | 3(0.8)    | 0.3-2.4   | 0(0.0)  | 0.0-1.0 | 2(0.5)     | 0.1-2.1   | 0.066  |
|                    | Q2 | 423(99.8)  | 98.3-100.0 | 1(0.2)    | 0.0-1.7   | 0(0.0)  | 0.0-0.9 | 0(0.0)     | 0.0-0.9   |        |
|                    | Q3 | 429(99.8)  | 98.4-100.0 | 0(0.0)    | 0.0-0.9   | 0(0.0)  | 0.0-0.9 | 1(0.2)     | 0.0-1.6   |        |
|                    | Q4 | 374(100.0) | 99.0-100.0 | 0(0.0)    | 0.0-1.0   | 0(0.0)  | 0.0-1.0 | 0(0.0)     | 0.0-1.0   |        |
|                    | Q5 | 414(100.0) | 99.1-100.0 | 0(0.0)    | 0.0-0.9   | 0(0.0)  | 0.0-0.9 | 0(0.0)     | 0.0-0.9   |        |
| Kenya<br>2008      | Q1 | 184(17.2)  | 15.0-19.5  | 49(4.6)   | 3.5-6.0   | 0(0.0)  | 0.0-0.3 | 839(78.3)  | 75.7-80.6 | <0.001 |
|                    | Q2 | 210(31.3)  | 27.9-34.9  | 12(1.8)   | 1.0-3.1   | 1(0.2)  | 0.0-1.1 | 448(66.8)  | 63.1-70.2 |        |
|                    | Q3 | 270(43.9)  | 40.0-47.9  | 6(1.0)    | 0.4-2.2   | 1(0.2)  | 0.0-1.1 | 338(55.0)  | 51.0-58.9 |        |
|                    | Q4 | 333(56.0)  | 51.9-59.9  | 14(2.4)   | 1.4-3.9   | 2(0.3)  | 0.1-1.3 | 246(41.3)  | 37.4-45.4 |        |

|                    |    |            |            |         |          |         |         |            |           |        |
|--------------------|----|------------|------------|---------|----------|---------|---------|------------|-----------|--------|
|                    | Q5 | 633(81.2)  | 78.3-83.7  | 6(0.8)  | 0.3-1.7  | 2(0.3)  | 0.1-1.0 | 139(17.8)  | 15.3-20.7 |        |
| Kyrgyzstan<br>2012 | Q1 | 597(98.8)  | 97.6-99.4  | 3(0.5)  | 0.2-1.5  | 1(0.2)  | 0.0-1.2 | 3(0.5)     | 0.2-1.5   | 0.308  |
|                    | Q2 | 606(99.5)  | 98.5-99.4  | 2(0.3)  | 0.1-1.3  | 0(0.0)  | 0.0-0.6 | 1(0.2)     | 0.0-1.2   |        |
|                    | Q3 | 617(98.6)  | 97.3-99.3  | 3(0.5)  | 0.2-1.5  | 0(0.0)  | 0.0-0.6 | 6(1.0)     | 0.4-2.1   |        |
|                    | Q4 | 528(98.5)  | 97.0-99.3  | 1(0.2)  | 0.0-1.3  | 1(0.2)  | 0.0-1.3 | 6(1.1)     | 0.5-2.5   |        |
|                    | Q5 | 386(100.0) | 99.1-100.0 | 0(0.0)  | 0.0-1.0  | 0(0.0)  | 0.0-1.0 | 0(0.0)     | 0.0-1.0   |        |
| Lao<br>2011        | Q1 | 110(8.1)   | 6.7-9.6    | 17(1.2) | 0.8-2.0  | 18(1.3) | 0.8-2.1 | 1222(89.4) | 87.6-90.9 | <0.001 |
|                    | Q2 | 213(21.1)  | 18.7-23.7  | 30(3.0) | 2.1-4.2  | 3(0.3)  | 0.1-0.9 | 764(75.6)  | 72.9-78.2 |        |
|                    | Q3 | 325(38.3)  | 35.1-41.6  | 57(6.7) | 5.2-8.6  | 2(0.2)  | 0.1-0.9 | 464(54.7)  | 51.3-58.0 |        |
|                    | Q4 | 368(55.1)  | 51.3-58.8  | 57(8.5) | 6.6-10.9 | 0(0.0)  | 0.0-0.5 | 243(36.4)  | 32.8-40.1 |        |
|                    | Q5 | 480(87.1)  | 84.0-89.7  | 21(3.8) | 2.5-5.8  | 1(0.2)  | 0.0-1.3 | 49(9.0)    | 6.8-11.6  |        |
| Lesotho<br>2009    | Q1 | 277(36.9)  | 33.5-40.5  | 13(1.7) | 1.0-3.0  | 1(0.1)  | 0.0-0.9 | 459(61.2)  | 57.7-64.6 | <0.001 |
|                    | Q2 | 282(49.8)  | 45.7-53.9  | 18(3.2) | 2.0-5.0  | 1(0.2)  | 0.0-1.2 | 265(46.8)  | 42.7-50.9 |        |
|                    | Q3 | 263(55.3)  | 50.7-59.7  | 23(4.8) | 3.2-7.2  | 3(0.6)  | 0.2-1.9 | 187(39.3)  | 35.0-48.3 |        |
|                    | Q4 | 298(73.8)  | 69.2-77.8  | 13(3.2) | 1.9-5.5  | 2(0.5)  | 0.1-2.0 | 91(22.5)   | 18.7-26.9 |        |
|                    | Q5 | 280(89.2)  | 85.2-92.2  | 10(3.2) | 1.7-5.8  | 2(0.6)  | 0.2-2.5 | 22(7.0)    | 4.7-10.4  |        |
| Liberia<br>2013    | Q1 | 696(42.5)  | 40.1-44.9  | 58(3.5) | 2.7-4.6  | 32(2.0) | 1.4-2.7 | 853(52.0)  | 49.6-54.5 | <0.001 |
|                    | Q2 | 637(51.3)  | 48.5-54.1  | 67(5.4) | 4.3-6.8  | 29(2.3) | 1.6-3.3 | 509(41.0)  | 38.3-43.7 |        |
|                    | Q3 | 573(61.2)  | 58.0-64.2  | 53(5.7) | 4.3-7.3  | 23(2.5) | 1.6-3.7 | 288(30.7)  | 27.9-33.8 |        |
|                    | Q4 | 353(70.2)  | 66.0-74.0  | 40(8.0) | 5.9-10.7 | 6(1.2)  | 0.5-2.6 | 104(20.7)  | 17.4-24.4 |        |
|                    | Q5 | 224(81.8)  | 76.7-85.9  | 18(6.6) | 4.2-10.2 | 0(0.0)  | 0.0-1.3 | 32(11.68)  | 8.4-16.1  |        |
| Macedonia<br>2011  | Q1 | 89(95.7)   | 89.0-98.4  | 2(2.2)  | 0.5-8.3  | 0(0.0)  | 0.0-3.9 | 2(2.2)     | 0.5-8.3   | 0.198  |
|                    | Q2 | 96(97.00)  | 91.0-99.0  | 0(0.0)  | 0.0-3.7  | 1(1.0)  | 0.1-6.9 | 2(2.0)     | 0.5-7.8   |        |
|                    | Q3 | 106(99.1)  | 93.6-99.9  | 1(0.9)  | 0.1-6.4  | 0(0.0)  | 0.0-3.4 | 0(0.0)     | 0.0-3.4   |        |
|                    | Q4 | 104(100.0) | 96.5-100.0 | 0(0.0)  | 0.0-3.5  | 0(0.0)  | 0.0-3.5 | 0(0.0)     | 0.0-3.5   |        |
|                    | Q5 | 97(97.0)   | 91.0-99.0  | 1(1.0)  | 0.1-6.8  | 2(2.0)  | 0.5-7.7 | 0(0.0)     | 0.0-3.6   |        |
|                    | Q1 | 407(18.9)  | 17.3-20.6  | 92(4.3) | 3.5-5.2  | 3(0.1)  | 0.0-0.4 | 1657(76.8) | 74.9-78.5 | <0.001 |



|                    |    |            |            |           |           |         |         |            |           |        |
|--------------------|----|------------|------------|-----------|-----------|---------|---------|------------|-----------|--------|
| Madagascar<br>2008 | Q2 | 407(25.8)  | 23.7-28.0  | 74(4.7)   | 3.8-5.9   | 2(0.1)  | 0.0-0.5 | 1094(69.4) | 67.1-71.6 |        |
|                    | Q3 | 486(36.6)  | 34.0-39.2  | 89(6.7)   | 5.5-8.2   | 6(0.5)  | 0.2-1.0 | 748(56.3)  | 53.6-58.9 |        |
|                    | Q4 | 561(47.1)  | 44.3-49.9  | 162(13.6) | 11.8-15.7 | 1(0.1)  | 0.0-0.6 | 467(39.2)  | 36.5-42.0 |        |
|                    | Q5 | 778(67.1)  | 64.4-69.8  | 262(22.6) | 20.3-25.1 | 4(0.4)  | 0.1-0.9 | 115(9.9)   | 8.3-11.8  |        |
| Malawi<br>2010     | Q1 | 1799(64.6) | 62.8-66.4  | 13(0.5)   | 0.3-0.8   | 45(1.6) | 1.2-2.2 | 927(33.3)  | 31.6-35.1 | <0.001 |
|                    | Q2 | 1886(67.7) | 66.0-69.5  | 6(0.2)    | 0.1-0.5   | 67(2.4) | 1.9-3.0 | 825(29.6)  | 28.0-31.4 |        |
|                    | Q3 | 1933(70.6) | 68.9-72.3  | 12(0.4)   | 0.2-0.8   | 73(2.7) | 2.1-3.3 | 719(26.3)  | 24.7-28.0 |        |
|                    | Q4 | 1751(78.2) | 76.5-79.9  | 9(0.4)    | 0.2-0.8   | 59(2.6) | 2.0-3.4 | 419(18.7)  | 17.2-20.4 |        |
|                    | Q5 | 1415(88.8) | 87.2-90.3  | 8(0.5)    | 0.3-1.0   | 29(1.8) | 1.3-2.6 | 141(8.9)   | 7.6-10.3  |        |
| Maldives<br>2009   | Q1 | 484(92.0)  | 89.4-94.0  | 4(0.8)    | 0.3-2.0   | 14(2.7) | 1.6-4.4 | 24(4.6)    | 3.1-6.7   | <0.001 |
|                    | Q2 | 650(94.5)  | 92.5-96.0  | 4(0.6)    | 0.2-1.5   | 11(1.6) | 0.9-2.9 | 23(3.3)    | 2.2-5.0   |        |
|                    | Q3 | 627(96.3)  | 94.6-97.5  | 5(0.8)    | 0.3-1.8   | 6(0.9)  | 0.4-2.0 | 13(2.0)    | 1.2-3.4   |        |
|                    | Q4 | 366(97.9)  | 95.8-98.9  | 4(1.1)    | 0.4-2.8   | 1(0.3)  | 0.0-1.9 | 3(0.8)     | 0.3-2.5   |        |
|                    | Q5 | 198(97.1)  | 93.6-98.7  | 6(2.9)    | 1.3-6.4   | 0(0.0)  | 0.0-1.8 | 0(0.0)     | 0.0-1.8   |        |
| Mali<br>2012       | Q1 | 330(28.7)  | 26.2-31.4  | 87(7.6)   | 6.2-9.2   | 12(1.0) | 0.6-1.8 | 721(62.7)  | 59.9-65.4 | <0.001 |
|                    | Q2 | 475(39.6)  | 36.9-42.4  | 58(4.8)   | 3.8-6.2   | 15(1.3) | 0.8-2.1 | 651(54.3)  | 51.5-57.1 |        |
|                    | Q3 | 571(47.8)  | 45.0-50.7  | 41(3.4)   | 2.5-4.6   | 16(1.3) | 0.8-2.2 | 566(47.4)  | 44.6-50.2 |        |
|                    | Q4 | 873(74.2)  | 71.7-76.7  | 40(3.4)   | 2.5-4.6   | 7(0.6)  | 0.3-1.2 | 256(21.8)  | 19.5-24.2 |        |
|                    | Q5 | 1222(94.2) | 92.8-95.4  | 15(1.2)   | 0.7-1.9   | 10(0.8) | 0.4-1.4 | 50(3.9)    | 2.9-5.1   |        |
| Moldova<br>2012    | Q1 | 82(97.6)   | 90.9-99.4  | 0(0.0)    | 0.0-4.3   | 0(0.0)  | 0.0-4.3 | 2(2.4)     | 0.6-9.1   | 0.081  |
|                    | Q2 | 117(100.0) | 96.9-100.0 | 0(0.0)    | 0.0-3.1   | 0(0.0)  | 0.0-3.1 | 0(0.0)     | 0.0-3.1   |        |
|                    | Q3 | 115(100.0) | 96.8-100.0 | 0(0.0)    | 0.0-3.2   | 0(0.0)  | 0.0-3.2 | 0(0.0)     | 0.0-3.2   |        |
|                    | Q4 | 130(97.7)  | 93.2-99.3  | 2(1.5)    | 0.4-5.9   | 0(0.0)  | 0.0-2.7 | 1(0.8)     | 0.1-5.2   |        |
|                    | Q5 | 272(99.3)  | 97.1-99.8  | 0(0.0)    | 0.0-1.3   | 0(0.0)  | 0.0-1.3 | 2(0.7)     | 0.2-2.9   |        |
| Mongolia<br>2010   | Q1 | 481(97.0)  | 95.0-98.2  | 3(0.6)    | 0.2-1.9   | 0(0.0)  | 0.0-0.7 | 12(2.4)    | 1.4-4.2   | 0.069  |
|                    | Q2 | 382(98.5)  | 96.6-99.3  | 3(0.8)    | 0.2-2.4   | 1(0.3)  | 0.0-1.8 | 2(0.5)     | 0.1-2.0   |        |
|                    | Q3 | 316(98.8)  | 96.7-99.5  | 0(0.0)    | 0.0-1.2   | 1(0.3)  | 0.0-2.2 | 3(0.9)     | 0.3-2.9   |        |

|                    |    |            |            |         |         |         |         |            |           |        |
|--------------------|----|------------|------------|---------|---------|---------|---------|------------|-----------|--------|
|                    | Q4 | 250(99.6)  | 97.2-99.9  | 0(0.0)  | 0.0-1.5 | 1(0.4)  | 0.1-2.8 | 0(0.0)     | 0.0-1.5   |        |
|                    | Q5 | 233(99.2)  | 96.6-99.8  | 1(0.4)  | 0.1-3.0 | 0(0.0)  | 0.0-1.6 | 1(0.4)     | 0.1-3.0   |        |
| Montenegro<br>2013 | Q1 | 79(98.8)   | 91.5-99.8  | 0(0.0)  | 0.0-4.5 | 0(0.0)  | 0.0-4.5 | 1(1.3)     | 0.2-8.5   | 0.686  |
|                    | Q2 | 103(100.0) | 96.4-100.0 | 0(0.0)  | 0.0-3.5 | 0(0.0)  | 0.0-3.5 | 0(0.0)     | 0.0-3.5   |        |
|                    | Q3 | 100(99.0)  | 93.2-99.9  | 0(0.0)  | 0.0-3.6 | 0(0.0)  | 0.0-3.6 | 1(1.0)     | 0.1-6.8   |        |
|                    | Q4 | 104(99.1)  | 93.5-99.9  | 0(0.0)  | 0.0-3.5 | 0(0.0)  | 0.0-3.5 | 1(1.0)     | 0.1-6.5   |        |
|                    | Q5 | 105(100.0) | 96.6-100.0 | 0(0.0)  | 0.0-3.5 | 0(0.0)  | 0.0-3.5 | 0(0.0)     | 0.0-3.5   |        |
| Mozambique<br>2011 | Q1 | 422(34.7)  | 31.1-37.4  | 25(2.1) | 1.4-3.0 | 27(2.2) | 1.5-3.2 | 742(61.0)  | 58.2-63.7 | <0.001 |
|                    | Q2 | 560(42.1)  | 39.5-44.8  | 16(1.2) | 0.7-2.0 | 25(1.9) | 1.3-2.8 | 729(54.8)  | 52.1-57.5 |        |
|                    | Q3 | 751(54.4)  | 51.7-57.0  | 26(1.9) | 1.3-2.8 | 46(3.3) | 2.5-4.4 | 558(40.4)  | 37.8-43.6 |        |
|                    | Q4 | 1119(74.1) | 71.8-76.2  | 23(1.5) | 1.0-2.3 | 42(2.8) | 2.1-3.7 | 327(21.6)  | 19.6-23.8 |        |
|                    | Q5 | 1349(90.0) | 88.4-91.4  | 6(0.4)  | 0.2-0.9 | 42(2.8) | 2.1-3.8 | 102(6.8)   | 5.6-8.2   |        |
| Namibia<br>2013    | Q1 | 485(70.6)  | 67.1-73.9  | 14(2.0) | 1.2-3.4 | 2(0.3)  | 0.1-1.2 | 186(27.1)  | 23.9-30.5 | <0.001 |
|                    | Q2 | 588(83.8)  | 80.8-86.3  | 17(2.4) | 1.5-3.9 | 1(0.1)  | 0.0-1.0 | 96(13.7)   | 11.3-16.4 |        |
|                    | Q3 | 611(86.4)  | 83.7-88.8  | 10(1.4) | 1.8-2.6 | 4(0.6)  | 0.2-1.5 | 82(11.6)   | 9.4-14.2  |        |
|                    | Q4 | 624(94.8)  | 92.9-96.3  | 4(0.6)  | 0.2-1.6 | 4(0.6)  | 0.2-1.6 | 26(4.0)    | 2.7-5.7   |        |
|                    | Q5 | 397(97.5)  | 95.5-98.7  | 3(0.7)  | 0.2-2.3 | 0(0.0)  | 0.0-0.9 | 7(1.7)     | 0.8-3.6   |        |
| Nepal<br>2011      | Q1 | 137(14.5)  | 12.4-16.9  | 4(0.4)  | 0.2-1.1 | 15(1.6) | 1.0-2.6 | 788(83.5)  | 81.0-85.7 | <0.001 |
|                    | Q2 | 180(28.5)  | 25.1-32.1  | 4(0.6)  | 0.2-1.7 | 11(1.7) | 1.0-3.1 | 437(69.2)  | 65.4-72.6 |        |
|                    | Q3 | 250(44.7)  | 40.6-48.9  | 5(0.9)  | 0.4-2.1 | 13(2.3) | 1.4-4.0 | 291(52.1)  | 47.9-56.2 |        |
|                    | Q4 | 305(58.1)  | 53.8-62.3  | 18(3.4) | 2.2-5.4 | 8(1.5)  | 0.8-3.0 | 194(37.0)  | 32.9-41.2 |        |
|                    | Q5 | 378(85.5)  | 81.9-88.5  | 9(2.0)  | 1.1-3.9 | 1(0.2)  | 0.0-1.6 | 54(12.2)   | 9.5-15.6  |        |
| Niger<br>2012      | Q1 | 177(13.4)  | 11.6-15.3  | 5(0.4)  | 0.2-0.9 | 23(1.7) | 1.2-2.6 | 1121(84.5) | 82.5-86.4 | <0.001 |
|                    | Q2 | 276(20.9)  | 18.8-23.2  | 7(0.5)  | 0.3-1.1 | 23(1.7) | 1.2-2.6 | 1016(76.9) | 94.5-99.0 |        |
|                    | Q3 | 325(23.2)  | 21.0-25.4  | 10(0.7) | 0.4-1.3 | 18(1.3) | 0.8-2.0 | 1050(74.8) | 72.5-77.0 |        |
|                    | Q4 | 516(34.2)  | 31.9-36.7  | 15(1.0) | 0.6-1.6 | 17(1.1) | 0.7-1.8 | 960(63.7)  | 61.2-66.1 |        |
|                    | Q5 | 1539(78.7) | 76.8-80.4  | 19(0.5) | 0.6-1.5 | 9(0.5)  | 0.2-0.9 | 389(19.9)  | 18.2-21.7 |        |

|                     |    |            |           |           |           |          |         |            |           |        |
|---------------------|----|------------|-----------|-----------|-----------|----------|---------|------------|-----------|--------|
| Nigeria<br>2013     | Q1 | 249(6.1)   | 5.4-6.8   | 30(0.7)   | 0.5-1.0   | 45(1.1)  | 0.8-1.5 | 3777(92.1) | 91.2-92.9 | <0.001 |
|                     | Q2 | 741(16.8)  | 15.7-17.9 | 89(2.0)   | 1.6-2.5   | 131(3.0) | 2.5-3.5 | 3462(78.3) | 77.0-79.5 |        |
|                     | Q3 | 1376(36.5) | 34.9-38.0 | 172(4.6)  | 3.9-5.3   | 103(2.7) | 2.3-3.3 | 2122(56.2) | 54.7-57.8 |        |
|                     | Q4 | 1977(56.4) | 54.8-58.1 | 228(6.5)  | 5.7-7.4   | 61(1.7)  | 1.4-2.2 | 1237(35.3) | 33.7-36.9 |        |
|                     | Q5 | 2470(80.5) | 79.0-81.8 | 179(5.8)  | 5.1-6.7   | 26(0.9)  | 0.6-1.2 | 394(12.8)  | 11.7-14.1 |        |
| Pakistan<br>2012    | Q1 | 412(26.6)  | 24.5-28.9 | 48(3.1)   | 2.3-4.1   | 7(0.5)   | 0.2-0.9 | 1082(69.9) | 67.5-72.1 | <0.001 |
|                     | Q2 | 582(42.2)  | 39.6-44.8 | 67(4.9)   | 3.8-6.1   | 7(0.5)   | 0.2-1.1 | 724(52.5)  | 49.8-55.1 |        |
|                     | Q3 | 684(51.3)  | 48.6-54.0 | 71(5.3)   | 4.2-6.7   | 8(0.6)   | 0.3-1.2 | 570(42.8)  | 40.1-45.4 |        |
|                     | Q4 | 856(66.5)  | 63.8-69.0 | 65(5.1)   | 4.0-6.4   | 6(0.5)   | 0.2-1.0 | 361(28.0)  | 25.6-30.5 |        |
|                     | Q5 | 1103(84.9) | 82.9-86.8 | 30(2.3)   | 1.6-3.3   | 8(0.6)   | 0.3-1.2 | 158(12.2)  | 10.5-14.1 |        |
| Peru<br>2012        | Q1 | 967(58.8)  | 56.4-61.2 | 40(4.9)   | 3.9-6.0   | 24(1.5)  | 1.0-2.2 | 573(34.9)  | 32.6-37.2 | <0.001 |
|                     | Q2 | 1369(86.8) | 85.0-88.4 | 38(2.4)   | 1.8-3.3   | 12(0.8)  | 0.4-1.3 | 158(10.0)  | 8.6-11.6  |        |
|                     | Q3 | 1140(95.7) | 94.4-96.7 | 15(1.3)   | 0.8-2.1   | 0(0.0)   | 0.0-0.3 | 36(3.0)    | 2.2-4.2   |        |
|                     | Q4 | 777(98.7)  | 97.7-99.3 | 5(0.6)    | 0.3-1.5   | 1(0.1)   | 0.0-0.9 | 4(0.5)     | 0.2-1.3   |        |
|                     | Q5 | 504(99.0)  | 97.7-99.6 | 4(0.8)    | 0.3-2.1   | 0(0.0)   | 0.0-0.7 | 1(0.2)     | 0.0-1.4   |        |
| Philippines<br>2013 | Q1 | 481(35.9)  | 33.3-38.5 | 102(7.6)  | 6.3-9.2   | 1(0.1)   | 0.0-0.5 | 757(56.5)  | 53.8-59.1 | <0.001 |
|                     | Q2 | 550(58.8)  | 55.6-61.9 | 119(12.7) | 10.7-15.0 | 1(0.1)   | 0.0-0.8 | 265(28.3)  | 25.5-31.3 |        |
|                     | Q3 | 612(73.3)  | 70.2-76.2 | 96(11.5)  | 9.5-13.8  | 2(0.2)   | 0.1-1.0 | 125(15.0)  | 12.7-17.6 |        |
|                     | Q4 | 583(86.9)  | 84.1-89.2 | 49(7.3)   | 5.6-9.5   | 3(0.5)   | 0.1-1.4 | 36(5.4)    | 3.9-7.4   |        |
|                     | Q5 | 443(93.3)  | 90.6-95.2 | 18(3.8)   | 2.4-5.9   | 0(0.0)   | 0.0-0.8 | 14(3.0)    | 1.8-4.9   |        |
| Rwanda<br>2010      | Q1 | 858(69.6)  | 67.0-72.1 | 4(0.3)    | 0.1-0.9   | 5(0.4)   | 0.2-1.0 | 365(29.6)  | 27.1-32.2 | <0.001 |
|                     | Q2 | 809(71.5)  | 68.8-74.1 | 4(0.4)    | 0.1-0.9   | 2(0.2)   | 0.0-0.7 | 316(27.94) | 25.4-30.6 |        |
|                     | Q3 | 757(75.0)  | 72.2-77.5 | 3(0.3)    | 0.1-0.9   | 4(0.2)   | 0.1-1.1 | 246(24.4)  | 21.8-27.1 |        |
|                     | Q4 | 750(80.7)  | 78.1-83.1 | 3(0.3)    | 0.1-1.0   | 2(0.2)   | 0.1-0.9 | 174(18.7)  | 16.3-21.4 |        |
|                     | Q5 | 812(90.5)  | 88.4-92.3 | 5(0.6)    | 0.2-1.3   | 4(0.5)   | 0.2-1.2 | 76(8.5)    | 6.8-10.5  |        |
|                     | Q1 | 201(70.8)  | 65.2-75.8 | 15(5.3)   | 3.2-8.6   | 0(0.0)   | 0.0-1.3 | 68(23.9)   | 19.3-29.3 | <0.001 |
|                     | Q2 | 215(72.9)  | 67.5-77.7 | 11(3.7)   | 2.1-6.6   | 1(0.3)   | 0.0-2.4 | 68(23.1)   | 18.6-28.2 |        |

|                               |    |            |            |           |          |           |           |           |           |        |
|-------------------------------|----|------------|------------|-----------|----------|-----------|-----------|-----------|-----------|--------|
| São Tome & Principe<br>2008   | Q3 | 200(79.7)  | 74.2-84.2  | 6(2.4)    | 1.1-5.2  | 0(0.0)    | 0.0-1.5   | 45(17.9)  | 13.6-23.2 |        |
|                               | Q4 | 190(86.4)  | 81.1-90.3  | 5(2.3)    | 0.9-5.4  | 2(0.9)    | 0.2-3.6   | 23(10.5)  | 7.0-15.3  |        |
|                               | Q5 | 133(88.1)  | 81.8-92.4  | 7(4.6)    | 2.2-9.4  | 1(0.7)    | 0.1-4.6   | 10(6.6)   | 3.6-11.9  |        |
| Senegal<br>2014               | Q1 | 421(30.1)  | 27.7-32.6  | 12(0.9)   | 0.5-1.5  | 239(17.1) | 15.2-19.1 | 727(52.0) | 49.3-54.6 | <0.001 |
|                               | Q2 | 497(44.8)  | 41.9-47.7  | 7(0.6)    | 0.3-1.3  | 265(23.9) | 21.5-26.5 | 341(30.7) | 28.1-33.5 |        |
|                               | Q3 | 533(64.7)  | 61.4-67.9  | 7(0.9)    | 0.4-1.8  | 194(23.5) | 20.8-26.6 | 90(10.9)  | 9.0-13.2  |        |
|                               | Q4 | 377(79.2)  | 75.3-82.6  | 5(1.1)    | 0.4-2.5  | 66(13.9)  | 11.0-17.3 | 28(5.9)   | 4.1-8.4   |        |
|                               | Q5 | 263(80.7)  | 76.0-84.6  | 7(2.2)    | 1.0-4.4  | 48(14.7)  | 11.3-19.0 | 8(2.5)    | 1.2-4.8   |        |
| Serbia<br>2014                | Q1 | 133(97.1)  | 92.4-98.9  | 0(0.0)    | 0.0-2.7  | 0(0.0)    | 0.0-2.7   | 4(2.9)    | 1.1-7.6   | 0.106  |
|                               | Q2 | 159(100.0) | 97.7-100.0 | 0(0.0)    | 0.0-2.3  | 0(0.0)    | 0.0-2.3   | 0(0.0)    | 0.0-2.3   |        |
|                               | Q3 | 196(99.5)  | 96.5-99.9  | 1(0.5)    | 0.1-3.5  | 0(0.0)    | 0.0-1.9   | 0(0.0)    | 0.0-1.9   |        |
|                               | Q4 | 209(99.5)  | 96.7-99.9  | 0(0.0)    | 0.0-1.7  | 0(0.0)    | 0.0-1.7   | 1(0.5)    | 0.1-3.3   |        |
|                               | Q5 | 252(98.4)  | 95.9-99.4  | 1(0.4)    | 0.1-2.7  | 0(0.0)    | 0.0-1.4   | 3(1.2)    | 0.4-3.6   |        |
| Sierra Leone<br>2013          | Q1 | 814(49.6)  | 47.2-52.0  | 62(3.8)   | 3.0-4.8  | 17(1.0)   | 0.6-1.7   | 748(45.6) | 43.2-48.0 | <0.001 |
|                               | Q2 | 737(52.1)  | 49.4-54.6  | 48(3.4)   | 2.6-4.5  | 14(1.0)   | 0.6-1.7   | 617(43.6) | 41.0-46.2 |        |
|                               | Q3 | 774(53.2)  | 50.6-55.7  | 73(5.0)   | 4.0-6.3  | 9(0.6)    | 0.3-1.2   | 600(41.2) | 38.7-43.8 |        |
|                               | Q4 | 1019(66.0) | 63.6-68.3  | 125(8.1)  | 6.8-9.6  | 11(0.7)   | 0.4-1.3   | 390(25.2) | 23.1-27.5 |        |
|                               | Q5 | 786(75.8)  | 73.1-78.3  | 112(10.8) | 9.1-12.8 | 7(0.7)    | 0.3-1.4   | 132(12.7) | 10.8-14.9 |        |
| St Lucia<br>2012              | Q1 | 20(95.24)  | 71.3-79.4  | 0(0.0)    | 0.0-16.1 | 1(4.76)   | 0.6-28.7  | 0(0.0)    | 0.0-16.1  | 0.447  |
|                               | Q2 | 26(100.0)  | 86.8-100.0 | 0(0.0)    | 0.0-13.2 | 0(0.0)    | 0.0-13.2  | 0(0.0)    | 0.0-13.2  |        |
|                               | Q3 | 22(100.0)  | 84.6-100.0 | 0(0.0)    | 0.0-15.4 | 0(0.0)    | 0.0-15.4  | 0(0.0)    | 0.0-15.4  |        |
|                               | Q4 | 17(100.0)  | 80.5-100.0 | 0(0.0)    | 0.0-19.5 | 0(0.0)    | 0.0-19.5  | 0(0.0)    | 0.0-19.5  |        |
|                               | Q5 | 12(100.0)  | 73.5-100.0 | 0(0.0)    | 0.0-26.5 | 0(0.0)    | 0.0-26.5  | 0(0.0)    | 0.0-26.5  |        |
| State of<br>Palestine<br>2010 | Q1 | 965(97.7)  | 96.5-98.4  | 11(1.1)   | 0.6-2.0  | 4(0.4)    | 0.2-1.1   | 8(0.8)    | 0.4-1.6   | 0.086  |
|                               | Q2 | 1020(98.0) | 96.9-98.7  | 18(1.7)   | 1.1-2.7  | 0(0.0)    | 0.0-0.4   | 3(0.3)    | 0.1-0.9   |        |
|                               | Q3 | 896(98.3)  | 98.0-99.4  | 5(0.6)    | 0.2-1.3  | 1(0.1)    | 0.0-0.8   | 4(0.4)    | 0.2-1.2   |        |
|                               | Q4 | 810(98.3)  | 97.2-99.0  | 11(1.3)   | 0.7-2.4  | 1(0.1)    | 0.0-0.9   | 2(0.2)    | 0.1-1.0   |        |

|                     |    |            |           |           |           |           |           |            |           |        |
|---------------------|----|------------|-----------|-----------|-----------|-----------|-----------|------------|-----------|--------|
|                     | Q5 | 562(98.4)  | 97.0-99.2 | 7(1.2)    | 0.6-2.6   | 2(0.4)    | 0.1-1.4   | 0(0.0)     | 0.0-0.6   |        |
| Suriname<br>2010    | Q1 | 473(73.3)  | 69.8-76.6 | 49(7.6)   | 5.8-9.9   | 75(11.6)  | 9.4-14.3  | 48(7.4)    | 5.7-9.7   | <0.001 |
|                     | Q2 | 194(90.20) | 85.5-93.6 | 8(3.7)    | 1.9-7.3   | 7(3.3)    | 1.6-6.7   | 6(2.8)     | 1.3-6.1   |        |
|                     | Q3 | 159(94.1)  | 89.3-96.8 | 7(4.1)    | 2.0-8.5   | 2(1.2)    | 0.3-4.6   | 1(0.6)     | 0.1-4.1   |        |
|                     | Q4 | 127(96.2)  | 81.2-98.4 | 3(2.3)    | 0.7-6.8   | 1(0.8)    | 0.1-5.2   | 1(0.8)     | 0.1-5.2   |        |
|                     | Q5 | 100(96.2)  | 90.1-98.6 | 1(1.0)    | 0.1-6.6   | 2(2.0)    | 0.5-7.4   | 1(1.0)     | 0.1-6.6   |        |
| Swaziland<br>2010   | Q1 | 125(62.3)  | 55.3-68.6 | 2(1.0)    | 0.2-3.9   | 3(1.5)    | 0.5-4.5   | 71(35.3)   | 29.0-42.2 | <0.001 |
|                     | Q2 | 141(74.2)  | 67.5-80.0 | 4(2.1)    | 0.8-5.5   | 4(2.1)    | 0.8-5.5   | 41(21.5)   | 16.3-28.0 |        |
|                     | Q3 | 185(84.5)  | 79.0-88.7 | 4(1.8)    | 0.7-4.8   | 1(0.5)    | 0.1-3.2   | 29(13.2)   | 9.3-18.4  |        |
|                     | Q4 | 173(85.2)  | 79.6-89.5 | 7(3.5)    | 1.6-7.1   | 3(1.5)    | 0.5-4.5   | 20(9.9)    | 6.4-14.8  |        |
|                     | Q5 | 188(91.7)  | 87.0-94.8 | 4(2.0)    | 0.7-5.1   | 1(0.5)    | 0.1-3.4   | 12(5.9)    | 3.3-10.0  |        |
| Tajikistan<br>2012  | Q1 | 325(58.9)  | 54.7-62.9 | 91(16.5)  | 13.6-19.8 | 3(0.5)    | 0.2-1.7   | 133(24.1)  | 20.7-27.8 | <0.001 |
|                     | Q2 | 424(69.2)  | 65.4-72.7 | 104(17.0) | 14.2-20.2 | 2(0.3)    | 0.1-1.3   | 83(13.5)   | 11.0-16.5 |        |
|                     | Q3 | 503(78.7)  | 75.4-81.7 | 84(13.2)  | 10.7-16.0 | 2(0.3)    | 0.1-1.2   | 50(7.8)    | 6.0-10.0  |        |
|                     | Q4 | 557(88.6)  | 85.8-90.8 | 33(5.3)   | 3.8-7.3   | 4(0.6)    | 0.2-1.7   | 35(5.6)    | 4.0-7.7   |        |
|                     | Q5 | 697(91.5)  | 89.3-93.3 | 40(5.3)   | 3.9-7.1   | 2(0.3)    | 0.1-1.0   | 23(3.0)    | 2.0-4.5   |        |
| Tanzania<br>2010    | Q1 | 292(30.3)  | 27.5-33.3 | 5(0.5)    | 0.2-1.2   | 8(0.8)    | 0.4-1.7   | 658(68.3)  | 65.3-71.2 | <0.001 |
|                     | Q2 | 396(35.9)  | 33.1-38.8 | 13(1.2)   | 0.7-2.0   | 14(1.3)   | 0.8-2.1   | 680(61.7)  | 58.7-64.5 |        |
|                     | Q3 | 459(44.7)  | 41.7-47.8 | 17(1.7)   | 1.0-2.7   | 6(0.6)    | 0.3-1.3   | 544(53.0)  | 50.0-56.1 |        |
|                     | Q4 | 567(57.3)  | 54.2-60.4 | 20(2.0)   | 1.3-3.1   | 2(0.2)    | 0.1-0.8   | 400(40.4)  | 37.4-43.5 |        |
|                     | Q5 | 612(81.4)  | 78.4-84.0 | 26(3.5)   | 2.4-5.0   | 4(0.5)    | 0.2-1.4   | 110(14.6)  | 12.3-17.4 |        |
| Timor Leste<br>2009 | Q1 | 94(6.7)    | 5.5-8.1   | 79(5.6)   | 4.5-6.9   | 2(0.1)    | 0.0-0.6   | 1238(87.6) | 85.8-89.2 | <0.001 |
|                     | Q2 | 104(8.7)   | 7.2-10.4  | 85(7.1)   | 5.8-8.7   | 2(0.2)    | 0.0-0.7   | 1011(84.1) | 81.9-86.1 |        |
|                     | Q3 | 204(16.0)  | 14.1-18.1 | 119(9.3)  | 7.8-11.0  | 2(0.2)    | 0.0-0.6   | 953(74.6)  | 72.1-76.9 |        |
|                     | Q4 | 340(29.6)  | 27.0-32.3 | 119(10.4) | 8.7-12.3  | 2(0.2)    | 0.0-0.7   | 687(59.8)  | 57.0-62.6 |        |
|                     | Q5 | 503(58.2)  | 54.8-61.4 | 97(11.2)  | 9.3-13.5  | 1(0.1)    | 0.0-0.8   | 264(30.5)  | 27.5-33.7 |        |
|                     | Q1 | 341(27.5)  | 25.1-30.1 | 1(0.1)    | 0.0-0.6   | 217(17.5) | 15.5-19.7 | 681(54.9)  | 52.1-57.7 | <0.001 |

|                 |    |            |            |         |         |           |           |           |           |        |
|-----------------|----|------------|------------|---------|---------|-----------|-----------|-----------|-----------|--------|
| Togo<br>2013    | Q2 | 332(38.3)  | 35.2-41.6  | 2(0.2)  | 0.1-0.9 | 198(22.9) | 20.2-25.8 | 334(38.6) | 35.4-41.9 |        |
|                 | Q3 | 457(55.2)  | 51.8-58.6  | 1(0.1)  | 0.0-0.9 | 198(23.9) | 21.1-26.9 | 172(20.8) | 18.1-23.7 |        |
|                 | Q4 | 590(88.2)  | 55.5-90.4  | 3(0.5)  | 0.1-1.4 | 46(6.9)   | 5.2-9.1   | 30(4.5)   | 3.2-6.3   |        |
|                 | Q5 | 609(95.1)  | 93.0-96.4  | 5(0.8)  | 0.3-1.9 | 15(2.3)   | 1.4-3.8   | 12(1.9)   | 1.1-3.3   |        |
| Tunisia<br>2011 | Q1 | 276(91.4)  | 87.6-94.1  | 0(0.0)  | 0.0-1.2 | 0(0.0)    | 0.0-1.2   | 26(8.6)   | 5.9-12.4  | <0.001 |
|                 | Q2 | 248(99.2)  | 96.8-99.8  | 1(0.4)  | 0.1-2.8 | 0(0.0)    | 0.0-1.5   | 1(0.4)    | 0.1-2.8   |        |
|                 | Q3 | 195(99.5)  | 96.4-99.9  | 1(0.5)  | 0.1-3.6 | 0(0.0)    | 0.0-1.9   | 0(0.0)    | 0.0-1.9   |        |
|                 | Q4 | 233(99.6)  | 97.0-99.9  | 0(0.0)  | 0.0-1.6 | 0(0.0)    | 0.0-1.6   | 1(0.4)    | 0.1-3.0   |        |
|                 | Q5 | 152(99.4)  | 95.5-99.9  | 0(0.0)  | 0.0-2.4 | 0(0.0)    | 0.0-2.4   | 1(0.7)    | 0.1-4.5   |        |
| Uganda<br>2011  | Q1 | 464(38.2)  | 35.5-41.0  | 26(2.1) | 1.5-3.1 | 14(1.2)   | 0.7-1.9   | 711(58.5) | 55.7-61.3 | <0.001 |
|                 | Q2 | 499(53.4)  | 50.2-56.6  | 12(1.3) | 0.7-2.2 | 13(1.4)   | 0.8-2.4   | 411(44.0) | 40.8-47.2 |        |
|                 | Q3 | 493(57.6)  | 54.3-60.9  | 12(1.4) | 0.8-2.5 | 16(1.9)   | 1.4-3.0   | 335(39.1) | 35.9-42.5 |        |
|                 | Q4 | 471(62.3)  | 58.8-65.7  | 21(2.8) | 1.8-4.2 | 11(1.5)   | 0.8-2.6   | 253(33.5) | 30.2-36.9 |        |
|                 | Q5 | 894(89.5)  | 87.4-91.2  | 13(1.3) | 0.8-2.2 | 9(0.9)    | 0.5-1.7   | 83(8.3)   | 6.7-10.2  |        |
| Ukraine<br>2012 | Q1 | 324(98.8)  | 96.8-99.5  | 2(0.6)  | 0.2-2.4 | 0(0.0)    | 0.0-1.1   | 2(0.6)    | 0.2-2.4   | 0.05   |
|                 | Q2 | 369(97.9)  | 95.8-98.9  | 0(0.0)  | 0.0-1.0 | 0(0.0)    | 0.0-1.0   | 8(2.1)    | 1.1-4.2   |        |
|                 | Q3 | 249(99.2)  | 96.9-99.8  | 0(0.0)  | 0.0-1.5 | 0(0.0)    | 0.0-1.5   | 2(0.8)    | 0.2-3.1   |        |
|                 | Q4 | 300(100.0) | 98.8-100.0 | 0(0.0)  | 0.0-1.2 | 0(0.0)    | 0.0-1.2   | 0(0.0)    | 0.0-1.2   |        |
|                 | Q5 | 304(98.7)  | 96.6-99.5  | 2(0.7)  | 0.2-2.6 | 0(0.0)    | 0.0-1.2   | 2(0.7)    | 0.2-2.6   |        |
| Vietnam<br>2010 | Q1 | 200(61.2)  | 55.8-66.3  | 7(2.1)  | 1.0-4.4 | 3(0.9)    | 0.3-2.8   | 117(35.8) | 30.8-41.1 | <0.001 |
|                 | Q2 | 210(94.2)  | 90.2-96.6  | 3(1.4)  | 0.4-4.1 | 2(0.9)    | 0.2-3.5   | 8(3.6)    | 1.8-7.0   |        |
|                 | Q3 | 237(98.8)  | 96.2-99.6  | 1(0.4)  | 0.1-2.9 | 0(0.0)    | 0.0-1.5   | 2(0.8)    | 1.2-3.3   |        |
|                 | Q4 | 263(98.1)  | 95.6-99.2  | 3(1.1)  | 0.4-3.4 | 0(0.0)    | 0.0-1.4   | 2(0.8)    | 0.2-2.9   |        |
|                 | Q5 | 304(99.7)  | 97.7-100.0 | 0(0.0)  | 0.0-1.2 | 0(0.0)    | 0.0-1.2   | 1(0.3)    | 0.0-2.3   |        |
| Zambia<br>2007  | Q1 | 237(27.6)  | 24.7-30.6  | 1(0.1)  | 0.0-0.8 | 15(1.7)   | 1.1-2.9   | 607(70.6) | 67.4-73.5 | <0.001 |
|                 | Q2 | 237(27.5)  | 24.6-30.6  | 6(0.7)  | 0.3-1.5 | 20(2.3)   | 1.5-3.6   | 599(69.5) | 66.3-72.5 |        |
|                 | Q3 | 355(39.2)  | 36.1-42.5  | 1(0.1)  | 0.0-0.8 | 20(2.2)   | 1.4-3.4   | 529(58.5) | 55.2-61.6 |        |

|                  |    |           |           |         |         |         |         |           |           |        |
|------------------|----|-----------|-----------|---------|---------|---------|---------|-----------|-----------|--------|
|                  | Q4 | 611(71.3) | 68.2-94.2 | 2(0.2)  | 0.1-0.9 | 11(1.3) | 0.7-2.4 | 233(27.2) | 24.3-30.3 |        |
|                  | Q5 | 450(90.0) | 87.0-92.3 | 5(1.0)  | 0.4-2.4 | 5(1.0)  | 0.4-2.4 | 40(8.0)   | 5.9-10.7  |        |
| Zimbabwe<br>2010 | Q1 | 385(45.0) | 41.7-48.3 | 17(2.0) | 1.2-3.2 | 7(0.8)  | 0.4-1.7 | 447(52.2) | 48.9-55.6 | <0.001 |
|                  | Q2 | 396(54.0) | 50.0-57.2 | 14(1.9) | 1.1-3.2 | 5(0.7)  | 0.3-1.6 | 324(43.8) | 40.3-47.5 |        |
|                  | Q3 | 410(61.8) | 58.1-65.5 | 13(2.0) | 1.1-3.3 | 5(0.8)  | 0.3-1.8 | 235(35.4) | 31.9-39.2 |        |
|                  | Q4 | 622(78.7) | 75.7-81.5 | 17(2.2) | 1.3-3.4 | 5(0.6)  | 0.3-1.5 | 146(18.5) | 15.9-31.3 |        |
|                  | Q5 | 496(89.7) | 86.9-92.0 | 5(0.9)  | 0.4-2.2 | 1(0.2)  | 0.0-1.3 | 51(9.2)   | 7.1-11.9  |        |

p: Chi-square test of heterogeneity; Q1: 20% poorest; Q5: 20% richest; CAR: Central African Republic; SBA: Skilled birth attendant

Web Figure 3a: Combination of place of delivery and type of professional, by urban/rural residence, by country.

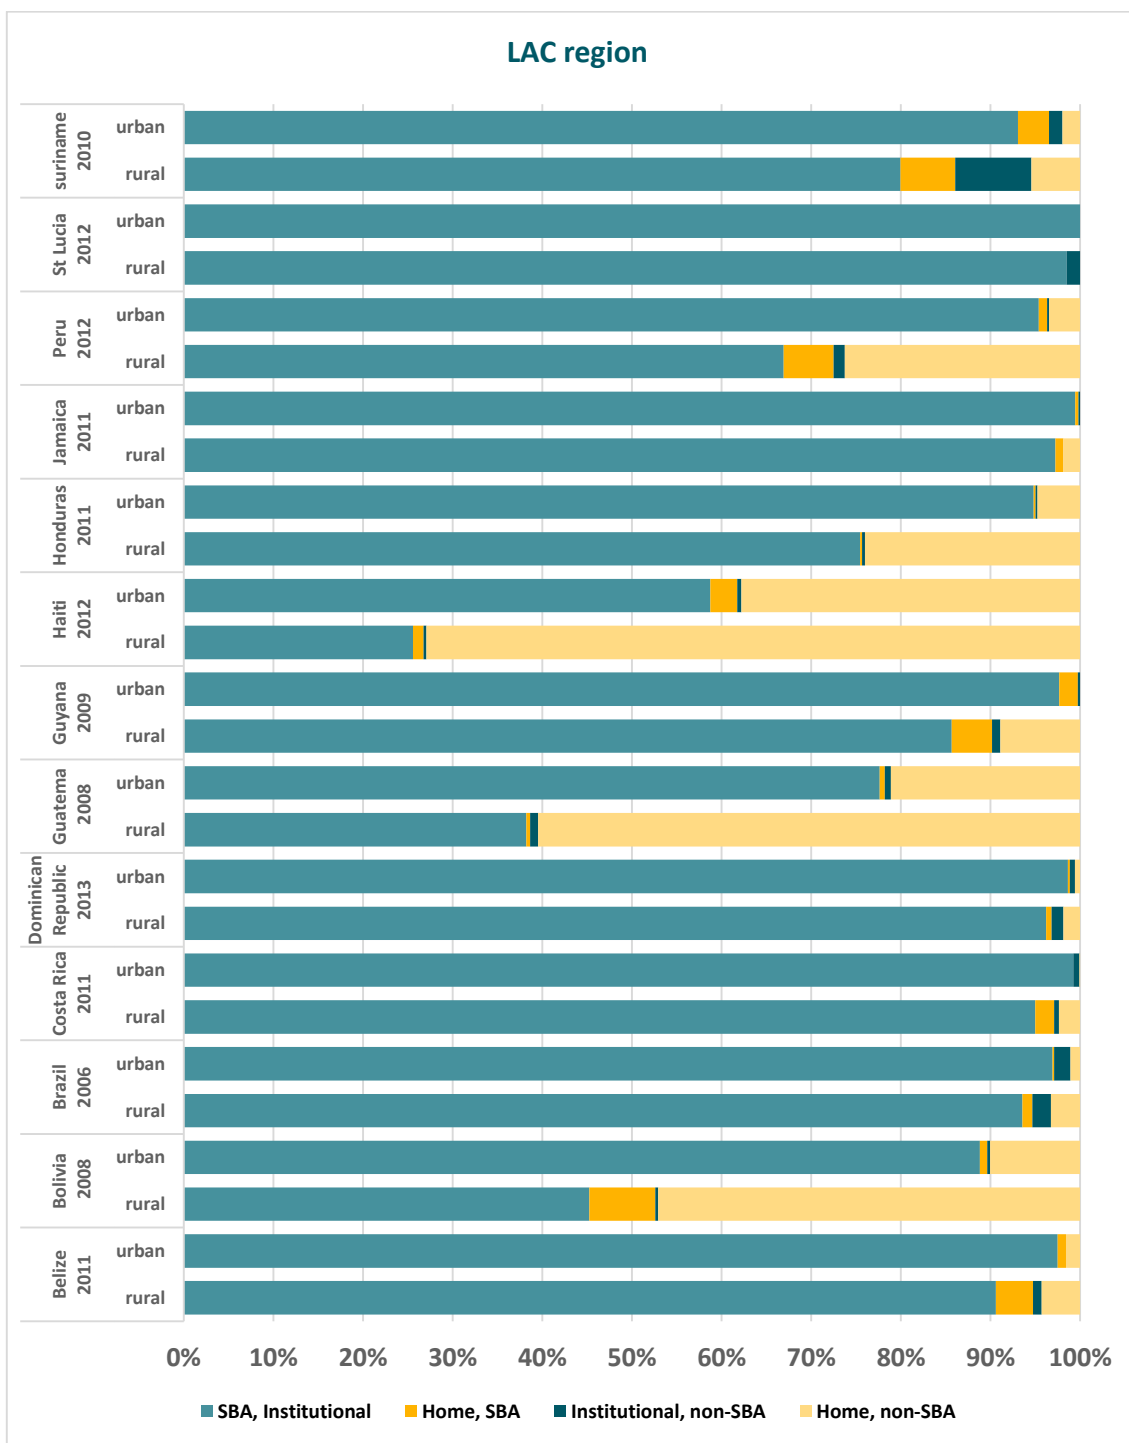



Web Figure 3b: Combination of place of delivery and type of professional, by urban/rural residence, by country.

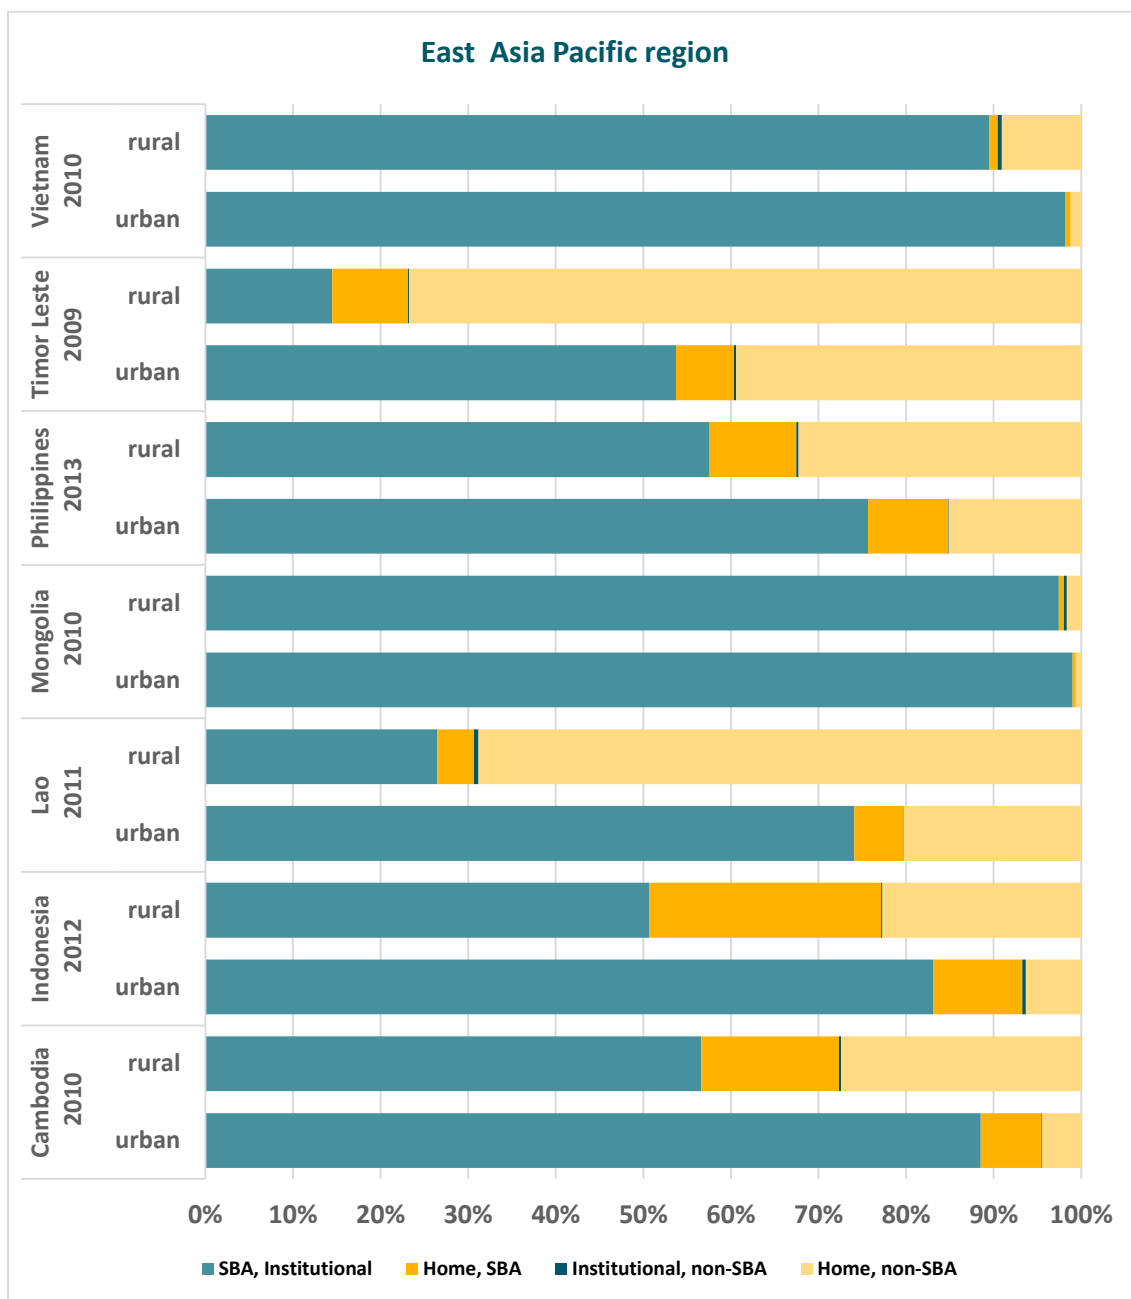

Web Figure 3c: Combination of place of delivery and type of professional, by urban/rural residence, by country.

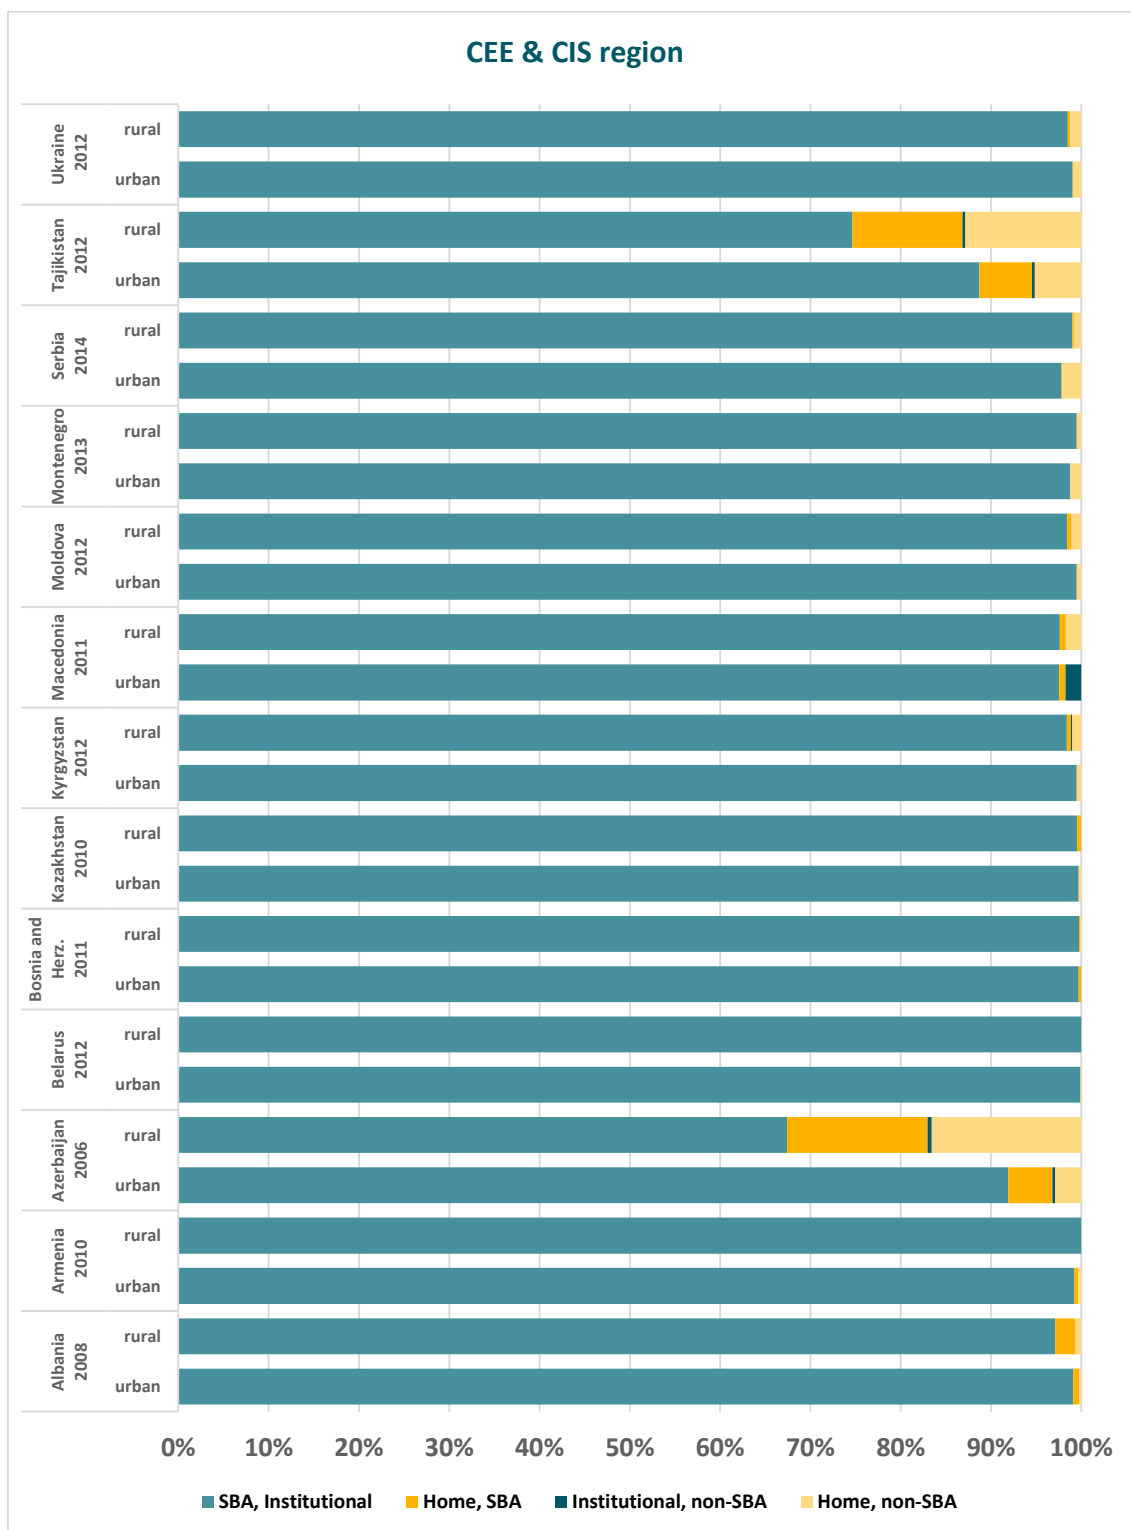

Web Figure 3d: Combination of place of delivery and type of professional, by urban/rural residence, by country.

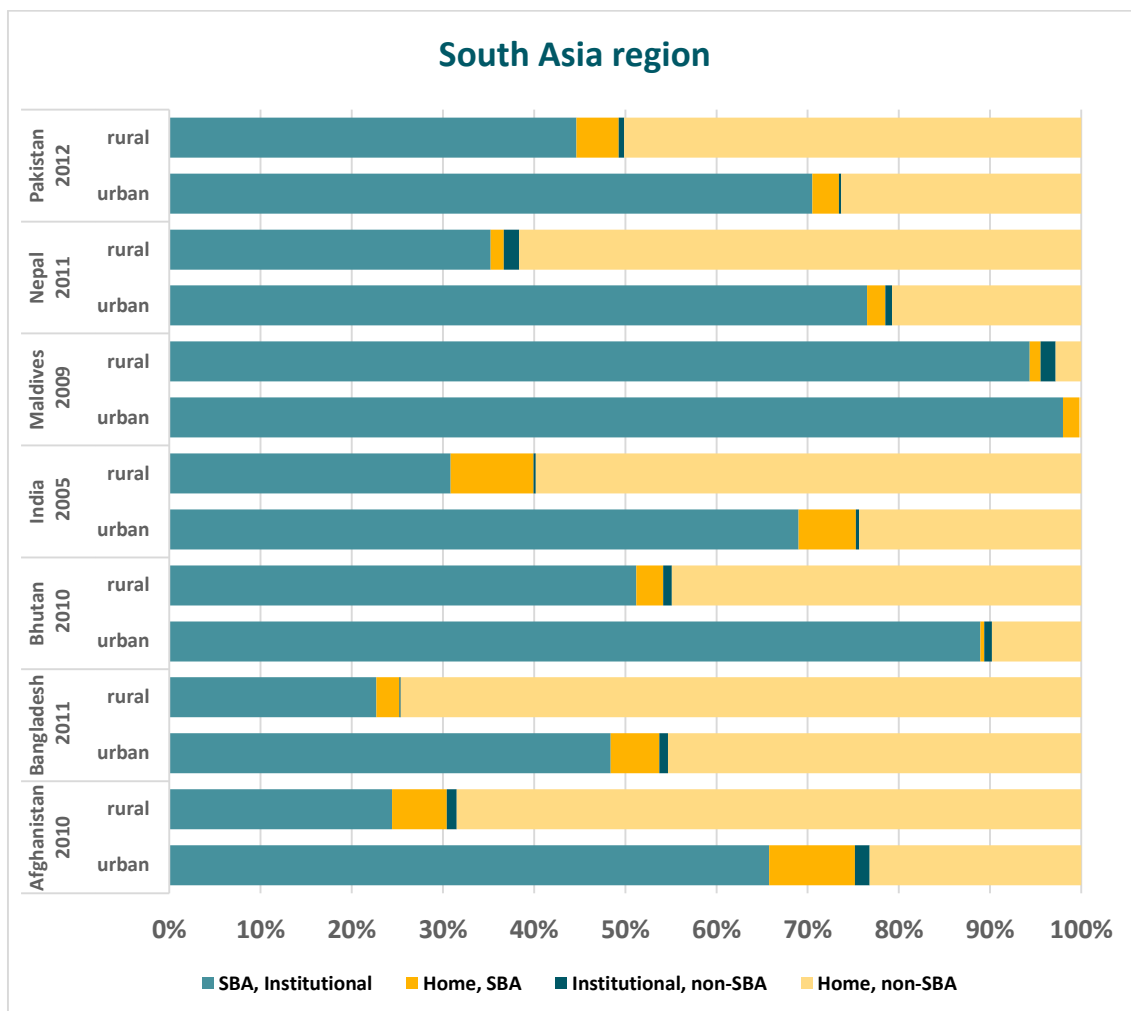

Web Figure 3e: Combination of place of delivery and type of professional, by urban/rural residence, by country.

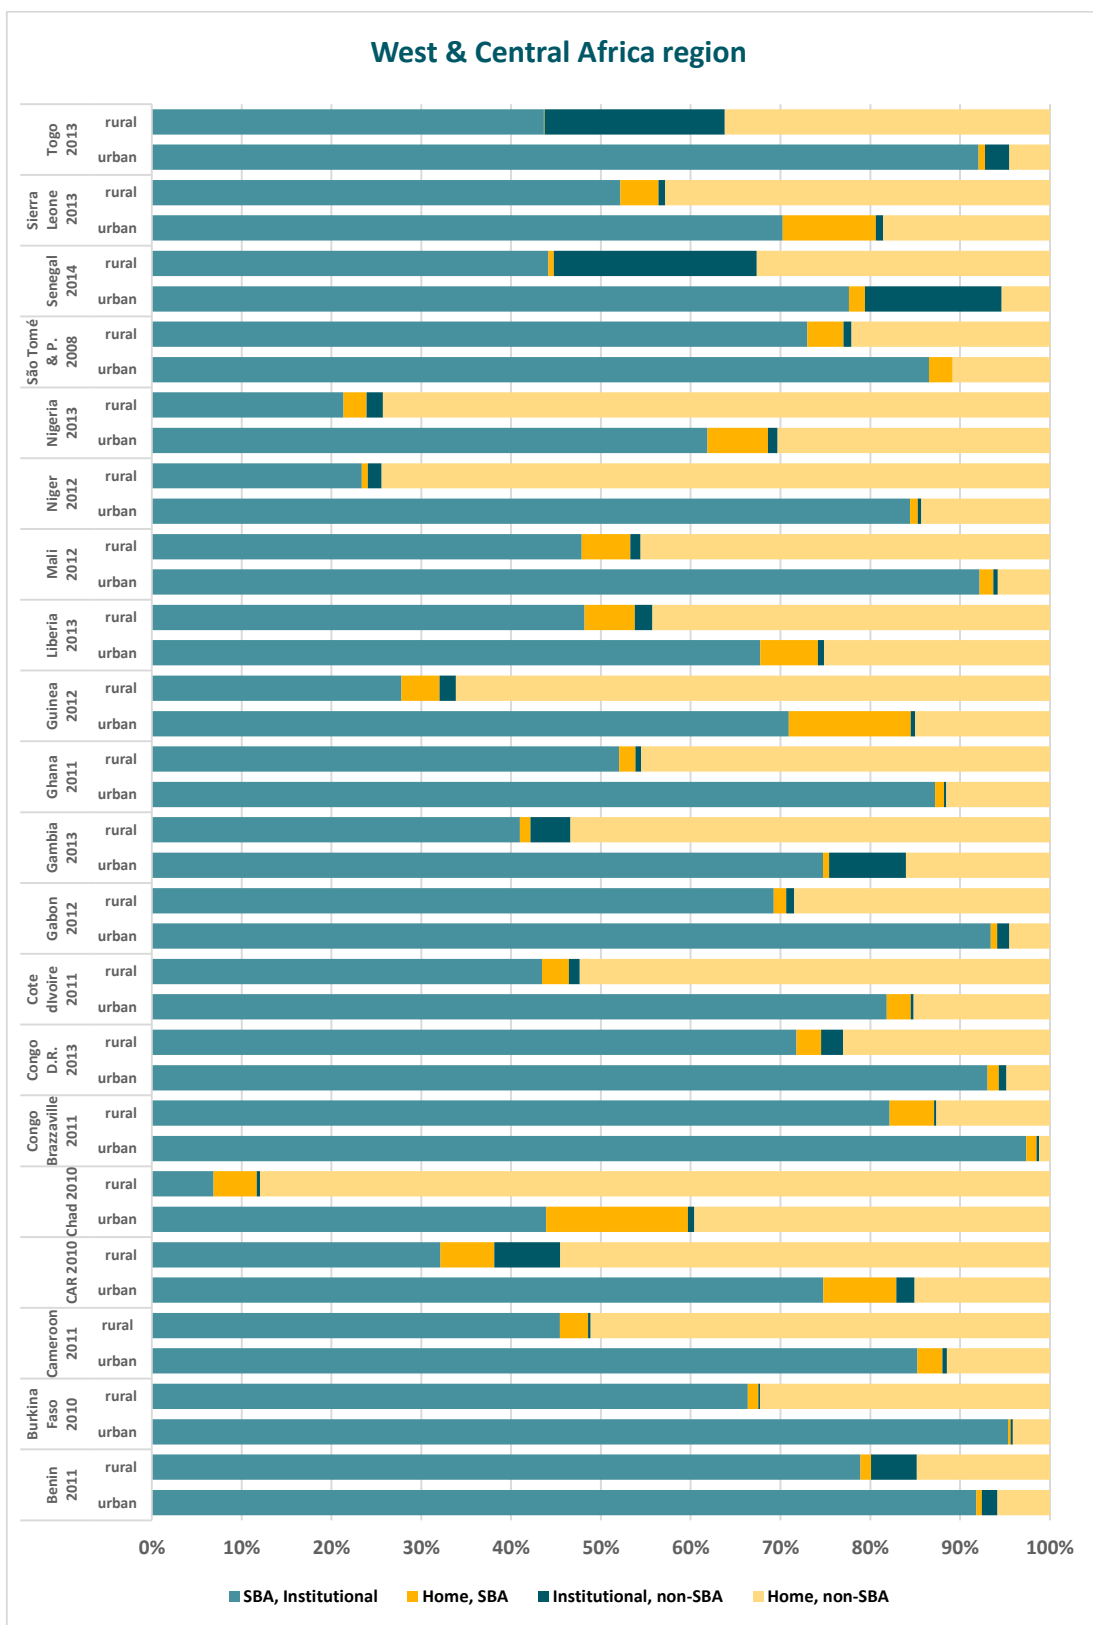

Web Figure 3f: Combination of place of delivery and type of professional, by urban/rural residence, by country.

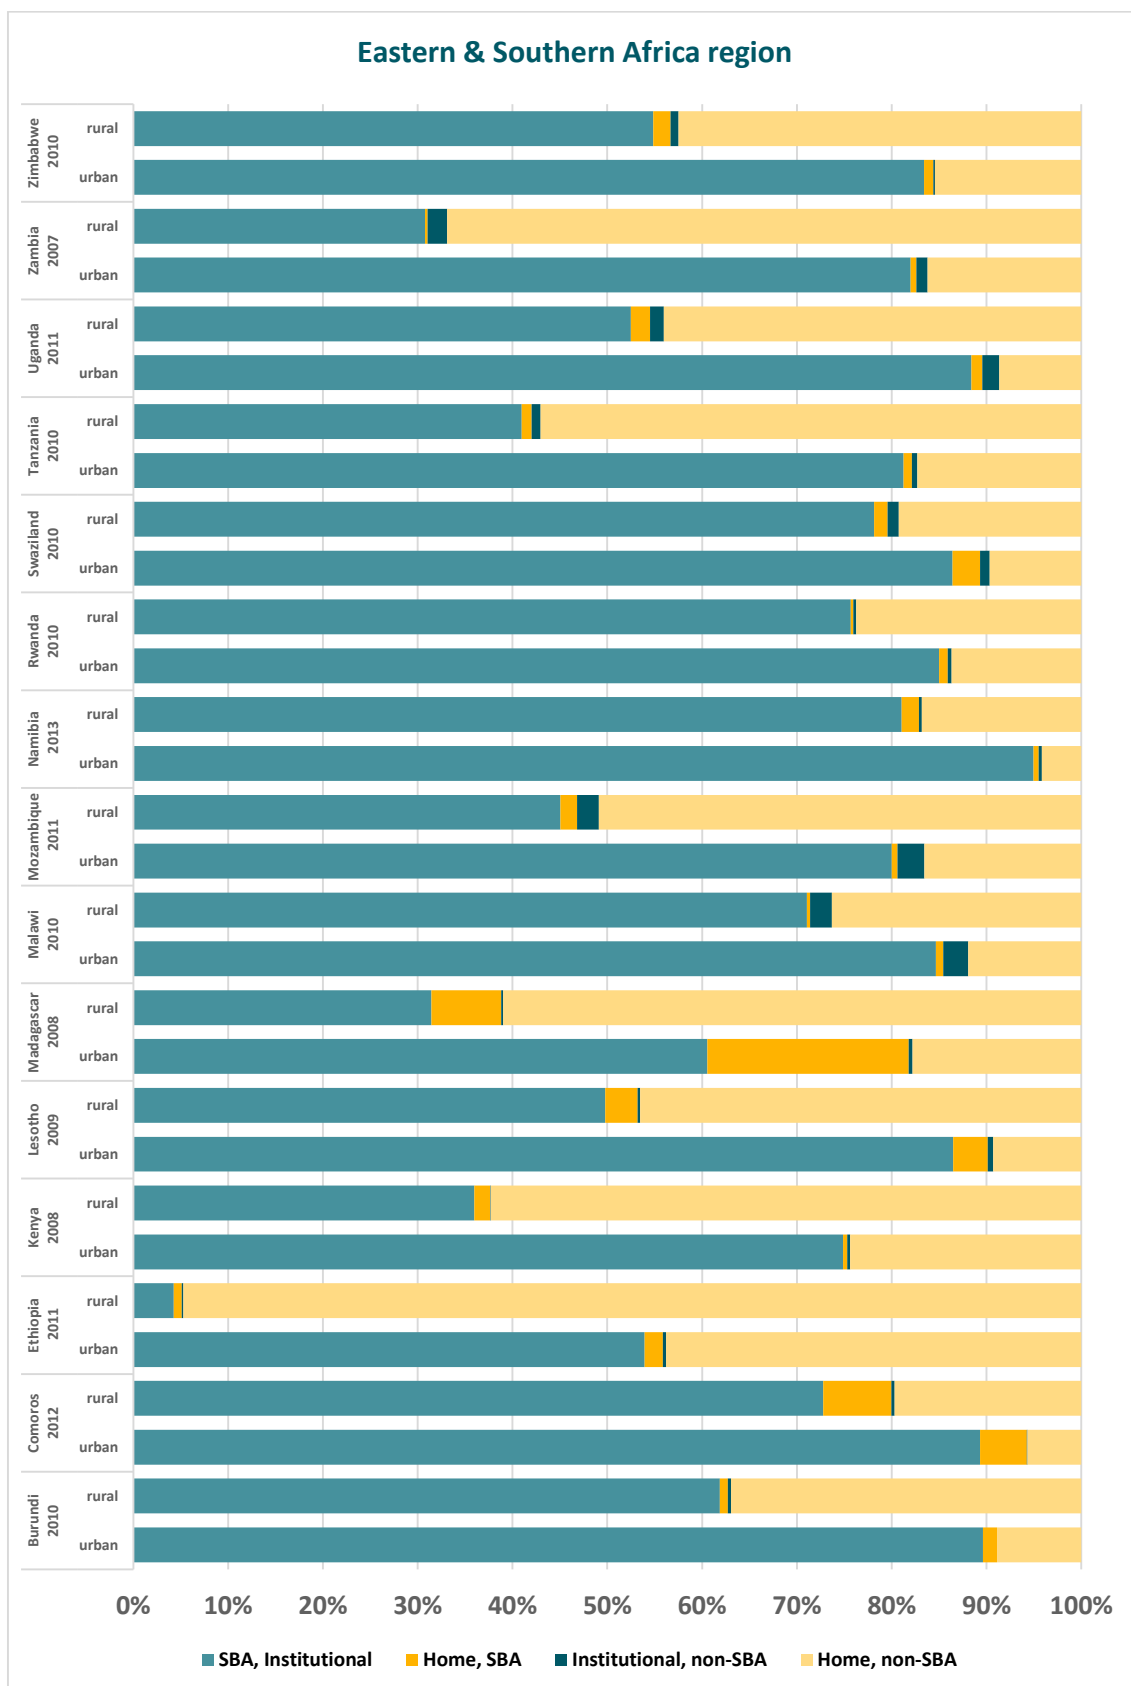

Web Figure 3g: Combination of place of delivery and type of professional, by urban/rural residence, by country.

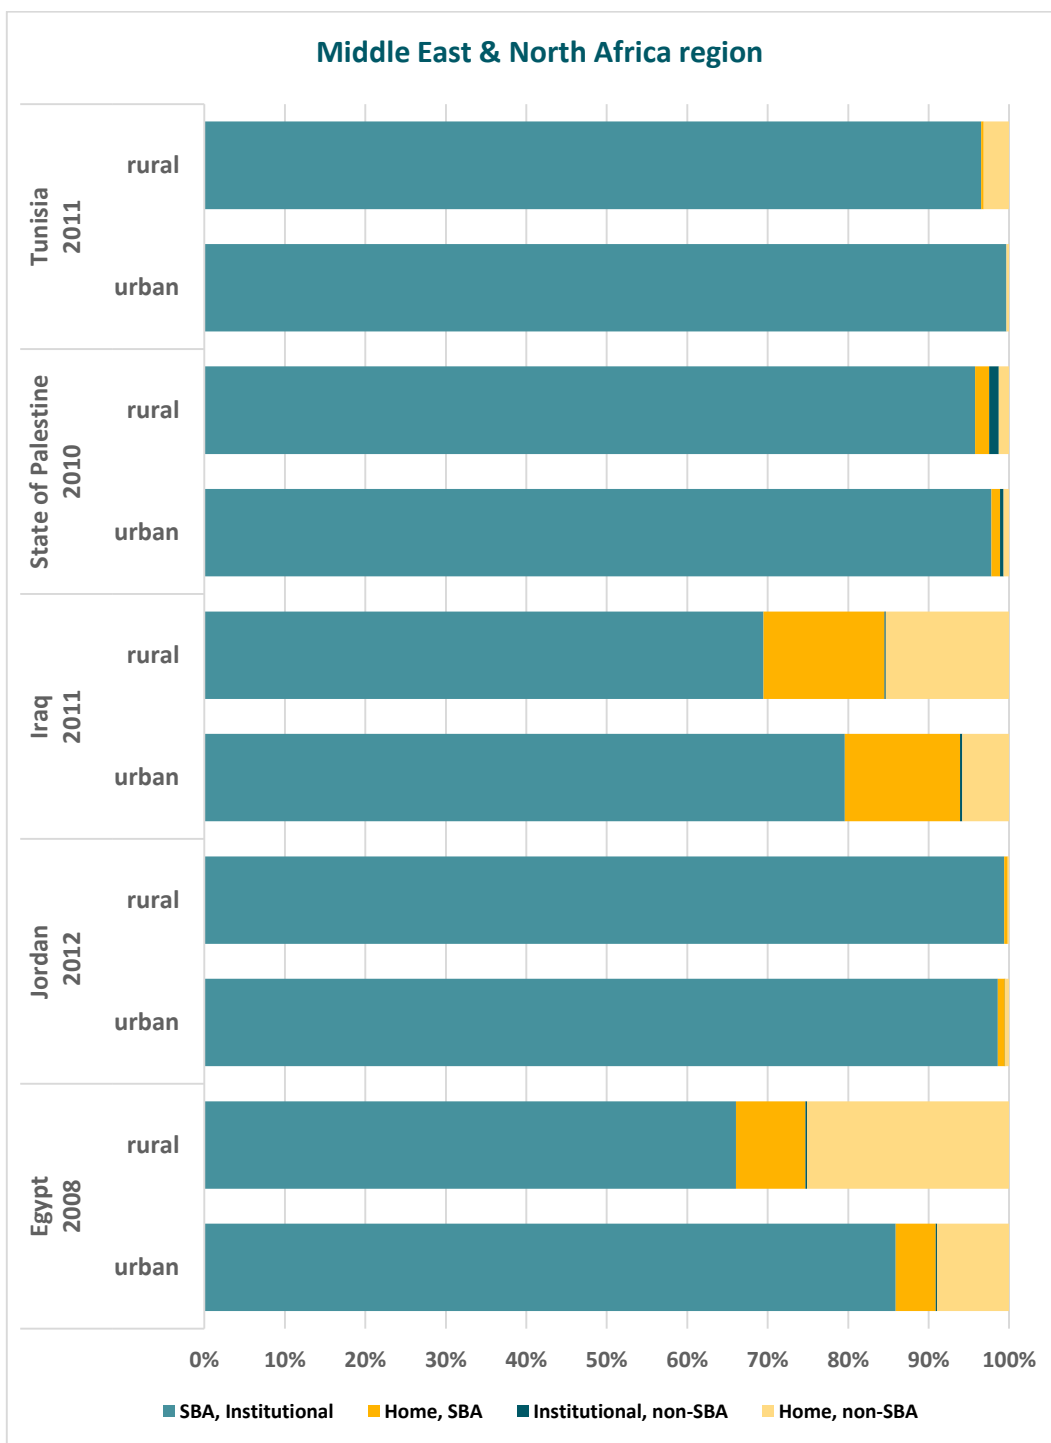

Web Figure 4a: Combination of place of delivery and type of professional, by wealth quintile, by country.

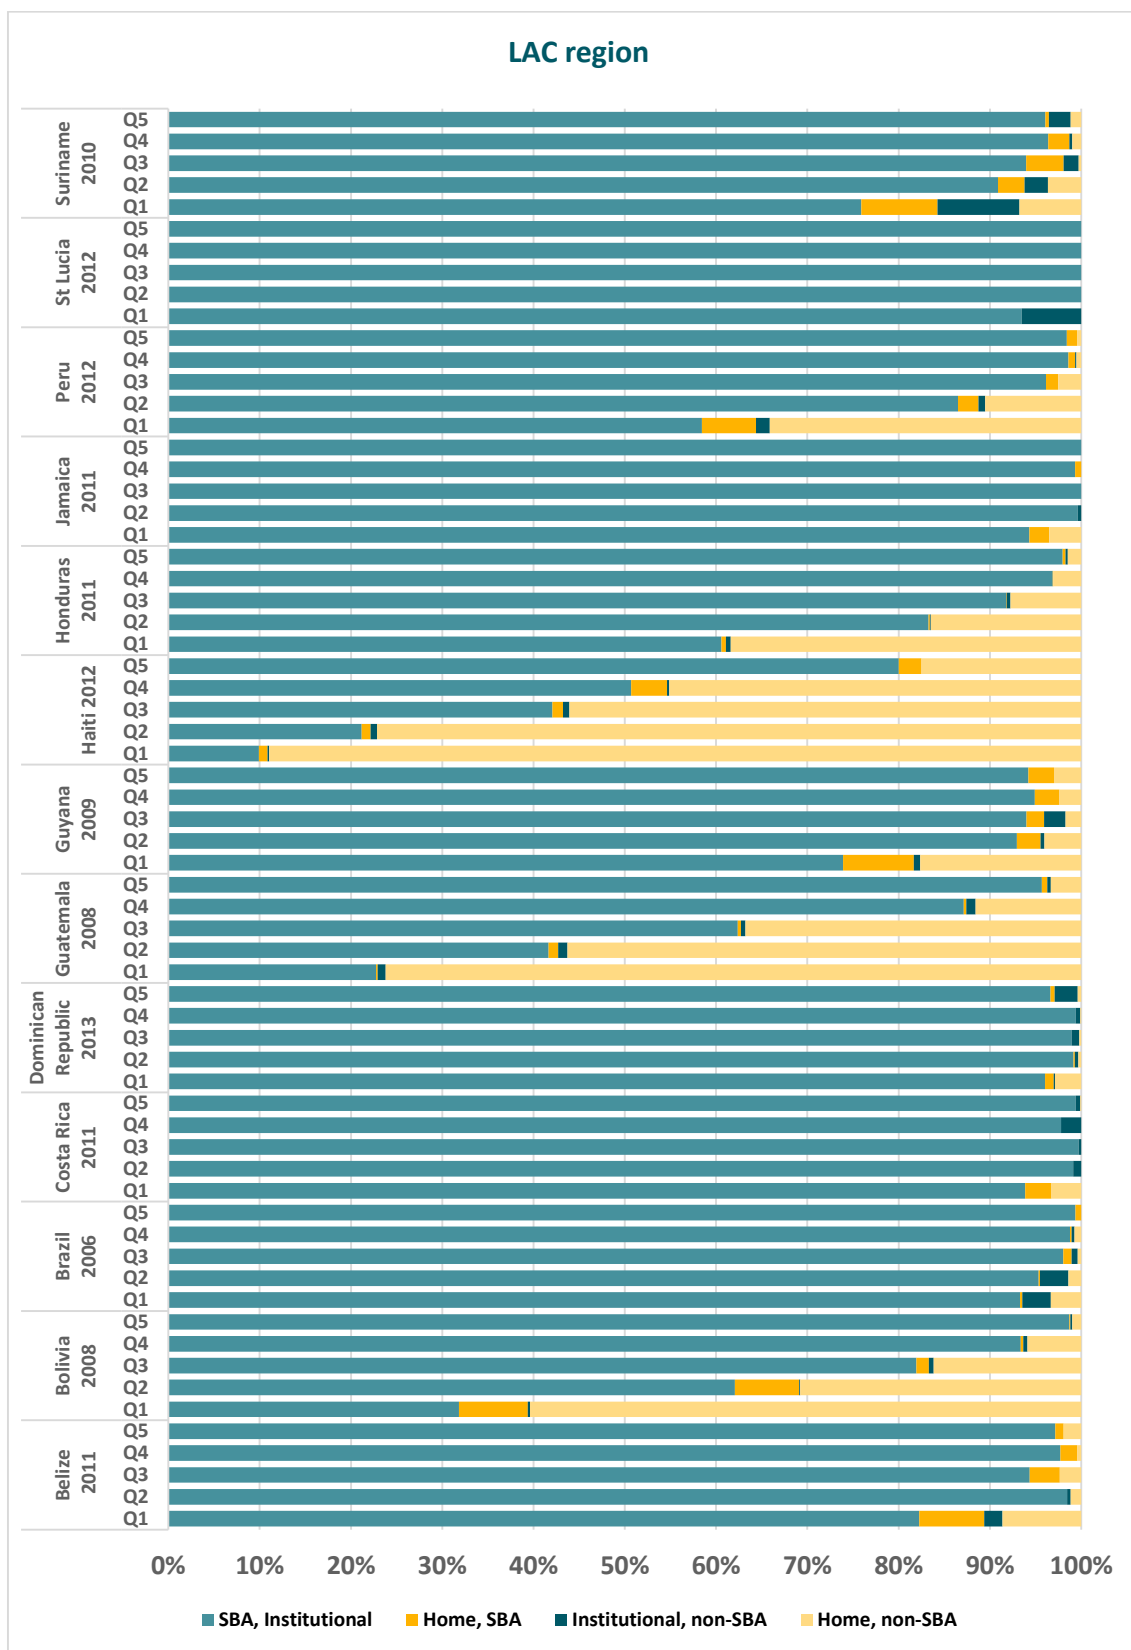

Web Figure 4b: Combination of place of delivery and type of professional, by wealth quintile, by country.

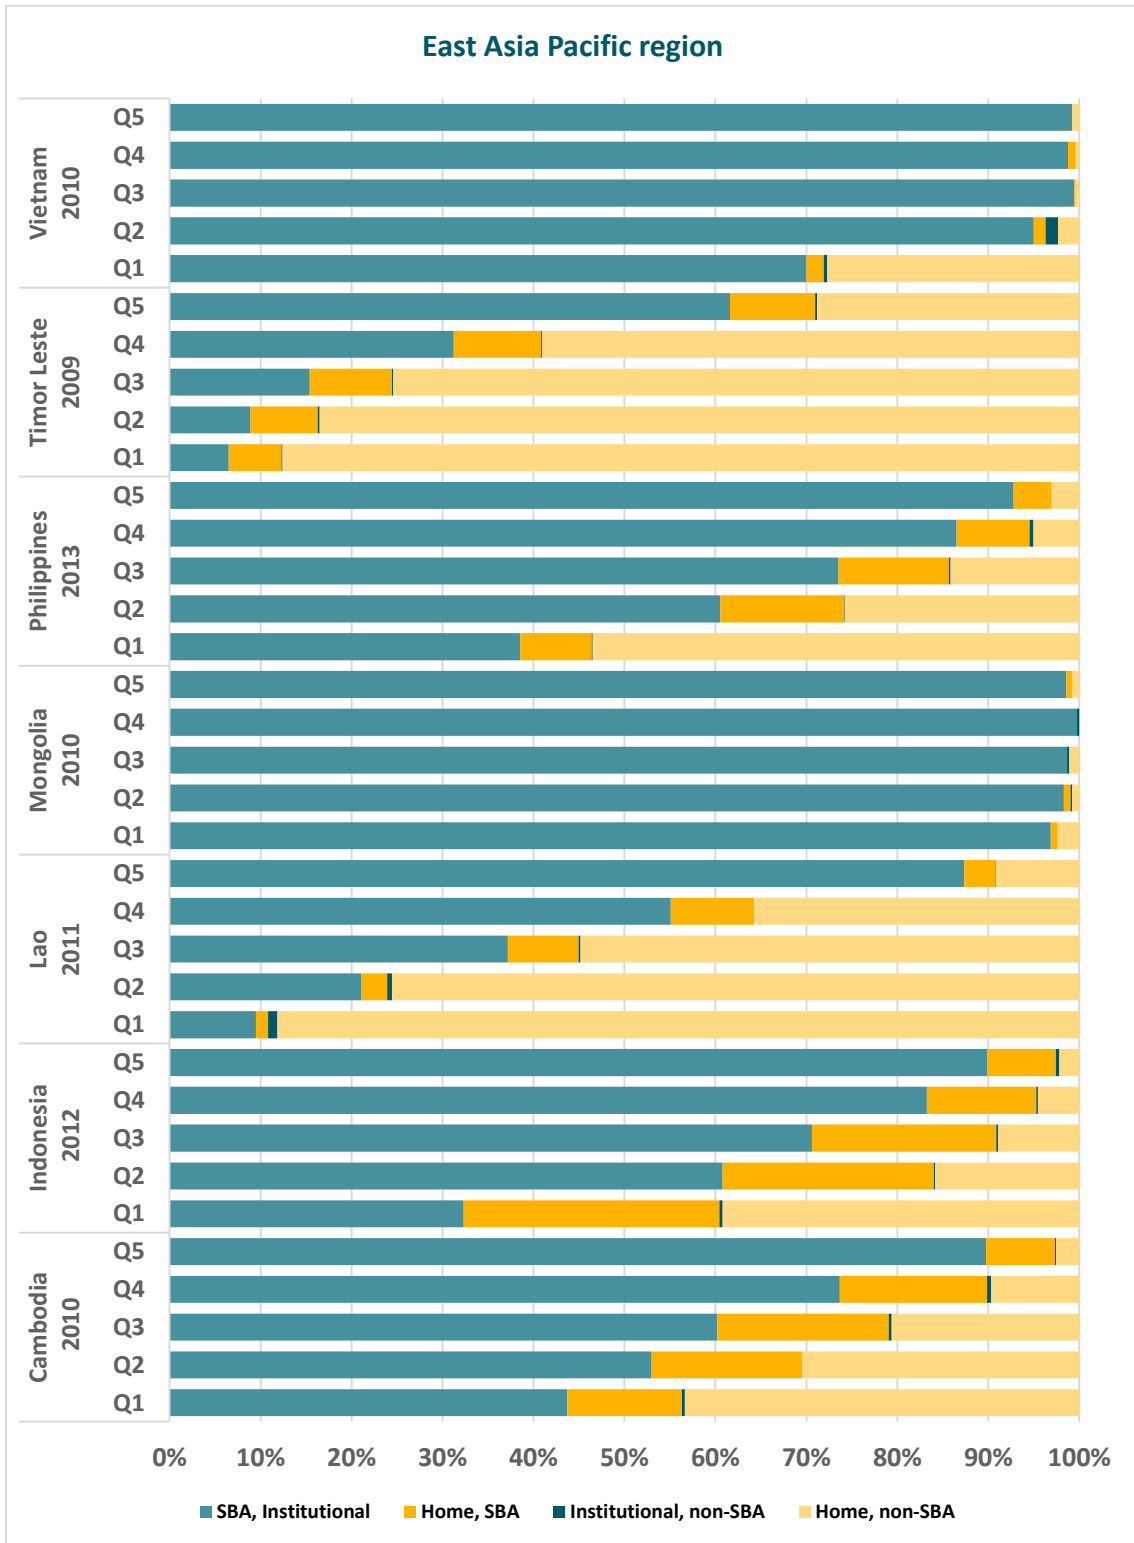



Web Figure 4c: Combination of place of delivery and type of professional, by wealth quintile, by country.

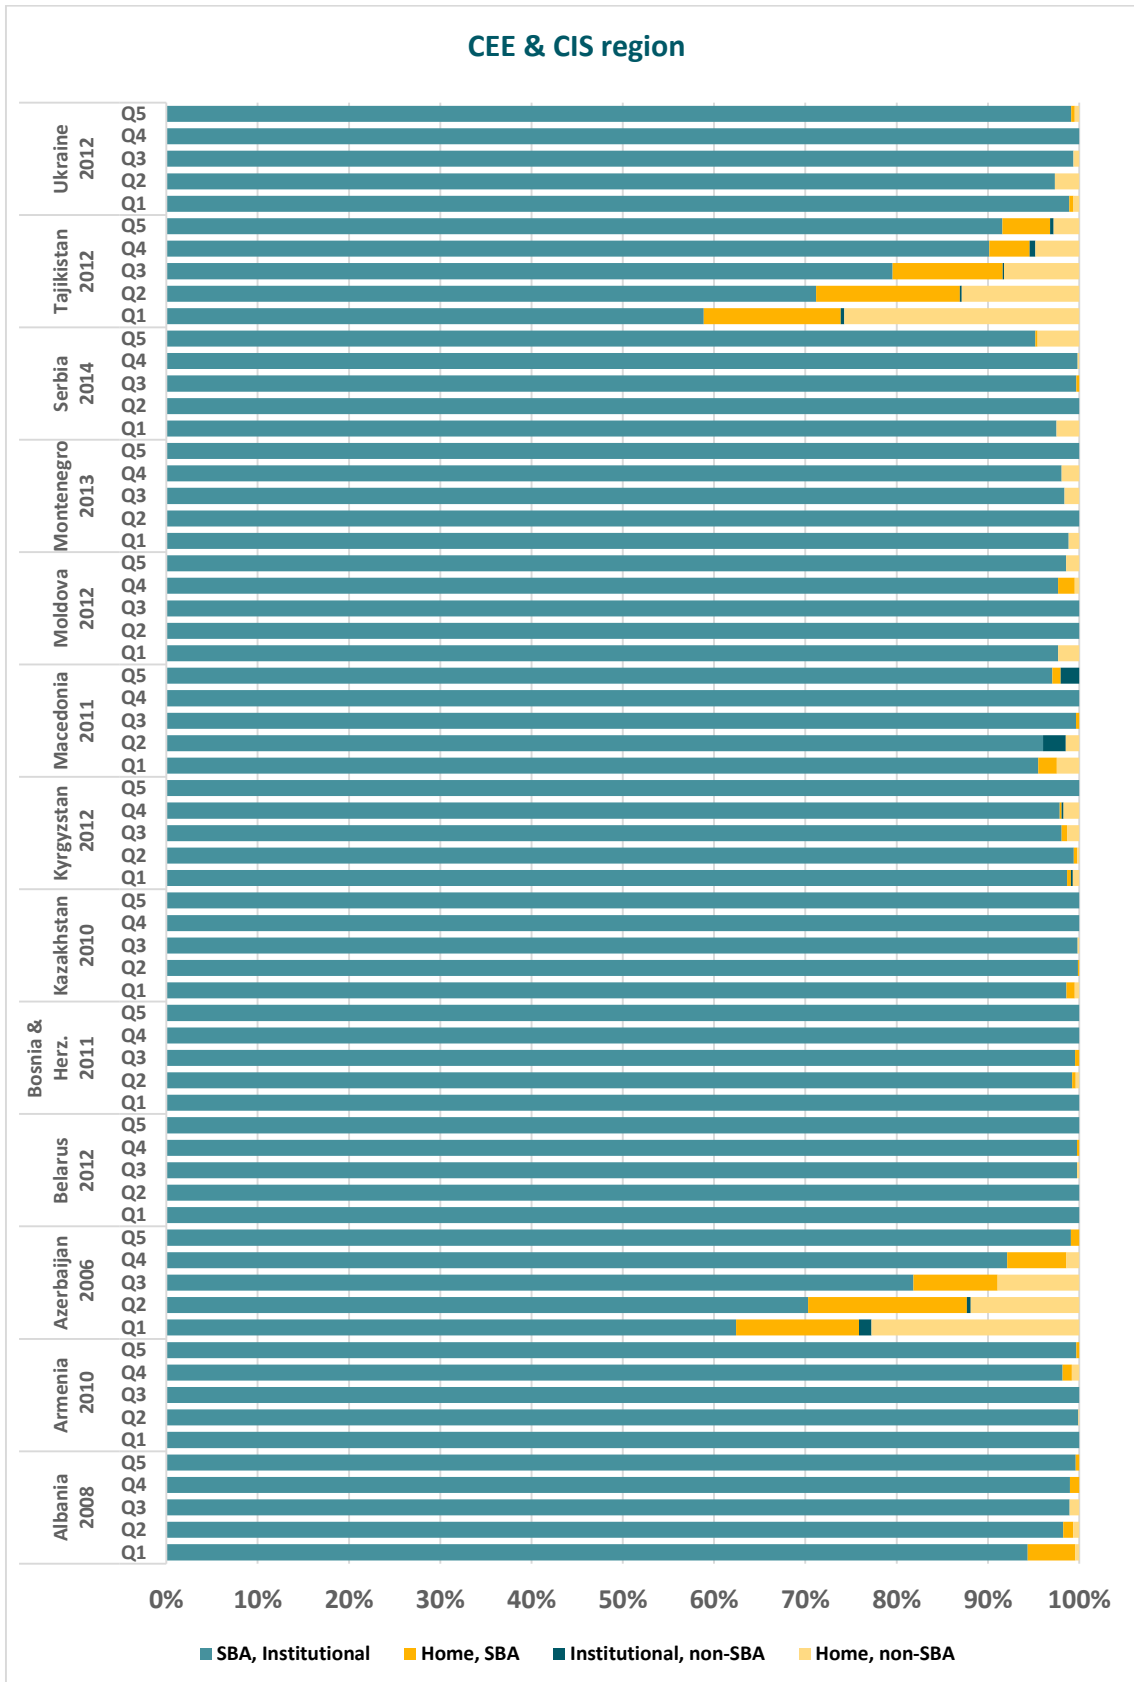

Web Figure 4d: Combination of place of delivery and type of professional, by wealth quintile, by country.

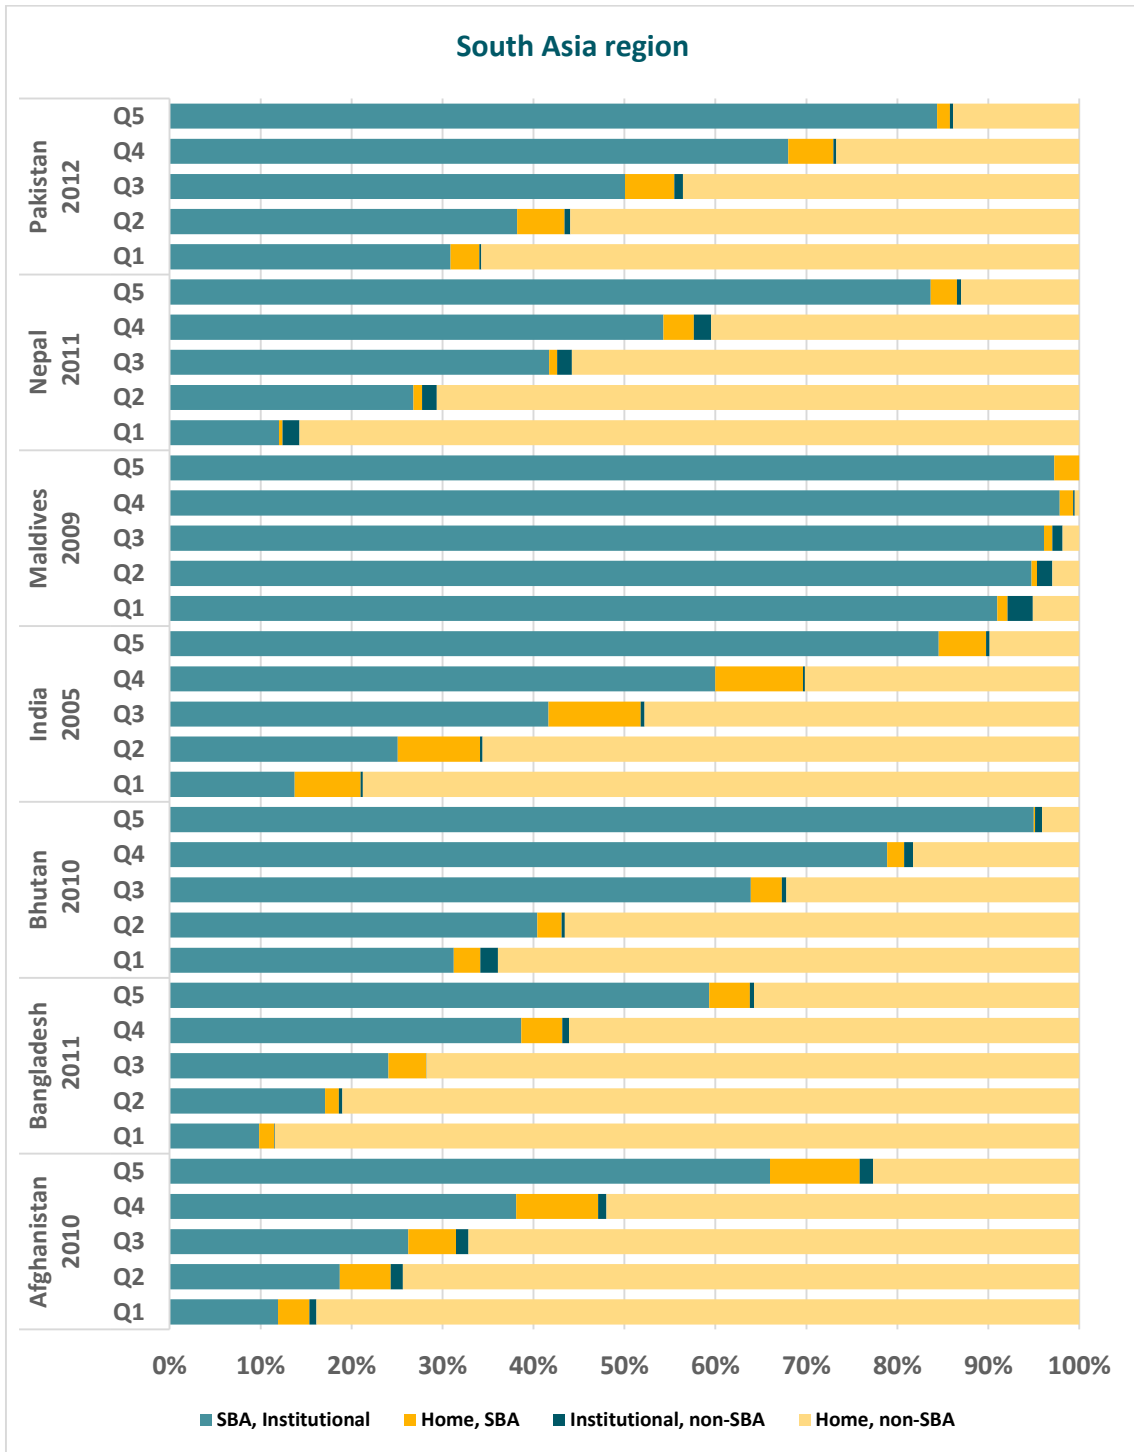

Web Figure 4e: Combination of place of delivery and type of professional, by wealth quintile, by country.

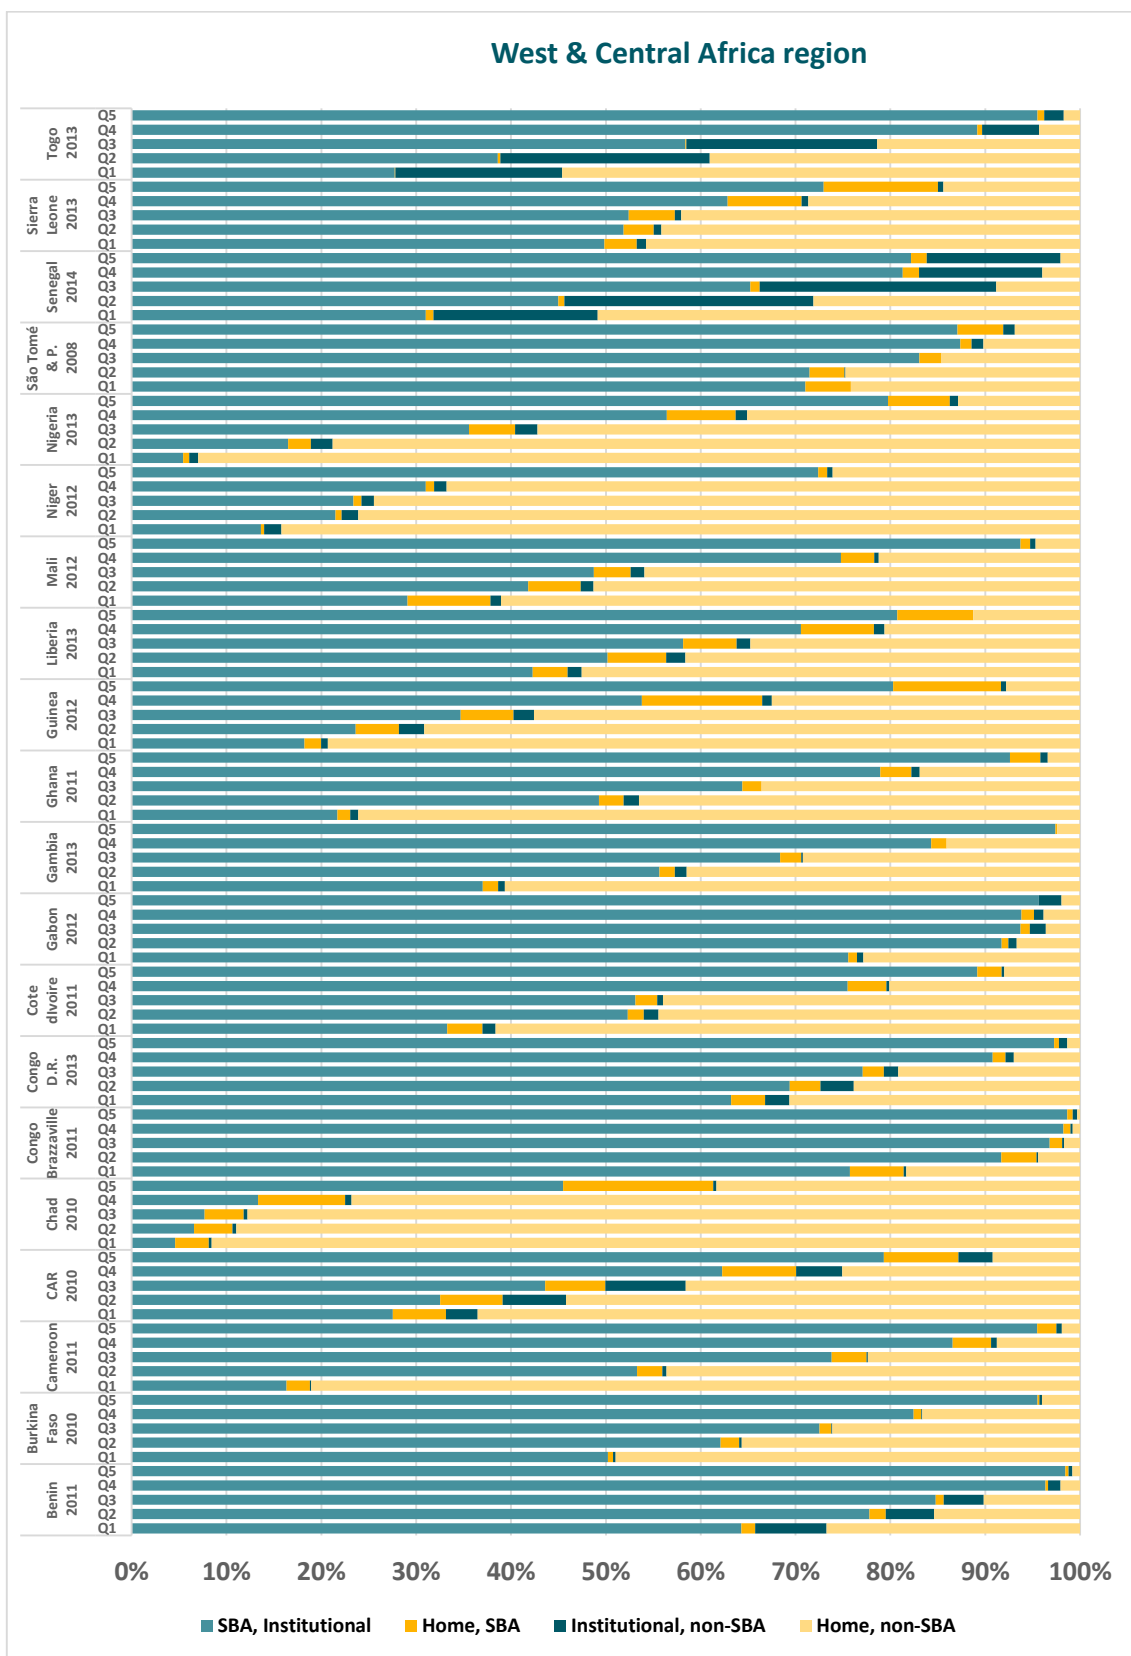

Web Figure 4f: Combination of place of delivery and type of professional, by wealth quintile, by country.

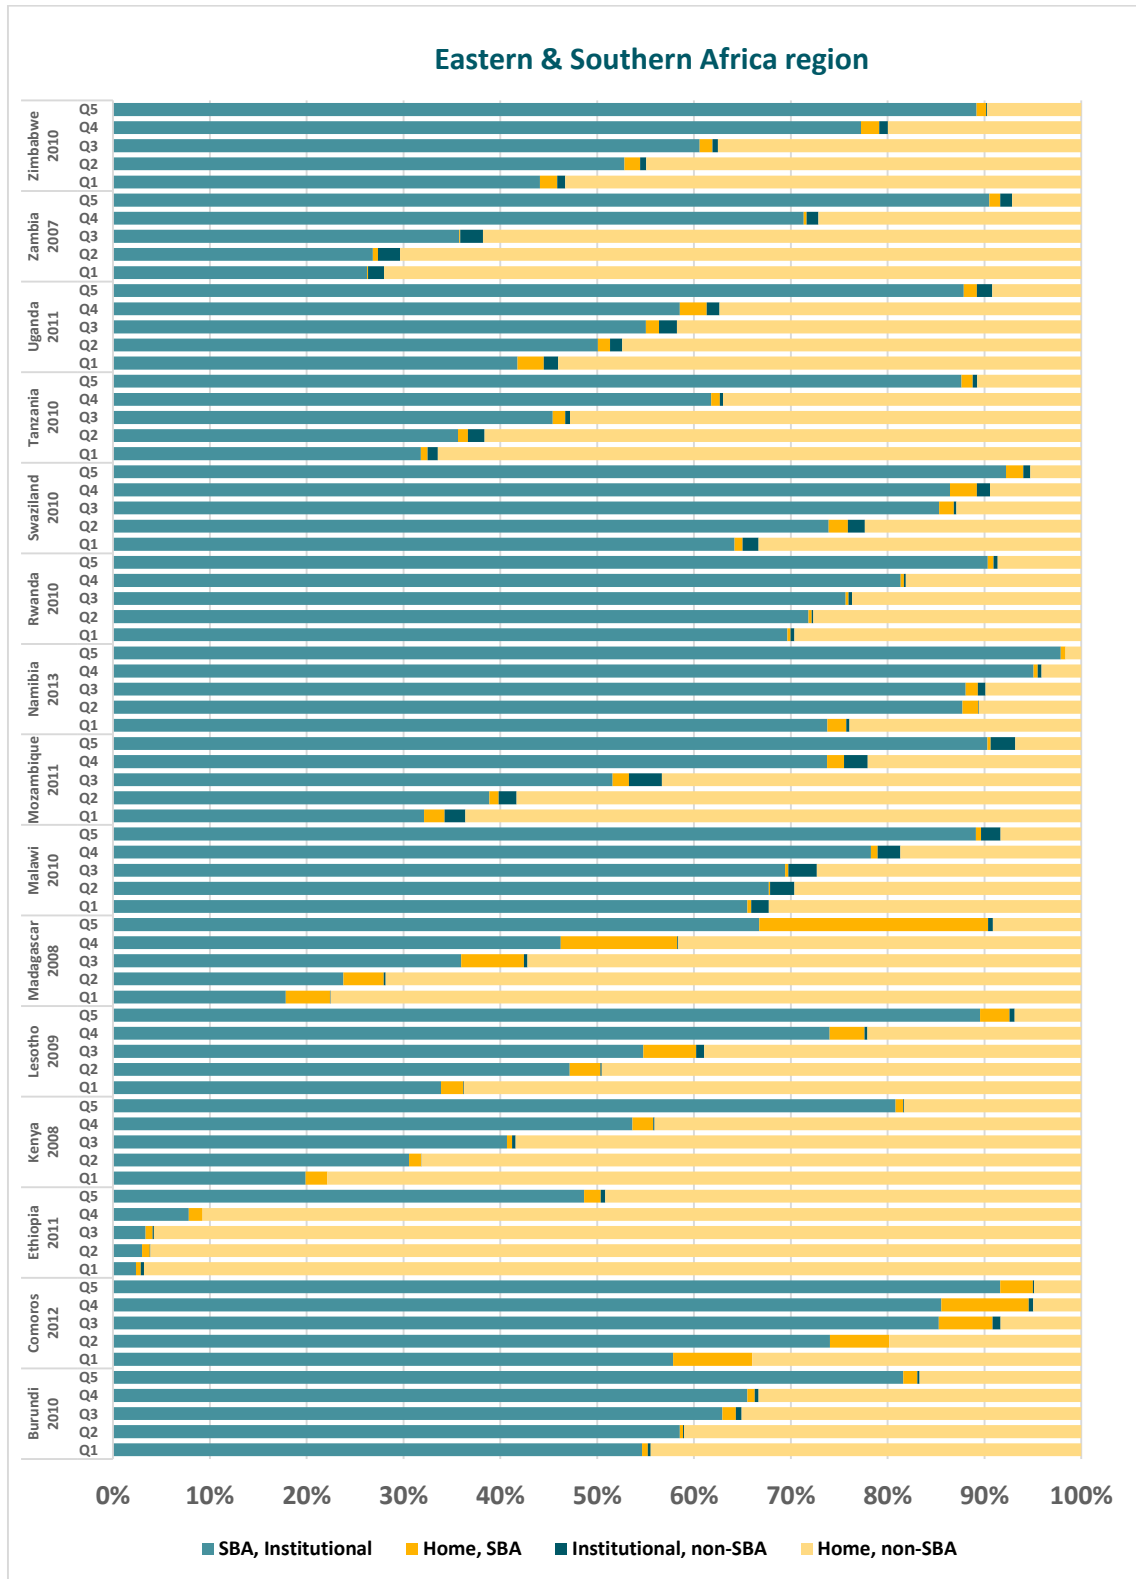

Web Figure 4g: Combination of place of delivery and type of professional, by wealth quintile, by country.

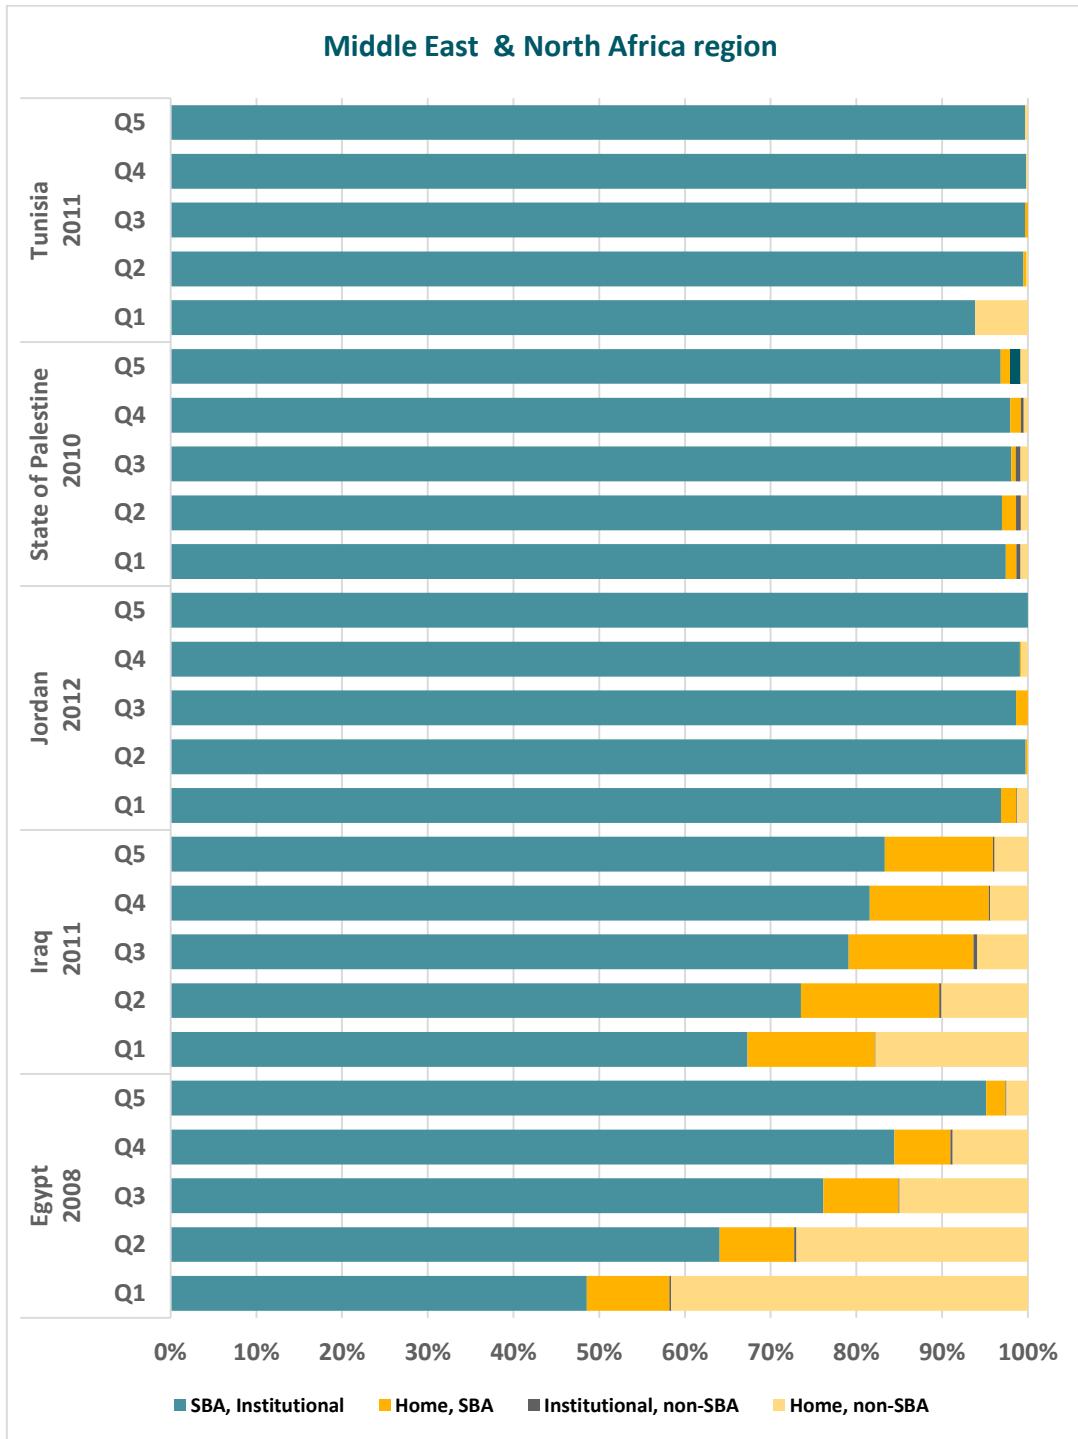

Supplement: MOESM2 [file 10272206]
