# Supplementary material for: Inequalities in the coverage of place of delivery and skilled birth attendance: analyses of cross-sectional surveys in 80 low and middle-income countries
Source: PubMed Central journal article supplement (PMC4912761; doi:10.1186/s12978-016-0192-2), 2016-06-17
Supplement: 12978_2016_192_MOESM5_ESM.pdf [file 12978_2016_192_MOESM5_ESM.pdf]

## 1 Appendix B: ISO codes

| ISO codes | Country                | ISO codes | Country                   | ISO codes | Country    | ISO codes | Country             |
|-----------|------------------------|-----------|---------------------------|-----------|------------|-----------|---------------------|
| AFG       | Afghanistan            | COD       | Congo Democratic Republic | KEN       | Kenya      | PHL       | Philippines         |
| ALB       | Albania                | CRI       | Costa Rica                | KGZ       | Kyrgyzstan | RWA       | Rwanda              |
| ARM       | Armenia                | CIV       | Cote d'Ivoire             | LAO       | Lao        | STP       | São Tomé & Príncipe |
| AZE       | Azerbaijan             | DOM       | Dominican Republic        | LSO       | Lesotho    | SEN       | Senegal             |
| BGD       | Bangladesh             | EGY       | Egypt                     | LBR       | Liberia    | SRB       | Serbia              |
| BLR       | Belarus                | ETH       | Ethiopia                  | MKD       | Macedonia  | SLE       | Sierra Leone        |
| BLZ       | Belize                 | GAB       | Gabon                     | MDG       | Madagascar | LCA       | St Lucia            |
| BEN       | Benin                  | GMB       | Gambia                    | MWI       | Malawi     | PSE       | State of Palestine  |
| BTN       | Bhutan                 | GHA       | Ghana                     | MDV       | Maldives   | SUR       | Suriname            |
| BOL       | Bolivia                | GTM       | Guatemala                 | MLI       | Mali       | SWZ       | Swaziland           |
| BIH       | Bosnia and Herzegovina | GIN       | Guinea                    | MDA       | Moldova    | TJK       | Tajikistan          |
| BRA       | Brazil                 | GUY       | Guyana                    | MNG       | Mongolia   | TZA       | Tanzania            |
| BFA       | Burkina Faso           | HTI       | Haiti                     | MNE       | Montenegro | TLS       | Timor Leste         |
| BDI       | Burundi                | HND       | Honduras                  | MOZ       | Mozambique | TGO       | Togo                |
| KHM       | Cambodia               | IND       | India                     | NAM       | Namibia    | TUN       | Tunisia             |
| CMR       | Cameroon               | IDN       | Indonesia                 | NEP       | Nepal      | UGA       | Uganda              |
| CAF       | CAR                    | IRQ       | Iraq                      | NER       | Niger      | UKR       | Ukraine             |
| TCD       | Chad                   | JAM       | Jamaica                   | NGA       | Nigeria    | VNM       | Vietnam             |
| COM       | Comoros                | JOR       | Jordan                    | PAK       | Pakistan   | ZMB       | Zambia              |
| 2 COG     | Congo Brazzaville      | KAZ       | Kazakhstan                | PER       | Peru       | ZWE       | Zimbabwe            |
