# Supplementary material for: Inequalities in the coverage of place of delivery and skilled birth attendance: analyses of cross-sectional surveys in 80 low and middle-income countries
Source: Reprod Health. 2016 Jun 17;13:77. doi: 10.1186/s12978-016-0192-2 (PMC4912761; doi:10.1186/s12978-016-0192-2)
Supplement: Additional file 6: — (XLSX 47 kb) [file 12978_2016_192_MOESM6_ESM.xlsx]

## Sheet: Plan1
Combination of skilled birth attendance (SBA) and institutional deliveries in low and middle-income countries in the most recent surveys (DHS, MICS), by country.
Country	Source	SBA, institutional	Home, SBA	Institutional, non-SBA	Home, non-SBA
Afghanistan 2010	MICS	0.320054	0.0661808	0.0117902	0.601975
Albania 2008	DHS	0.978886	0.0163747	0	0.0047392
Armenia 2010	DHS	0.995426	0.0026455	0	0.0019281
Azerbaijan 2006	DHS	0.79504	0.103032	0.00386	0.0980681
Bangladesh 2011	DHS	0.285015	0.0316124	0.0033667	0.680006
Belarus 2012	MICS	0.999049	0.0005126	0	0.0004388
Belize 2011	MICS	0.932401	0.0292184	0.0059056	0.0324745
Benin 2011	DHS	0.842106	0.0092923	0.0373392	0.111263
Bhutan 2010	MICS	0.622098	0.0220956	0.0091219	0.346685
Bolivia 2008	DHS	0.689483	0.0381211	0.0030859	0.26931
Bosnia and Herzegovina 2011	MICS	0.997303	0.0017977	0	0.0008989
Brazil 2006	DHS	0.962827	0.0037224	0.0185316	0.0149187
Burkina Faso 2010	DHS	0.713962	0.0100985	0.001954	0.273986
Burundi 2010	DHS	0.641484	0.0089608	0.003089	0.346466
Cambodia 2010	DHS	0.61512	0.143658	0.0024939	0.238728
Cameroon 2011	DHS	0.624066	0.0298935	0.003626	0.342414
CAR 2010	MICS	0.470669	0.0674754	0.0547295	0.407126
Chad 2010	MICS	0.153637	0.0734999	0.0043066	0.768556
Comoros 2012	DHS	0.77256	0.0656521	0.0026911	0.159097
Congo Brazzaville 2011	DHS	0.915776	0.0258977	0.0026757	0.0556509
Congo D.R. 2013	DHS	0.784558	0.0228132	0.0194638	0.173165
Costa Rica 2011	MICS	0.974796	0.0087823	0.0061905	0.010231
Cote dIvoire 2011	DHS	0.580887	0.0287651	0.0087616	0.381586
Dominican R. 2013	DHS	0.981123	0.0033316	0.0075637	0.009104
Egypt 2008	DHS	0.7354	0.072492	0.0019096	0.190199
Ethiopia 2011	DHS	0.108677	0.0097267	0.0018211	0.879775
Gabon 2012	DHS	0.896483	0.0081396	0.0126607	0.0827166
Gambia 2013	DHS	0.569056	0.0092471	0.0640956	0.357601
Ghana 2011	MICS	0.66896	0.0147414	0.0047148	0.311583
Guatemala 2008	DHS	0.530735	0.0047089	0.0082603	0.46116
Guinea 2012	DHS	0.395291	0.067734	0.0146869	0.522288
Guyana 2009	DHS	0.88208	0.0398726	0.0076401	0.0704074
Haiti 2012	DHS	0.376802	0.0183614	0.003791	0.601046
Honduras 2011	DHS	0.844462	0.0021934	0.0027232	0.150621
India 2005	DHS	0.404691	0.0837293	0.0029341	0.508645
Indonesia 2012	DHS	0.665444	0.185204	0.0025991	0.146753
Iraq 2011	MICS	0.763302	0.145406	0.0022394	0.089052
Jamaica 2011	MICS	0.98462	0.006145	0.0009411	0.0082935
Jordan 2012	DHS	0.987451	0.0078759	0.0001774	0.0044956
Kazakhstan 2010	MICS	0.996106	0.0024115	0	0.0014826
Kenya 2008	DHS	0.432985	0.0142808	0.0012312	0.551503
Kyrgyzstan 2012	DHS	0.98745	0.0032158	0.0009266	0.0084076
Lao 2011	MICS	0.370654	0.0448142	0.0043463	0.580185
Lesotho 2009	DHS	0.58298	0.0346623	0.0035846	0.378773
Liberia 2013	DHS	0.580665	0.0600969	0.0131712	0.346066
Macedonia 2011	MICS	0.975738	0.0070728	0.0085701	0.0086193
Madagascar 2008	DHS	0.345366	0.0880758	0.0021688	0.56439
Malawi 2010	DHS	0.729946	0.0041515	0.0233864	0.242516
Maldives 2009	DHS	0.954638	0.0134113	0.0115	0.0204512
Mali 2012	DHS	0.566754	0.0462572	0.0101291	0.37686
Moldova 2012	MICS	0.98856	0.0031184	0	0.0083212
Mongolia 2010	MICS	0.983786	0.0044611	0.0013143	0.0104383
Montenegro 2013	MICS	0.990392	0	0	0.0096081
Mozambique 2011	DHS	0.54758	0.0142025	0.024649	0.413568
Namibia 2013	DHS	0.877	0.0120155	0.0033659	0.107539
Nepal 2011	DHS	0.390498	0.0148756	0.0158253	0.578801
Niger 2012	DHS	0.316046	0.0072021	0.0137117	0.66304
Nigeria 2013	DHS	0.356705	0.0404764	0.0156507	0.587168
Pakistan 2012	DHS	0.52171	0.0412838	0.0048986	0.432108
Peru 2012	DHS	0.859031	0.0247322	0.0055346	0.110702
Philippines 2013	DHS	0.660833	0.0953453	0.0015592	0.242262
Rwanda 2010	DHS	0.767694	0.0036314	0.0031272	0.225548
São Tome & P. 2008	DHS	0.794426	0.0336104	0.0046449	0.167319
Senegal 2014	DHS	0.584521	0.0110873	0.194407	0.209985
Serbia 2014	MICS	0.982831	0.0013038	0	0.0158652
Sierra Leone 2013	DHS	0.567129	0.0577731	0.0076352	0.367462
St Lucia 2012	MICS	0.987311	0	0.0126888	0
State of Palestine 2010	MICS	0.978653	0.0118357	0.0058105	0.0078281
Suriname 2010	MICS	0.882159	0.044471	0.0407372	0.032633
Swaziland 2010	MICS	0.801995	0.0177605	0.0114733	0.168771
Tajikistan 2012	DHS	0.776286	0.108267	0.0034062	0.112041
Tanzania 2010	DHS	0.493064	0.0101422	0.0086558	0.488138
Timor Leste 2009	DHS	0.236426	0.0818781	0.0014347	0.680261
Togo 2013	DHS	0.611059	0.0031383	0.138244	0.248018
Tunisia 2011	MICS	0.984984	0.0012765	0	0.0137395
Uganda 2011	DHS	0.575823	0.0189605	0.0149376	0.390279
Ukraine 2012	MICS	0.988776	0.0016453	0	0.0095784
Vietnam 2010	MICS	0.920211	0.0085486	0.0034524	0.0677883
Zambia 2007	DHS	0.459118	0.0037027	0.0180377	0.519142
Zimbabwe 2010	DHS	0.63473	0.0156398	0.00643	0.3432

## Sheet: Plan2
Distribution of delivery assistance according to economic status in LMICs (n=80 countries)
		SBA, institutional	Home, SBA	Institutional, non-SBA	Home, non-SBA
Country	Wealth quintile	N(%)	N(%)	N(%)	N(%)	p value
Afghanistan 2010	Q1	103(12.6)	35(4.3)	6(0.7)	673(82.4)	<0.001
	Q2	173(18.5)	58(6.2)	13(1.4)	690(93.9)
	Q3	261(28.9)	50(5.5)	14(1.6)	579(64.1)
	Q4	366(39.6)	97(10.5)	9(0.9)	452(48.9)
	Q5	749(67.7)	114(10.3)	14(1.3)	229(20.7)
Albania 2008	Q1	196(91.6)	16(7.5)	0(0.0)	2(0.9)	<0.001
	Q2	158(98.1)	2(1.2)	0(0.0)	1(0.6)
	Q3	178(99.0)	0(0.0)	0(0.0)	2(1.1)
	Q4	176(99.0)	2(1.1)	0(0.0)	0(0.0)
	Q5	145(99.3)	1(0.7)	0(0.0)	0(0.0)
Armenia 2010	Q1	165(100.0)	0(0.0)	0(0.0)	0(0.0)	0.667
	Q2	205(99.5)	0(0.0)	0(0.0)	1(0.5)
	Q3	203(100.0)	0(0.0)	0(0.0)	0(0.0)
	Q4	221(99.10)	1(0.5)	0(0.0)	1(0.5)
	Q5	140(99.3)	1(0.7)	0(0.0)	0(0.0)
Azerbaijan 2006	Q1	221(66.6)	46(13.86)	3(0.9)	62(18.7)	<0.001
	Q2	260(74.90	51(14.7)	1(0.3)	35(10.1)
	Q3	275(84.6)	27(8.3)	0(0.0)	23(7.1)
	Q4	220(94.0)	8(3.4)	0(0.0)	6(2.6)
	Q5	163(99.4)	1(0.6)	0(0.0)	0(0.0)
Bangladesh 2011	Q1	124(11.6)	22(2.1)	1(0.1)	923(86.3)	<0.001
	Q2	164(17.2)	18(1.9)	4(0.4)	769(80.5)
	Q3	243(25.7)	46(4.9)	1(0.1)	655(69.3)
	Q4	391(39.0)	51(5.1)	5(0.5)	555(53.4)
	Q5	619(61.7)	53(5.3)	5(0.5)	326(32.5)
Belarus 2012	Q1	177(100.0)	0(0.0)	0(0.0)	0(0.0)	0.412
	Q2	245(100.0)	0(0.0)	0(0.0)	0(0.0)
	Q3	235(99.6)	0(0.0)	0(0.0)	1(0.4)
	Q4	286(99.6)	1(0.4)	0(0.0)	0(0.0)
	Q5	379(100.0)	0(0.0)	0(0.0)	0(0.0)
Belize 2011	Q1	171(80.7)	17(8.0)	4(1.9)	20(9.4)	<0.001
	Q2	148(98.0)	0(0.0)	1(0.7)	2(1.3)
	Q3	127(95.5)	4(3.0)	0(0.0)	2(1.5)
	Q4	123(97.6)	2(1.59)	0(0.0)	1(0.8)
	Q5	77(96.3)	1(1.3)	0(0.0)	2(2.5)
Benin 2011	Q1	1137(63.7)	27(1.5)	138(7.7)	483(27.1)	<0.001
	Q2	1325(78.6)	31(1.8)	87(5.2)	243(14.4)
	Q3	1396(84.7)	14(0.9)	67(4.1)	171(10.4)
	Q4	1458(96.1)	4(0.3)	21(1.4)	35(2.3)
	Q5	1214(98.3)	4(0.3)	6(0.5)	11(0.9)
Bhutan 2010	Q1	160(31.3)	14(2.7)	5(1.0)	332(65.0)	<0.001
	Q2	223(41.8)	17(3.2)	3(0.6)	290(54.4)
	Q3	326(61.8)	19(3.6)	2(0.4)	180(34.2)
	Q4	384(77.6)	13(2.6)	6(1.2)	92(18.6)
	Q5	376(94.2)	1(0.3)	3(0.8)	19(4.8)
Bolivia 2008	Q1	558(37.7)	106(7.2)	3(0.2)	814(55.0)	<0.001
	Q2	766(67.4)	64(5.6)	1(0.1)	306(26.9)
	Q3	886(83.6)	16(1.5)	6(0.6)	152(14.3)
	Q4	832(93.1)	3(0.3)	7(0.8)	52(5.8)
	Q5	644(98.6)	1(0.2)	2(0.3)	6(0.9)
Bosnia & Herz. 2011	Q1	112(100.0)	0(0.0)	0(0.0)	0(0.0)	0.584
	Q2	148(98.7)	1(0.7)	1(0.7)	1(0.7)
	Q3	151(99.3)	1(0.7)	0(0.0)	0(0.0)
	Q4	139(100.0)	0(0.0)	0(0.0)	0(0.0)
	Q5	165(100.0)	0(0.0)	0(0.0)	0(0.0)
Brazil 2006	Q1	1046(91.27)	3(0.3)	20(1.8)	77(6.8)	<0.001
	Q2	731(96.6)	1(0.1)	12(1.6)	13(1.7)
	Q3	468(97.5)	2(0.4)	6(1.3)	4(0.8)
	Q4	332(98.2)	1(0.3)	4(1.2)	1(0.3)
	Q5	224(99.1)	2(0.9)	0(0.0)	0(0.0)
Burkina Faso 2010	Q1	886(52.2)	10(0.6)	4(0.2)	797(47.0)	<0.001
	Q2	1200(63.9)	28(1.5)	5(0.3)	645(34.4)
	Q3	1484(74.0)	21(1.1)	2(0.1)	498(24.8)
	Q4	1634(92.2)	15(0.8)	2(0.1)	314(16.0)
	Q5	1387(95.2)	3(0.2)	4(0.3)	63(4.3)
Burundi 2010	Q1	506(54.7)	8(0.9)	3(0.3)	408(44.1)	<0.001
	Q2	566(60.5)	5(0.5)	1(1.1)	364(38.9)
	Q3	549(63.1)	9(1.0)	7(0.8)	305(35.1)
	Q4	571(65.3)	9(1.0)	3(0.3)	287(33.0)
	Q5	984(85.6)	15(1.3)	1(0.1)	149(13.0)
Cambodia 2010	Q1	495(37.8)	145(11.1)	4(0.3)	665(50.8)	<0.001
	Q2	451(46.6)	145(11.0)	0(0.0)	369(38.2)
	Q3	490(59.2)	141(17.0)	3(0.4)	194(23.4)
	Q4	629(73.3)	137(16.0)	4(0.5)	88(10.3)
	Q5	889(88.1)	98(9.6)	4(0.4)	19(1.9)
Cameroon 2011	Q1	268(18.1)	29(2.0)	3(0.2)	1183(79.8)	<0.001
	Q2	935(54.9)	49(2.9)	7(0.4)	711(41.8)
	Q3	1164(72.4)	60(3.7)	3(0.2)	380(23.7)
	Q4	1172(86.9)	51(3.8)	6(0.4)	120(8.9)
	Q5	1040(95.3)	23(2.1)	4(0.4)	24(2.2)
CAR 2010	Q1	318(30.7)	58(5.6)	52(5.0)	607(58.7)	<0.001
	Q2	416(36.9)	77(6.8)	80(7.1)	555(49.2)
	Q3	520(47.9)	64(5.9)	103(9.5)	398(36.7)
	Q4	506(61.90	58(7.1)	47(5.80	207(25.3)
	Q5	373(77.9)	32(6.7)	22(4.6)	52(10.9)
Chad 2010	Q1	44(4.8)	35(3.8)	2(0.2)	839(91.2)	<0.001
	Q2	58(5.6)	44(4.3)	4(0.4)	923(89.7)
	Q3	128(10.2)	60(4.8)	6(0.5)	1062(84.6)
	Q4	282(18.2)	145(9.4)	13(0.8)	1111(71.6)
	Q5	567(40.6)	214(15.32)	6(0.4)	610(43.7)
Comoros 2012	Q1	304(58.5)	39(7.5)	0(0.0)	177(34.0)	<0.001
	Q2	305(74.2)	26(6.3)	0(0.0)	80(19.5)
	Q3	320(83.8)	24(6.3)	3(0.8)	35(9.2)
	Q4	286(88.3)	22(6.8)	1(0.3)	15(4.6)
	Q5	285(91.1)	12(3.8)	1(0.3)	15(4.8)
Congo Brazzaville 2011	Q1	1914(75.0)	140(5.5)	7(0.3)	492(19.3)	<0.001
	Q2	1409(89.5)	57(3.6)	7(0.4)	101(6.4)
	Q3	648(96.1)	8(1.2)	2(0.3)	16(2.4)
	Q4	549(97.0)	7(1.2)	1(0.2)	9(1.6)
	Q5	412(98.6)	3(0.7)	1(0.2)	29(0.5)
Congo D.R. 2013	Q1	1719(56.3)	114(3.7)	83(2.7)	1137(37.2)	<0.001
	Q2	1623(64.4)	90(3.6)	86(3.4)	721(28.6)
	Q3	1731(73.6)	41(1.7)	52(2.2)	529(22.5)
	Q4	1709(87.5)	34(1.7)	22(1.1)	189(9.7)
	Q5	1477(97.0)	10(0.7)	13(0.9)	22(1.5)
Costa Rica 2011	Q1	287(95.4)	6(2.0)	0(0.0)	8(2.7)	0.009
	Q2	207(99.0)	0(0.0)	2(1.0)	0(0.0)
	Q3	146(99.3)	0(0.0)	1(0.7)	0(0.0)
	Q4	114(99.1)	0(0.0)	1(0.9)	0(0.0)
	Q5	80(97.6)	0(0.0)	1(1.2)	1(1.2)
Cote d'Ivoire 2011	Q1	351(31.9)	28(2.6)	13(1.2)	707(64.3)	<0.001
	Q2	533(50.0)	19(1.8)	12(1.1)	502(47.1)
	Q3	570(50.4)	18(1.6)	6(0.5)	537(47.5)
	Q4	617(73.0)	33(3.9)	5(0.6)	190(22.5)
	Q5	587(88.3)	12(1.8)	2(0.3)	64(9.6)
Dominican Republic 2013	Q1	662(93.5)	8(1.1)	3(0.4)	35(4.9)	<0.001
	Q2	513(99.2)	1(0.2)	3(0.6)	2(0.4)
	Q3	403(99.0)	0(0.0)	3(0.7)	1(0.3)
	Q4	325(99.1)	0(0.0)	2(0.6)	1(0.3)
	Q5	252(98.8)	1(0.4)	3(1.2)	1(0.4)
Egypt 2008	Q1	742(47.7)	151(9.7)	3(0.2)	659(42.4)	<0.001
	Q2	915(64.4)	125(8.8)	5(0.4)	376(26.5)
	Q3	1089(76.7)	115(8.1)	2(0.1)	214(15.1)
	Q4	1086(84.9)	82(6.4)	5(0.4)	106(8.3)
	Q5	1143(95.2)	28(2.3)	1(0.1)	29(2.4)
Ethiopia 2011	Q1	71(3.5)	6(0.3)	3(0.2)	1950(96.1)	<0.001
	Q2	43(3.6)	6(0.5)	3(0.3)	1144(95.7)
	Q3	44(4.0)	8(0.7)	2(0.2)	1041(95.1)
	Q4	92(8.5)	17(1.6)	0(0.0)	971(89.9)
	Q5	736(56.6)	22(1.7)	3(0.2)	539(41.5)
Gabon 2012	Q1	1260(69.7)	17(0.9)	17(0.9)	515(28.5)	<0.001
	Q2	780(91.0)	6(0.7)	5(0.6)	66(7.7)
	Q3	493(93.6)	8(1.5)	5(1.0)	21(4.0)
	Q4	371(93.7)	6(1.5)	2(0.5)	17(4.3)
	Q5	264(96.4)	0(0.0)	3(1.1)	7(2.6)
Gambia 2013	Q1	547(43.5)	14(1.1)	67(5.3)	630(50.1)	<0.001
	Q2	571(42.6)	19(1.4)	76(5.7)	674(50.3)
	Q3	472(43.5)	9(0.8)	69(6.4)	534(49.3)
	Q4	555(68.4)	2(0.3)	51(6.3)	203(25.0)
	Q5	543(84.2)	7(1.1)	51(7.9)	44(6.8)
Ghana 2011	Q1	493(37.4)	14(1.1)	8(0.6)	805(61.0)	<0.001
	Q2	305(52.6)	10(1.7)	7(1.2)	258(44.5)
	Q3	269(68.5)	6(1.5)	2(0.5)	116(29.5)
	Q4	266(82.9)	5(1.6)	0(0.0)	50(15.6)
	Q5	250(96.5)	1(0.4)	0(0.0)	8(3.1)
Guatemala 2008	Q1	448(23.0)	5(0.2)	4(0.2)	1626(76.6)	<0.001
	Q2	639(41.5)	14(0.9)	11(0.7)	877(56.9)
	Q3	797(65.3)	6(0.5)	4(0.3)	414(33.9)
	Q4	946(87.6)	4(0.4)	6(0.6)	124(11.5)
	Q5	514(95.36)	4(0.7)	2(0.4)	19(3.5)
Guinea 2012	Q1	179(17.6)	19(1.9)	10(1.0)	812(79.6)	<0.001
	Q2	193(1.9)	34(4.1)	27(3.2)	582(69.6)
	Q3	286(33.0)	49(5.7)	20(2.3)	511(59.0)
	Q4	482(52.5)	134(14.6)	8(0.9)	294(32.0)
	Q5	484(81.3)	65(10.9)	2(0.3)	44(7.4)
Guyana 2009	Q1	370(61.6)	64(10.7)	4(0.7)	163(27.1)	<0.001
	Q2	211(91.3)	6(2.6)	2(0.9)	12(5.2)
	Q3	228(94.2)	4(1.7)	6(2.5)	4(1.7)
	Q4	172(93.5)	7(3.8)	0(0.0)	5(2.7)
	Q5	139(93.3)	4(2.7)	0(0.0)	6(4.0)
Haiti 2012	Q1	134(10.8)	11(1.0)	3(0.2)	1093(88.1)	<0.001
	Q2	219(21.8)	12(1.2)	6(0.6)	769(76.4)
	Q3	440(41.5)	14(1.3)	6(0.6)	600(56.6)
	Q4	408(54.3)	28(3.7)	2(0.3)	313(41.7)
	Q5	381(79.1)	12(2.5)	0(0.0)	89(18.5)
Honduras 2011	Q1	1297(59.1)	16(0.7)	10(0.5)	870(39.7)	<0.001
	Q2	1281(81.8)	3(0.2)	2(0.1)	281(17.9)
	Q3	1099(90.2)	2(0.2)	4(0.3)	113(9.3)
	Q4	984(96.9)	1(0.1)	0(0.0)	31(3.1)
	Q5	713(97.7)	6(0.8)	2(0.3)	9(1.2)
India 2005	Q1	703(13.2)	395(7.4)	11(0.2)	4215(79.2)	<0.001
	Q2	1350(23.9)	488(8.7)	13(0.2)	3787(67.2)
	Q3	2542(40.7)	621(10.0)	26(0.4)	3052(48.9)
	Q4	4086(60.6)	633(9.4)	18(0.3)	2010(29.8)
	Q5	5496(85.2)	308(4.8)	21(0.3)	627(9.7)
Indonesia 2012	Q1	866(26.4)	960(29.2)	6(0.2)	1453(44.2)	<0.001
	Q2	1223(55.0)	625(28.1)	5(0.2)	372(16.7)
	Q3	1326(67.0)	478(24.2)	2(0.1)	172(8.7)
	Q4	1473(79.8)	303(16.4)	1(0.1)	69(3.7)
	Q5	1388(88.0)	152(9.6)	4(0.3)	34(2.2)
Iraq 2011	Q1	2902(63.3)	652(14.2)	11(0.2)	1022(22.3)	<0.001
	Q2	2411(73.9)	473(14.5)	26(0.8)	353(10.8)
	Q3	2063(78.1)	378(14.3)	21(0.8)	179(6.8)
	Q4	1641(81.2)	258(12.8)	8(0.4)	113(5.6)
	Q5	1244(83.9)	177(11.9)	5(0.3)	57(3.8)
Jamaica 2011	Q1	148(94.9)	4(2.6)	0(0.0)	4(2.6)	0.015
	Q2	139(99.3)	0(0.0)	1(0.7)	0(0.0)
	Q3	133(100.0)	0(0.0)	0(0.0)	0(0.0)
	Q4	105(99.1)	1(0.9)	0(0.0)	0(0.0)
	Q5	95(100.0)	0(0.0)	0(0.0)	0(0.0)
Jordan 2012	Q1	1601(98.2)	19(1.2)	1(0.1)	10(0.6)	<0.001
	Q2	1648(99.6)	5(0.3)	0(0.0)	1(0.1)
	Q3	1386(99.6)	6(0.4)	0(0.0)	0(0.0)
	Q4	993(99.5)	1(0.1)	0(0.0)	4(0.4)
	Q5	442(100.0)	0(0.0)	0(0.0)	0(0.0)
Kazakhstan 2010	Q1	380(98.7)	3(0.8)	0(0.0)	2(0.5)	0.066
	Q2	423(99.8)	1(0.2)	0(0.0)	0(0.0)
	Q3	429(99.8)	0(0.0)	0(0.0)	1(0.2)
	Q4	374(100.0)	0(0.0)	0(0.0)	0(0.0)
	Q5	414(100.0)	0(0.0)	0(0.0)	0(0.0)
Kenya 2008	Q1	184(17.2)	49(4.6)	0(0.0)	839(78.3)	<0.001
	Q2	210(31.3)	12(1.8)	1(0.2)	448(66.8)
	Q3	270(43.9)	6(1.0)	1(0.2)	338(55.0)
	Q4	333(56.0)	14(2.4)	2(0.3)	246(41.3)
	Q5	633(81.2)	6(0.8)	2(0.3)	139(17.8)
Kyrgyzstan 2012	Q1	597(98.8)	3(0.5)	1(0.2)	3(0.5)	0.308
	Q2	606(99.5)	2(0.3)	0(0.0)	1(0.2)
	Q3	617(98.6)	3(0.5)	0(0.0)	6(1.0)
	Q4	528(98.5)	1(0.2)	1(0.2)	6(1.1)
	Q5	386(100.0)	0(0.0)	0(0.0)	0(0.0)
Lao 2011	Q1	110(8.1)	17(1.2)	18(1.3)	1222(89.4)	<0.001
	Q2	213(21.1)	30(3.0)	3(0.3)	764(75.6)
	Q3	325(38.3)	57(6.7)	2(0.2)	464(54.7)
	Q4	368(55.1)	57(8.5)	0(0.0)	243(36.4)
	Q5	480(87.1)	21(3.8)	1(0.2)	49(9.0)
Lesotho 2009	Q1	277(36.9)	13(1.7)	1(0.1)	459(61.2)	<0.001
	Q2	282(49.8)	18(3.2)	1(0.2)	265(46.8)
	Q3	263(55.3)	23(4.8)	3(0.6)	187(39.3)
	Q4	298(73.8)	13(3.2)	2(0.5)	91(22.5)
	Q5	280(89.2)	10(3.2)	2(0.6)	22(7.0)
Liberia 2013	Q1	696(42.5)	58(3.5)	32(2.0)	853(52.0)	<0.001
	Q2	637(51.3)	67(5.4)	29(2.3)	509(41.0)
	Q3	573(61.2)	53(5.7)	23(2.5)	288(30.7)
	Q4	353(70.2)	40(8.0)	6(1.2)	104(20.7)
	Q5	224(81.8)	18(6.6)	0(0.0)	32(11.68)
Macedonia 2011	Q1	89(95.7)	2(2.2)	0(0.0)	2(2.2)	0.198
	Q2	96(97.00	0(0.0)	1(1.0)	2(2.0)
	Q3	106(99.1)	1(0.9)	0(0.0)	0(0.0)
	Q4	104(100.0)	0(0.0)	0(0.0)	0(0.0)
	Q5	97(97.0)	1(1.0)	2(2.0)	0(0.0)
Madagascar 2008	Q1	407(18.9)	92(4.3)	3(0.1)	1657(76.8)	<0.001
	Q2	407(25.8)	74(4.7)	2(0.1)	1094(69.4)
	Q3	486(36.6)	89(6.7)	6(0.5)	748(56.3)
	Q4	561(47.1)	162(13.6)	1(0.1)	467(39.2)
	Q5	778(67.1)	262(22.6)	4(0.4)	115(9.9)
Malawi 2010	Q1	1799(64.6)	13(0.5)	45(1.6)	927(33.3)	<0.001
	Q2	1886(67.7)	6(0.2)	67(2.4)	825(29.6)
	Q3	1933(70.6)	12(0.4)	73(2.7)	719(26.3)
	Q4	1751(78.2)	9(0.4)	59(2.6)	419(18.7)
	Q5	1415(88.8)	8(0.5)	29(1.8)	141(8.9)
Maldives 2009	Q1	484(92.0)	4(0.8)	14(2.7)	24(4.6)	<0.001
	Q2	650(94.5)	4(0.6)	11(1.6)	23(3.3)
	Q3	627(96.3)	5(0.8)	6(0.9)	13(2.0)
	Q4	366(97.9)	4(1.1)	1(0.3)	3(0.8)
	Q5	198(97.1)	6(2.9)	0(0.0)	0(0.0)
Mali 2012	Q1	330(28.7)	87(7.6)	12(1.0)	721(62.7)	<0.001
	Q2	475(39.6)	58(4.8)	15(1.3)	651(54.3)
	Q3	571(47.8)	41(3.4)	16(1.3)	566(47.4)
	Q4	873(74.2)	40(3.4)	7(0.6)	256(21.8)
	Q5	1222(94.2)	15(1.2)	10(0.8)	50(3.9)
Moldova 2012	Q1	82(97.6)	0(0.0)	0(0.0)	2(2.4)	0.081
	Q2	117(100.0)	0(0.0)	0(0.0)	0(0.0)
	Q3	115(100.0)	0(0.0)	0(0.0)	0(0.0)
	Q4	130(97.7)	2(1.5)	0(0.0)	1(0.8)
	Q5	272(99.3)	0(0.0)	0(0.0)	2(0.7)
Mongolia 2010	Q1	481(97.0)	3(0.6)	0(0.0)	12(2.4)	0.069
	Q2	382(98.5)	3(0.8)	1(0.3)	2(0.5)
	Q3	316(98.8)	0(0.0)	1(0.3)	3(0.9)
	Q4	250(99.6)	0(0.0)	1(0.4)	0(0.0)
	Q5	233(99.2)	1(0.4)	0(0.0)	1(0.4)
Montenegro 2013	Q1	79(98.8)	0(0.0)	0(0.0)	1(1.3)	0.686
	Q2	103(100.0)	0(0.0)	0(0.0)	0(0.0)
	Q3	100(99.0)	0(0.0)	0(0.0)	1(1.0)
	Q4	104(99.1)	0(0.0)	0(0.0)	1(1.0)
	Q5	105(100.0)	0(0.0)	0(0.0)	0(0.0)
Mozambique 2011	Q1	422(34.7)	25(2.1)	27(2.2)	742(61.0)	<0.001
	Q2	560(42.1)	16(1.2)	25(1.9)	729(54.8)
	Q3	751(54.4)	26(1.9)	46(3.3)	558(40.4)
	Q4	1119(74.1)	23(1.5)	42(2.8)	327(21.6)
	Q5	1349(90.0)	6(0.4)	42(2.8)	102(6.8)
Namibia 2013	Q1	485(70.6)	14(2.0)	2(0.3)	186(27.1)	<0.001
	Q2	588(83.8)	17(2.4)	1(0.1)	96(13.7)
	Q3	611(86.4)	10(1.4)	4(0.6)	82(11.6)
	Q4	624(94.8)	4(0.6)	4(0.6)	26(4.0)
	Q5	397(97.5)	3(0.7)	0(0.0)	7(1.7)
Nepal 2011	Q1	137(14.5)	4(0.4)	15(1.6)	788(83.5)	<0.001
	Q2	180(28.5)	4(0.6)	11(1.7)	437(69.2)
	Q3	250(44.7)	5(0.9)	13(2.3)	291(52.1)
	Q4	305(58.1)	18(3.4)	8(1.5)	194(37.0)
	Q5	378(85.5)	9(2.0)	1(0.2)	54(12.2)
Niger 2012	Q1	177(13.4)	5(0.4)	23(1.7)	1121(84.5)	<0.001
	Q2	276(20.9)	7(0.5)	23(1.7)	1016(76.9)
	Q3	325(23.2)	10(0.7)	18(1.3)	1050(74.8)
	Q4	516(34.2)	15(1.0)	17(1.1)	960(63.7)
	Q5	1539(78.7)	19(0.5)	9(0.5)	389(19.9)
Nigeria 2013	Q1	249(6.1)	30(0.7)	45(1.1)	3777(92.1)	<0.001
	Q2	741(16.8)	89(2.0)	131(3.0)	3462(78.3)
	Q3	1376(36.5)	172(4.6)	103(2.7)	2122(56.2)
	Q4	1977(56.4)	228(6.5)	61(1.7)	1237(35.3)
	Q5	2470(80.5)	179(5.8)	26(0.9)	394(12.8)
Pakistan 2012	Q1	412(26.6)	48(3.1)	7(0.5)	1082(69.9)	<0.001
	Q2	582(42.2)	67(4.9)	7(0.5)	724(52.5)
	Q3	684(51.3)	71(5.3)	8(0.6)	570(42.8)
	Q4	856(66.5)	65(5.1)	6(0.5)	361(28.0)
	Q5	1103(84.9)	30(2.3)	8(0.6)	158(12.2)
Peru 2012	Q1	967(58.8)	40(4.9)	24(1.5)	573(34.9)	<0.001
	Q2	1369(86.8)	38(2.4)	12(0.8)	158(10.0)
	Q3	1140(95.7)	15(1.3)	0(0.0)	36(3.0)
	Q4	777(98.7)	5(0.6)	1(0.1)	4(0.5)
	Q5	504(99.0)	4(0.8)	0(0.0)	1(0.2)
Philippines 2013	Q1	481(35.9)	102(7.6)	1(0.1)	757(56.5)	<0.001
	Q2	550(58.8)	119(12.7)	1(0.1)	265(28.3)
	Q3	612(73.3)	96(11.5)	2(0.2)	125(15.0)
	Q4	583(86.9)	49(7.3)	3(0.5)	36(5.4)
	Q5	443(93.3)	18(3.8)	0(0.0)	14(3.0)
Rwanda 2010	Q1	858(69.6)	4(0.3)	5(0.4)	365(29.6)	<0.001
	Q2	809(71.5)	4(0.4)	2(0.2)	316(27.94)
	Q3	757(75.0)	3(0.3)	4(0.2)	246(24.4)
	Q4	750(80.7)	3(0.3)	2(0.2)	174(18.7)
	Q5	812(90.5)	5(0.6)	4(0.5)	76(8.5)
São Tome & Principe 2008	Q1	201(70.8)	15(5.3)	0(0.0)	68(23.9)	<0.001
	Q2	215(72.9)	11(3.7)	1(0.3)	68(23.1)
	Q3	200(79.7)	6(2.4)	0(0.0)	45(17.9)
	Q4	190(86.4)	5(2.3)	2(0.9)	23(10.5)
	Q5	133(88.1)	7(4.6)	1(0.7)	10(6.6)
Senegal 2014	Q1	421(30.1)	12(0.9)	239(17.1)	727(52.0)	<0.001
	Q2	497(44.8)	7(0.6)	265(23.9)	341(30.7)
	Q3	533(64.7)	7(0.9)	194(23.5)	90(10.9)
	Q4	377(79.2)	5(1.1)	66(13.9)	28(5.9)
	Q5	263(80.7)	7(2.2)	48(14.7)	8(2.5)
Serbia 2014	Q1	133(97.1)	0(0.0)	0(0.0)	4(2.9)	0.106
	Q2	159(100.0)	0(0.0)	0(0.0)	0(0.0)
	Q3	196(99.5)	1(0.5)	0(0.0)	0(0.0)
	Q4	209(99.5)	0(0.0)	0(0.0)	1(0.5)
	Q5	252(98.4)	1(0.4)	0(0.0)	3(1.2)
Sierra Leone 2013	Q1	814(49.6)	62(3.8)	17(1.0)	748(45.6)	<0.001
	Q2	737(52.1)	48(3.4)	14(1.0)	617(43.6)
	Q3	774(53.2)	73(5.0)	9(0.6)	600(41.2)
	Q4	1019(66.0)	125(8.1)	11(0.7)	390(25.2)
	Q5	786(75.8)	112(10.8)	7(0.7)	132(12.7)
St Lucia 2012	Q1	20(95.24)	0(0.0)	1(4.76)	0(0.0)	0.447
	Q2	26(100.0)	0(0.0)	0(0.0)	0(0.0)
	Q3	22(100.0)	0(0.0)	0(0.0)	0(0.0)
	Q4	17(100.0)	0(0.0)	0(0.0)	0(0.0)
	Q5	12(100.0)	0(0.0)	0(0.0)	0(0.0)
State of Palestine 2010	Q1	965(97.7)	11(1.1)	4(0.4)	8(0.8)	0.086
	Q2	1020(98.0)	18(1.7)	0(0.0)	3(0.3)
	Q3	896(98.3)	5(0.6)	1(0.1)	4(0.4)
	Q4	810(98.3)	11(1.3)	1(0.1)	2(0.2)
	Q5	562(98.4)	7(1.2)	2(0.4)	0(0.0)
Suriname 2010	Q1	473(73.3)	49(7.6)	75(11.6)	48(7.4)	<0.001
	Q2	194(90.20	8(3.7)	7(3.3)	6(2.8)
	Q3	159(94.1)	7(4.1)	2(1.2)	1(0.6)
	Q4	127(96.2)	3(2.3)	1(0.8)	1(0.8)
	Q5	100(96.2)	1(1.0)	2(2.0)	1(1.0)
Swaziland 2010	Q1	125(62.3)	2(1.0)	3(1.5)	71(35.3)	<0.001
	Q2	141(74.2)	4(2.1)	4(2.1)	41(21.5)
	Q3	185(84.5)	4(1.8)	1(0.5)	29(13.2)
	Q4	173(85.2)	7(3.5)	3(1.5)	20(9.9)
	Q5	188(91.7)	4(2.0)	1(0.5)	12(5.9)
Tajikistan 2012	Q1	325(58.9)	91(16.5)	3(0.5)	133(24.1)	<0.001
	Q2	424(69.2)	104(17.0)	2(0.3)	83(13.5)
	Q3	503(78.7)	84(13.2)	2(0.3)	50(7.8)
	Q4	557(88.6)	33(5.3)	4(0.6)	35(5.6)
	Q5	697(91.5)	40(5.3)	2(0.3)	23(3.0)
Tanzania 2010	Q1	292(30.3)	5(0.5)	8(0.8)	658(68.3)	<0.001
	Q2	396(35.9)	13(1.2)	14(1.3)	680(61.7)
	Q3	459(44.7)	17(1.7)	6(0.6)	544(53.0)
	Q4	567(57.3)	20(2.0)	2(0.2)	400(40.4)
	Q5	612(81.4)	26(3.5)	4(0.5)	110(14.6)
Timor Leste 2009	Q1	94(6.7)	79(5.6)	2(0.1)	1238(87.6)	<0.001
	Q2	104(8.7)	85(7.1)	2(0.2)	1011(84.1)
	Q3	204(16.0)	119(9.3)	2(0.2)	953(74.6)
	Q4	340(29.6)	119(10.4)	2(0.2)	687(59.8)
	Q5	503(58.2)	97(11.2)	1(0.1)	264(30.5)
Togo 2013	Q1	341(27.5)	1(0.1)	217(17.5)	681(54.9)	<0.001
	Q2	332(38.3)	2(0.2)	198(22.9)	334(38.6)
	Q3	457(55.2)	1(0.1)	198(23.9)	172(20.8)
	Q4	590(88.2)	3(0.5)	46(6.9)	30(4.5)
	Q5	609(95.1)	5(0.8)	15(2.3)	12(1.9)
Tunisia 2011	Q1	276(91.4)	0(0.0)	0(0.0)	26(8.6)	<0.001
	Q2	248(99.2)	1(0.4)	0(0.0)	1(0.4)
	Q3	195(99.5)	1(0.5)	0(0.0)	0(0.0)
	Q4	233(99.6)	0(0.0)	0(0.0)	1(0.4)
	Q5	152(99.4)	0(0.0)	0(0.0)	1(0.7)
Uganda 2011	Q1	464(38.2)	26(2.1)	14(1.2)	711(58.5)	<0.001
	Q2	499(53.4)	12(1.3)	13(1.4)	411(44.0)
	Q3	493(57.6)	12(1.4)	16(1.9)	335(39.1)
	Q4	471(62.3)	21(2.8)	11(1.5)	253(33.5)
	Q5	894(89.5)	13(1.3)	9(0.9)	83(8.3)
Ukraine 2012	Q1	324(98.8)	2(0.6)	0(0.0)	2(0.6)	0.05
	Q2	369(97.9)	0(0.0)	0(0.0)	8(2.1)
	Q3	249(99.2)	0(0.0)	0(0.0)	2(0.8)
	Q4	300(100.0)	0(0.0)	0(0.0)	0(0.0)
	Q5	304(98.7)	2(0.7)	0(0.0)	2(0.7)
Vietnam 2010	Q1	200(61.2)	7(2.1)	3(0.9)	117(35.8)	<0.001
	Q2	210(94.2)	3(1.4)	2(0.9)	8(3.6)
	Q3	237(98.8)	1(0.4)	0(0.0)	2(0.8)
	Q4	263(98.1)	3(1.1)	0(0.0)	2(0.8)
	Q5	304(99.7)	0(0.0)	0(0.0)	1(0.3)
Zambia 2007	Q1	237(27.6)	1(0.1)	15(1.7)	607(70.6)	<0.001
	Q2	237(27.5)	6(0.7)	20(2.3)	599(69.5)
	Q3	355(39.2)	1(0.1)	20(2.2)	529(58.5)
	Q4	611(71.3)	2(0.2)	11(1.3)	233(27.2)
	Q5	450(90.0)	5(1.0)	5(1.0)	40(8.0)
Zimbabwe 2010	Q1	385(45.0)	17(2.0)	7(0.8)	447(52.2)	<0.001
	Q2	396(54.0)	14(1.9)	5(0.7)	324(43.8)
	Q3	410(61.8)	13(2.0)	5(0.8)	235(35.4)
	Q4	622(78.7)	17(2.2)	5(0.6)	146(18.5)
	Q5	496(89.7)	5(0.9)	1(0.2)	51(9.2)

## Sheet: Plan3
Distribution of delivery assistance according to place of residence in low and middle-income countries (n=80 countries)
		SBA, institutional	Home, SBA	Institutional, non-SBA	Home, non-SBA
Country	Place of residence	N(%)				p value
Afghanistan 2010	urban	770(64.4)	113(9.5)	18(1.5)	294(24.6)	<0.001
	rural	882(25.3)	241(6.9)	38(1.1)	2329(66.7)
Albania 2008	urban	384(98.7)	3(0.8)	0(0.0)	2(0.5)	0.019
	rural	469(95.7)	18(3.7)	0(0.0)	3(0.6)
Armenia 2010	urban	600(99.3)	2(0.3)	0(0.0)	2(0.3)	0.329
	rural	334(100.0)	0(0.0)	0(0.0)	0(0.0)
Azerbaijan 2006	urban	595(91.1)	30(4.6)	2(0.3)	26(4.0)	<0.001
	rural	544(72.6)	103(13.8)	2(0.3)	100(13.4)
Bangladesh 2011	urban	755(48.4)	87(5.6)	10(0.6)	707(45.4)	<0.001
	rural	786(23.0)	103(3.0)	6(0.2)	2521(73.8)
Belarus 2012	urban	987(99.8)	1(0.1)	0(0.0)	1(0.1)	0.712
	rural	335(100.0)	0(0.0)	0(0.0)	0(0.0)
Belize	urban	241(97.6)	2(0.8)	0(0.0)	4(1.6)	0.001
	rural	405(89.0)	22(4.8)	5(1.1)	23(5.1)
Benin 2011	urban	2665(89.6)	19(0.6)	59(2.0)	233(7.8)	<0.001
	rural	3865(78.9)	61(1.3)	260(5.3)	710(14.5)
Bhutan 2010	urban	448(87.6)	4(0.7)	6(1.1)	59(10.6)	<0.001
	rural	981(51.4)	60(3.1)	13(0.7)	854(44.8)
Bolivia 2008	urban	2397(89.3)	22(0.8)	13(0.5)	253(9.4)	<0.001
	rural	1289(50.8)	168(6.6)	6(0.2)	1077(42.4)
Bosnia & Herz. 2011	urban	242(99.6)	1(0.4)	0(0.0)	0(0.0)	0.689
	rural	437(99.6)	1(0.2)	0(0.0)	1(0.2)
Brazil 2006	urban	1872(96.0)	5(0.3)	30(1.5)	43(2.2)	<0.001
	rural	929(93.2)	4(0.4)	12(1.2)	52(5.2)
Burkina Faso 2010	urban	1856(93.4)	7(0.4)	5(0.5)	119(6.0)	<0.001
	rural	4735(67.5)	70(1.0)	12(0.2)	2198(31.3)
Burundi 2010	urban	745(89.2)	13(1.6)	0(0.0)	77(9.2)	<0.001
	rural	2431(62.1)	33(0.8)	15(0.4)	1436(36.7)
Cambodia 2010	urban	1057(83.1)	129(10.1)	5(0.4)	81(6.4)	<0.001
	rural	1907(51.8)	537(14.5)	10(0.3)	1254(33.8)
Cameroon 2011	urban	2463(85.1)	76(2.6)	10(0.4)	347(12.0)	<0.001
	rural	2116(48.8)	136(3.1)	13(0.3)	2071(47.8)
CAR 2010	urban	1025(70.9)	99(6.9)	46(3.2)	276(19.1)	<0.001
	rural	1108(35.8)	190(6.1)	258(8.3)	1543(49.8)
Chad 2010	urban	829(33.8)	308(12.6)	18(0.7)	1297(52.9)	<0.001
	rural	250(6.8)	190(5.1)	13(0.4)	3248(87.8)
Comoros 2012	urban	600(89.3)	27(4.0)	1(0.2)	44(6.6)	<0.001
	rural	900(70.4)	96(7.5)	4(0.3)	278(21.8)
Congo Brazzaville 2011	urban	1483(95.7)	29(1.9)	4(0.3)	33(2.1)	<0.001
	rural	3449(81.4)	186(4.4)	14(0.3)	587(13.9)
Congo D.R. 2013	urban	3067(90.2)	59(1.7)	35(1.0)	240(7.1)	<0.001
	rural	5192(64.9)	230(2.9)	221(2.8)	2358(29.5)
Costa Rica 2011	urban	426(99.1)	0(0.0)	3(0.7)	1(0.2)	0.007
	rural	408(96.2)	6(1.4)	2(0.5)	8(1.9)
Cote d'Ivoire 2011	urban	1297(80.2)	33(2.0)	6(0.4)	281(17.38)	<0.001
	rural	1361(42.7)	77(2.4)	32(1.0)	1719(53.9)
Dominican Republic 2013	urban	1525(98.2)	5(0.3)	9(0.6)	14(0.9)	<0.001
	rural	630(95.2)	5(0.8)	3(0.5)	24(3.6)
Egypt 2008	urban	2195(85.5)	132(5.1)	6(0.2)	233(9.1)	<0.001
	rural	2780(64.5)	369(8.6)	10(0.2)	1151(26.7)
Ethiopia 2011	urban	728(61.2)	19(1.6)	2(0.2)	441(37.1)	<0.001
	rural	258(4.7)	40(0.8)	9(0.2)	5204(94.4)
Gabon 2012	urban	2193(91.8)	17(0.7)	16(0.7)	163(6.8)	<0.001
	rural	975(66.2)	20(1.4)	16(1.1)	463(31.4)
Gambia 2013	urban	1353(78.0)	12(0.7)	129(7.4)	240(13.8)	<0.001
	rural	1335(39.2)	39(1.2)	185(5.4)	1845(54.2)
Ghana 2011	urban	661(83.6)	7(0.9)	2(0.3)	121(15.3)	<0.001
	rural	922(44.3)	29(1.4)	15(1.4)	1116(53.6)
Guatemala 2008	urban	1786(75.1)	14(0.6)	10(0.4)	568(23.9)	<0.001
	rural	1598(38.7)	19(0.5)	17(0.4)	2492(60.4)
Guinea 2012	urban	854(67.8)	184(14.6)	5(0.4)	216(17.2)	<0.001
	rural	770(25.9)	117(3.9)	62(2.1)	2027(68.1)
Guyana 2009	urban	241(98.0)	4(1.6)	1(0.4)	0(0.0)	<0.001
	rural	879(75.7)	81(7.0)	11(1.0)	190(16.4)
Haiti 2012	urban	881(57.2)	37(2.4)	5(0.3)	616(40.0)	<0.001
	rural	701(23.4)	40(1.3)	12(0.4)	2248(74.9)
Honduras 2011	urban	2158(94.0)	15(0.7)	3(0.1)	119(5.2)	<0.001
	rural	3216(72.6)	13(0.3)	15(0.3)	1185(26.8)
India 2005	urban	7928(69.1)	728(6.4)	41(0.4)	2773(24.2)	<0.001
	rural	6249(33.0)	1717(9.1)	48(0.3)	10918(57.7)
Indonesia 2012	urban	3914(79.0)	686(13.9)	13(0.3)	340(6.9)	<0.001
	rural	2362(39.6)	1832(30.7)	5(0.1)	1760(29.5)
Iraq 2011	urban	6097(78.4)	1079(13.9)	53(0.7)	549(7.1)	<0.001
	rural	4164(67.0)	859(13.8)	18(0.3)	1175(18.9)
Jamaica 2011	urban	378(99.0)	3(0.8)	1(0.3)	0(0.0)	0.077
	rural	242(97.6)	2(0.8)	0(0.0)	4(1.6)
Jordan 2012	urban	4136(99.1)	27(0.7)	1(0.0)	11(0.3)	0.124
	rural	1934(99.6)	4(0.2)	0(0.0)	4(0.2)
Kazakhstan 2010	urban	1066(99.7)	0(0.0)	0(0.0)	3(0.3)	0.028
	rural	954(99.6)	4(0.4)	0(0.0)	0(0.0)
Kenya 2008	urban	679(74.3)	10(1.1)	5(0.6)	220(24.1)	<0.001
	rural	951(33.7)	77(2.7)	1(0.0)	1790(63.5)
Kyrgyzstan 2012	urban	705(99.6)	0(0.0)	0(0.0)	3(0.4)	0.238
	rural	2029(98.8)	9(0.4)	2(0.1)	13(0.6)
Lao 2011	urban	631(70.9)	50(5.6)	1(0.1)	208(23.4)	<0.001
	rural	865(24.3)	132(3.7)	23(0.7)	2534(71.3)
Lesotho 2009	urban	356(86.0)	14(3.4)	3(0.7)	41(9.9)	<0.001
	rural	1044(49.8)	63(3.0)	6(0.3)	983(46.9)
Liberia 2013	urban	998(68.4)	83(5.7)	20(1.4)	358(24.5)	<0.001
	rural	1485(47.4)	153(4.9)	70(2.2)	1428(45.5)
Macedonia 2011	urban	259(98.1)	2(0.8)	3(1.1)	0(0.0)	0.067
	rural	233(97.5)	2(0.8)	0(0.0)	4(1.7)
Madagascar 2008	urban	786(60.5)	260(20.0)	3(0.2)	251(19.3)	<0.001
	rural	1853(30.3)	419(6.9)	13(0.2)	3830(62.6)
Malawi 2010	urban	993(88.2)	4(0.4)	23(2.0)	106(9.4)	<0.001
	rural	7791(70.8)	44(0.4)	250(2.3)	2925(26.6)
Maldives 2009	urban	312(97.8)	6(1.9)	0(0.0)	1(0.3)	0.001
	rural	2013(94.8)	17(0.8)	32(1.5)	62(2.9)
Mali 2012	urban	1412(92.5)	19(1.3)	9(0.6)	86(5.6)	<0.001
	rural	2059(45.9)	222(4.9)	51(1.1)	2158(48.1)
Moldova 2012	urban	403(99.50	0(0.0)	0(0.0)	2(0.5)	0.213
	rural	313(98.4)	2(0.6)	0(0.0)	3(0.9)
Mongolia 2010	urban	773(99.2)	3(0.4)	0(0.0)	3(0.3)	0.03
	rural	889(97.6)	4(0.4)	3(0.3)	15(1.7)
Montenegro 2013	urban	315(99.4)	0(0.0)	0(0.0)	2(0.6)	0.928
	rural	176(99.4)	0(0.0)	0(0.0)	1(0.5)
Mozambique 2011	urban	1867(82.8)	14(0.6)	65(2.9)	308(13.7)	<0.001
	rural	2334(49.8)	82(1.8)	117(2.5)	2150(45.9)
Namibia 2013	urban	1325(94.1)	10(0.7)	6(0.4)	67(4.8)	<0.001
	rural	1380(78.7)	38(2.2)	5(0.3)	330(18.8)
Nepal 2011	urban	460(72.4)	13(2.1)	3(0.5)	159(25.0)	<0.001
	rural	790(32.0)	27(1.1)	45(1.8)	1605(65.1)
Niger 2012	urban	1471(86.0)	15(0.9)	7(0.4)	217(12.7)	<0.001
	rural	1362(23.5)	41(0.7)	83(1.4)	4319(74.4)
Nigeria 2013	urban	4006(63.9)	369(5.9)	80(1.3)	1813(28.9)	<0.001
	rural	2807(22.3)	329(2.6)	286(2.3)	9179(72.8)
Pakistan 2012	urban	1917(66.8)	98(3.4)	15(0.5)	841(29.3)	<0.001
	rural	1720(43.2)	183(4.6)	21(0.5)	2054(51.6)
Peru 2012	urban	3184(94.8)	30(0.9)	9(0.3)	136(4.1)	<0.001
	rural	1573(67.0)	112(4.8)	28(1.2)	636(27.1)
Philippines 2013	urban	1296(74.4)	146(8.4)	1(0.1)	298(17.1)	<0.001
	rural	1373(54.6)	238(9.5)	6(0.2)	899(35.7)
Rwanda 2010	urban	595(85.7)	5(0.7)	3(0.4)	91(13.1)	<0.001
	rural	3391(75.3)	14(0.3)	14(0.3)	1086(24.1)
São Tome & Principe 2008	urban	397(84.8)	17(3.6)	0(0.0)	54(11.5)	<0.001
	rural	542(73.9)	27(3.7)	4(0.6)	160(21.8)
Senegal 2014	urban	932(73.9)	22(1.7)	201(15.9)	107(8.5)	<0.001
	rural	1159(40.3)	16(0.6)	611(21.3)	1087(37.8)
Serbia 2014	urban	595(99.2)	1(0.2)	0(0.0)	4(0.7)	0.711
	rural	354(98.6)	1(0.3)	0(0.0)	4(1.11)
Sierra Leone 2013	urban	1558(72.9)	198(9.3)	20(0.9)	360(16.9)	<0.001
	rural	2572(51.9)	222(4.5)	38(0.8)	2127(42.9)
St Lucia 2012	urban	33(100.0)	0(0.0)	0(0.0)	0(0.0)	0.474
	rural	64(98.5)	0(0.0)	1(1.5)	0(0.0)
State of Palestine 2010	urban	3498(98.4)	40(1.1)	16(0.5	25(0.7)	0.072
	rural	755(97.4)	12(1.6)	10(1.3)	10(1.3)
Suriname 2010	urban	375(93.1)	14(3.5)	6(1.5)	8(2.0)	<0.001
	rural	678(78.7)	54(6.3)	81(9.4)	49(5.7)
Swaziland 2010	urban	277(85.5)	10(3.1)	3(1.0)	34(10.5)	0.001
	rural	535(77.1)	11(1.6)	9(1.3)	139(20.0)
Tajikistan 2012	urban	857(88.7)	58(6.0)	3(0.3)	48(5.0)	<0.001
	rural	1649(74.0)	294(13.2)	10(0.5)	276(12.4)
Tanzania 2010	urban	722(79.1)	22(2.4)	6(0.7)	163(17.9)	<0.001
	rural	1604(40.9)	59(1.5)	28(0.7)	2229(56.9)
Timor Leste 2009	urban	580(44.4)	89(6.8)	4(0.3)	632(48.4)	<0.001
	rural	665(14.5)	410(8.9)	5(0.1)	3521(76.5)
Togo 2013	urban	1130(91.9)	9(0.7)	35(2.9)	55(4.5)	<0.001
	rural	1199(39.8)	3(0.1)	639(21.2)	1174(38.9)
Tunisia 2011	urban	642(99.4)	0(0.0)	0(0.0)	4(0.6)	<0.001
	rural	462(94.5)	2(0.4)	0(0.0)	25(5.1)
Uganda 2011	urban	909(88.8)	15(1.5)	9(0.9)	91(8.9)	<0.001
	rural	1912(51.2)	69(1.9)	54(1.5)	1702(45.5)
Ukraine 2012	urban	981(99.1)	2(0.2)	0(0.0)	7(0.7)	0.5
	rural	565(98.4)	2(0.4)	0(0.0)	7(1.2)
Vietnam 2010	urban	530(97.8)	3(0.6)	0(0.0)	9(1.7)	<0.001
	rural	684(83.3)	11(1.3)	5(0.6)	121(14.7)
Zambia 2007	urban	1039(79.9)	5(0.4)	15(1.2)	242(18.6)	<0.001
	rural	851(31.7)	10(0.4)	56(2.1)	1766(65.8)
Zimbabwe 2010	urban	902(85.8)	12(1.1)	2(0.2)	135(12.8)	<0.001
	rural	1407(55.5)	54(2.1)	21(0.8)	1068(41.9)
