# Supplementary material for: Inequalities in the coverage of place of delivery and skilled birth attendance: analyses of cross-sectional surveys in 80 low and middle-income countries
Source: Springer Nature journal article supplement (doi:10.1186/s12978-016-0192-2), 2016-06-17
Supplement: MOESM1 [file 10272206]

## Appendix A: DHS and MICS QUESTIONNAIRE

### DHS QUESTIONNAIRE

|            |                                                                                                                                                                                                                                                         |                                                                                                                                                                                                                                                                                               |                                                                                                                                                                                                                                                                                               |
|------------|---------------------------------------------------------------------------------------------------------------------------------------------------------------------------------------------------------------------------------------------------------|-----------------------------------------------------------------------------------------------------------------------------------------------------------------------------------------------------------------------------------------------------------------------------------------------|-----------------------------------------------------------------------------------------------------------------------------------------------------------------------------------------------------------------------------------------------------------------------------------------------|
| 429<br>(2) | <p>Who assisted with the delivery of (NAME)?</p> <p>Anyone else?</p> <p>PROBE FOR THE TYPE(S) OF PERSON(S) AND RECORD ALL MENTIONED.</p> <p>IF RESPONDENT SAYS NO ONE ASSISTED, PROBE TO DETERMINE WHETHER ANY ADULTS WERE PRESENT AT THE DELIVERY.</p> | <p><b>HEALTH PERSONNEL</b></p> <p>DOCTOR ..... A</p> <p>NURSE/MIDWIFE ..... B</p> <p>AUXILIARY<br/>MIDWIFE ..... C</p> <p><b>OTHER PERSON</b></p> <p>TRADITIONAL BIRTH ATTENDANT ..... D</p> <p>RELATIVE/FRIEND ..... E</p> <p>OTHER ..... X<br/>(SPECIFY)</p> <p>NO ONE ASSISTED ..... Y</p> | <p><b>HEALTH PERSONNEL</b></p> <p>DOCTOR ..... A</p> <p>NURSE/MIDWIFE ..... B</p> <p>AUXILIARY<br/>MIDWIFE ..... C</p> <p><b>OTHER PERSON</b></p> <p>TRADITIONAL BIRTH ATTENDANT ..... D</p> <p>RELATIVE/FRIEND ..... E</p> <p>OTHER ..... X<br/>(SPECIFY)</p> <p>NO ONE ASSISTED ..... Y</p> |
|------------|---------------------------------------------------------------------------------------------------------------------------------------------------------------------------------------------------------------------------------------------------------|-----------------------------------------------------------------------------------------------------------------------------------------------------------------------------------------------------------------------------------------------------------------------------------------------|-----------------------------------------------------------------------------------------------------------------------------------------------------------------------------------------------------------------------------------------------------------------------------------------------|

| NO.        | QUESTIONS AND FILTERS                                                                                                                                                                                               | LAST BIRTH                                                                                                                                                                                                                                                                                                                                                                                                                                                                                                 |                                                                                                                                                                                                                                                                                                                                                                                                                                                                                                            | NEXT-TO-LAST BIRTH |  |
|------------|---------------------------------------------------------------------------------------------------------------------------------------------------------------------------------------------------------------------|------------------------------------------------------------------------------------------------------------------------------------------------------------------------------------------------------------------------------------------------------------------------------------------------------------------------------------------------------------------------------------------------------------------------------------------------------------------------------------------------------------|------------------------------------------------------------------------------------------------------------------------------------------------------------------------------------------------------------------------------------------------------------------------------------------------------------------------------------------------------------------------------------------------------------------------------------------------------------------------------------------------------------|--------------------|--|
|            |                                                                                                                                                                                                                     | NAME                                                                                                                                                                                                                                                                                                                                                                                                                                                                                                       |                                                                                                                                                                                                                                                                                                                                                                                                                                                                                                            | NAME               |  |
| 430<br>(2) | <p>Where did you give birth to (NAME)?</p> <p>PROBE TO IDENTIFY THE TYPE OF SOURCE.</p> <p>IF UNABLE TO DETERMINE IF PUBLIC OR PRIVATE SECTOR, WRITE THE NAME OF THE PLACE.</p> <p>_____</p> <p>(NAME OF PLACE)</p> | <p><b>HOME</b></p> <p>HER HOME ..... 11</p> <p>(SKIP TO 434) ←</p> <p>OTHER HOME ..... 12</p> <p><b>PUBLIC SECTOR</b></p> <p>GOVERNMENT HOSPITAL ... 21</p> <p>GOVERNMENT HEALTH CENTER ..... 22</p> <p>GOVERNMENT HEALTH POST ..... 23</p> <p>OTHER PUBLIC SECTOR<br/>_____ 26<br/>(SPECIFY)</p> <p><b>PRIVATE MEDICAL SECTOR</b></p> <p>PRIVATE HOSPITAL/<br/>CLINIC ..... 31</p> <p>OTHER PRIVATE MEDICAL SECTOR<br/>_____ 36<br/>(SPECIFY)</p> <p>OTHER ..... 96<br/>(SPECIFY)<br/>(SKIP TO 434) ←</p> | <p><b>HOME</b></p> <p>HER HOME ..... 11</p> <p>(SKIP TO 434) ←</p> <p>OTHER HOME ..... 12</p> <p><b>PUBLIC SECTOR</b></p> <p>GOVERNMENT HOSPITAL ... 21</p> <p>GOVERNMENT HEALTH CENTER ..... 22</p> <p>GOVERNMENT HEALTH POST ..... 23</p> <p>OTHER PUBLIC SECTOR<br/>_____ 26<br/>(SPECIFY)</p> <p><b>PRIVATE MEDICAL SECTOR</b></p> <p>PRIVATE HOSPITAL/<br/>CLINIC ..... 31</p> <p>OTHER PRIVATE MEDICAL SECTOR<br/>_____ 36<br/>(SPECIFY)</p> <p>OTHER ..... 96<br/>(SPECIFY)<br/>(SKIP TO 434) ←</p> |                    |  |

### MICS QUESTIONNAIRE

|                                                                                                                                                                                                                                                                                                              |                                                                                                                                                                                                                                                                                                                                                                                                                                                                                        |                                                    |
|--------------------------------------------------------------------------------------------------------------------------------------------------------------------------------------------------------------------------------------------------------------------------------------------------------------|----------------------------------------------------------------------------------------------------------------------------------------------------------------------------------------------------------------------------------------------------------------------------------------------------------------------------------------------------------------------------------------------------------------------------------------------------------------------------------------|----------------------------------------------------|
| <p><b>MN17.</b> WHO ASSISTED WITH THE DELIVERY OF (name)?</p> <p><i>Probe:</i><br/>ANYONE ELSE?</p> <p><i>Probe for the type of person assisting and circle all answers given.</i></p> <p><i>If respondent says no one assisted, probe to determine whether any adults were present at the delivery.</i></p> | <p>Health professional:</p> <p>Doctor ..... A</p> <p>Nurse / Midwife ..... B</p> <p><b>Auxiliary midwife</b> ..... C</p> <p>Other person</p> <p>Traditional birth attendant ..... F</p> <p>Community health worker ..... G</p> <p>Relative / Friend ..... H</p> <p>Other (specify) ..... X</p> <p>No one ..... Y</p>                                                                                                                                                                   |                                                    |
| <p><b>MN18.</b> WHERE DID YOU GIVE BIRTH TO (name)?</p> <p><i>Probe to identify the type of source.</i></p> <p><i>If unable to determine whether public or private, write the name of the place.</i></p> <p>_____</p> <p>(Name of place)</p>                                                                 | <p>Home</p> <p>Respondent's home ..... 11</p> <p>Other home ..... 12</p> <p>Public sector</p> <p>Government hospital ..... 21</p> <p>Government clinic / health centre ..... 22</p> <p>Government health post ..... 23</p> <p>Other public (specify) ..... 26</p> <p>Private Medical Sector</p> <p>Private hospital ..... 31</p> <p>Private clinic ..... 32</p> <p>Private maternity home ..... 33</p> <p>Other private medical (specify) ..... 36</p> <p>Other (specify) ..... 96</p> | <p>11 ⇒ MN20</p> <p>12 ⇒ MN20</p> <p>96 ⇒ MN20</p> |
