# Supplementary material for: Inequalities in the coverage of place of delivery and skilled birth attendance: analyses of cross-sectional surveys in 80 low and middle-income countries
Source: Springer Nature journal article supplement (doi:10.1186/s12978-016-0192-2), 2016-06-17
Supplement: MOESM3 [file 10272206]

**Web appendix C:** Distribution of place of delivery and type of professional in countries with at least 10% of home SBA deliveries (Azerbaijan, Cambodia, Indonesia, Iraq, Philippines and Tajikistan) or at least 10% of institutional deliveries by an unskilled worker (Senegal and Togo), by urban-rural residence.

| Country          | Place | Institutional, SBA |           |         | Home, SBA   |           |         | Institutional, non-SBA |         |         | Home, non-SBA |           |         |
|------------------|-------|--------------------|-----------|---------|-------------|-----------|---------|------------------------|---------|---------|---------------|-----------|---------|
|                  |       | N (%)              | 95% CI    | p value | N (%)       | 95% CI    | p value | N (%)                  | 95% CI  | p value | N (%)         | 95% CI    | p value |
| Azerbaijan 2006  | urban | 595 (91.1)         | 88.7-93.1 | <0.001  | 30 (4.6)    | 3.2-6.5   | <0.001  | 2 (0.3)                | 0.0-0.1 | 0.89    | 26 (4.0)      | 2.7-5.8   | <0.001  |
|                  | rural | 544 (72.6)         | 69.3-75.7 |         | 103 (13.8)  | 11.5-16.4 |         | 2 (0.3)                | 0.1-1.1 |         | 100 (13.4)    | 11.1-16.0 |         |
| Cambodia 2010    | urban | 1057 (83.1)        | 80.9-85.1 | <0.001  | 129 (10.1)  | 8.6-11.9  | <0.001  | 5 (0.4)                | 0.2-1.0 | 0.55    | 81 (6.4)      | 5.2-7.8   | <0.001  |
|                  | rural | 1907 (51.8)        | 49.8-53.0 |         | 537 (14.5)  | 13.4-15.7 |         | 10 (0.3)               | 0.1-0.5 |         | 1254 (33.8)   | 32.3-35.4 |         |
| Indonesia 2012   | urban | 3914 (79.0)        | 77.9-80.0 | <0.001  | 686 (13.9)  | 12.9-14.8 | <0.001  | 13 (0.3)               | 0.2-0.5 | 0.03    | 340 (6.9)     | 6.2-7.6   | <0.001  |
|                  | rural | 2362 (39.6)        | 38.4-40.9 |         | 1832 (30.7) | 29.6-31.9 |         | 5 (0.1)                | 0.0-0.2 |         | 1760 (29.5)   | 28.4-30.7 |         |
| Iraq 2011        | urban | 6097 (78.4)        | 77.5-79.3 | <0.001  | 1079 (13.9) | 13.1-14.7 | 0.93    | 53 (0.7)               | 0.5-0.9 | 0.001   | 549 (7.1)     | 6.5-7.6   | <0.001  |
|                  | rural | 4164 (67.0)        | 65.8-68.1 |         | 859 (13.8)  | 13.0-14.7 |         | 18 (0.3)               | 0.2-0.5 |         | 1175 (18.9)   | 17.9-20.0 |         |
| Philippines 2013 | urban | 1296 (74.4)        | 72.3-76.4 | <0.001  | 146 (8.4)   | 7.2-9.8   | 0.23    | 1 (0.1)                | 0.0-0.4 | 0.20    | 298 (17.1)    | 15.4-19.0 | <0.001  |
|                  | rural | 1373 (54.6)        | 52.6-56.5 |         | 238 (9.5)   | 8.4-10.7  |         | 6 (0.2)                | 0.1-0.5 |         | 899 (35.7)    | 33.9-37.6 |         |
| Tajikistan 2012  | urban | 857 (88.7)         | 86.6-90.6 | <0.001  | 58 (6.0)    | 4.7-7.7   | <0.001  | 3 (0.3)                | 0.1-1.0 | 0.57    | 48 (5.0)      | 3.8-6.5   | <0.001  |
|                  | rural | 1649 (74.0)        | 72.1-75.8 |         | 294 (13.2)  | 11.8-14.7 |         | 10 (0.5)               | 0.2-0.8 |         | 276 (12.4)    | 11.1-13.8 |         |

|                 |       |                |           |        |             |         |        |               |               |        |                |           |        |
|-----------------|-------|----------------|-----------|--------|-------------|---------|--------|---------------|---------------|--------|----------------|-----------|--------|
| Senegal<br>2014 | urban | 932<br>(73.9)  | 71.4-76.2 | <0.001 | 22<br>(1.7) | 1.2-2.6 | 0.001  | 201<br>(15.9) | 14.0-<br>18.1 | <0.001 | 107<br>(8.5)   | 7.1-10.1  | <0.001 |
|                 | rural | 1159<br>(40.3) | 38.6-42.1 |        | 16<br>(0.6) | 0.3-0.9 |        | 611<br>(21.3) | 19.8-<br>22.8 |        | 1087<br>(37.8) | 36.1-39.6 |        |
| Togo<br>2013    | urban | 1130<br>(91.9) | 90.3-93.3 | <0.001 | 9<br>(0.7)  | 0.4-1.4 | <0.001 | 35<br>(2.9)   | 2.1-4.0       | <0.001 | 55<br>(4.5)    | 3.5-5.8   | <0.001 |
|                 | rural | 1199<br>(39.8) | 38.0-41.5 |        | 3<br>(0.1)  | 0.0-0.3 |        | 639<br>(21.2) | 19.8-<br>22.7 |        | 1174<br>(38.9) | 37.3-40.7 |        |

p: p value of Fisher's exact test; SBA: skilled birth attendant; CI: confidence interval
