# Supplementary material for: Inequalities in the coverage of place of delivery and skilled birth attendance: analyses of cross-sectional surveys in 80 low and middle-income countries
Source: Springer Nature journal article supplement (doi:10.1186/s12978-016-0192-2), 2016-06-17
Supplement: MOESM4 [file 10272206]

**Web appendix D:** Distribution of place of delivery and type of professional in countries with at least 10% of home SBA deliveries (Azerbaijan, Cambodia, Indonesia, Iraq, Philippines and Tajikistan) or at least 10% of institutional deliveries by an unskilled worker (Senegal and Togo), by wealth quintile.

| Country         | Wealth quintile | Institutional, SBA |           |         | Home, SBA  |           |         | Institutional, non-SBA |         |         | Home, non-SBA |           |         |
|-----------------|-----------------|--------------------|-----------|---------|------------|-----------|---------|------------------------|---------|---------|---------------|-----------|---------|
|                 |                 | N (%)              | 95% CI    | p value | N (%)      | 95% CI    | p value | N (%)                  | 95% CI  | p value | N (%)         | 95% CI    | p value |
| Azerbaijan 2006 | Q1 (poorest)    | 221 (66.6)         | 61.5-71.7 | <0.001* | 46 (13.9)  | 10.1-17.6 | <0.001  | 3 (0.9)                | 0.1-1.9 | 0.03*   | 62 (18.7)     | 14.5-22.9 | <0.001  |
|                 | Q2              | 260 (74.9)         | 70.4-79.5 |         | 51 (14.7)  | 11.0-18.4 |         | 1 (0.3)                | 0.3-0.9 |         | 35 (10.1)     | 6.9-13.3  |         |
|                 | Q3              | 275 (84.6)         | 80.7-88.5 |         | 27 (8.3)   | 5.3-11.3  |         | 0 (0.0)                | 0.0-1.1 |         | 23 (7.1)      | 4.3-9.9   |         |
|                 | Q4              | 220 (94.0)         | 91.0-97.1 |         | 8 (3.4)    | 1.1-5.8   |         | 0 (0.0)                | 0.0-1.6 |         | 6 (2.6)       | 0.5-4.6   |         |
|                 | Q5 (richest)    | 163 (99.4)         | 98.2-1.0  |         | 1 (0.6)    | 0.6-1.8   |         | 0 (0.0)                | 0.0-2.2 |         | 0 (0.0)       | 0.0-2.2   |         |
| Cambodia 2010   | Q1 (poorest)    | 495 (37.8)         | 35.2-40.4 | <0.001  | 145 (11.1) | 9.4-12.8  | <0.001  | 4 (0.3)                | 0.0-0.6 | 0.40    | 665 (50.8)    | 48.1-53.5 | <0.001* |
|                 | Q2              | 451 (46.7)         | 43.6-49.9 |         | 145 (15.0) | 12.8-17.3 |         | 0 (0.0)                | 0.0-0.4 |         | 369 (38.2)    | 35.2-41.3 |         |
|                 | Q3              | 490 (59.2)         | 55.8-62.5 |         | 141 (17.0) | 14.5-19.6 |         | 3 (0.4)                | 0.0-0.7 |         | 194 (23.4)    | 20.5-26.3 |         |
|                 | Q4              | 629 (73.3)         | 70.3-76.3 |         | 137 (16.0) | 13.5-18.4 |         | 4 (0.5)                | 0.0-0.9 |         | 88 (10.3)     | 8.2-12.3  |         |
|                 | Q5 (richest)    | 899 (88.1)         | 86.2-90.1 |         | 98 (9.6)   | 7.8-11.4  |         | 4 (0.4)                | 0.0-0.8 |         | 19 (1.9)      | 1.0-2.7   |         |
| Indonesia 2012  | Q1 (poorest)    | 866 (26.4)         | 24.9-27.9 | <0.001  | 960 (29.2) | 27.7-30.8 | <0.001  | 6 (0.2)                | 0.0-0.3 | 0.53    | 1453 (44.2)   | 42.5-45.9 | <0.001  |
|                 | Q2              | 1223 (55.0)        | 52.9-57.0 |         | 625 (28.1) | 26.2-30.0 |         | 5 (0.2)                | 0.0-0.4 |         | 372 (16.7)    | 15.2-18.3 |         |

|                     |                 |                |           |         |               |           |        |             |         |       |                |           |        |
|---------------------|-----------------|----------------|-----------|---------|---------------|-----------|--------|-------------|---------|-------|----------------|-----------|--------|
|                     | Q3              | 1326<br>(67.0) | 65.0-69.1 |         | 478<br>(24.2) | 22.2-26.1 |        | 2<br>(0.1)  | 0.0-0.2 |       | 172<br>(8.7)   | 7.5-9.9   |        |
|                     | Q4              | 1473<br>(79.8) | 78.0-81.6 |         | 303<br>(16.4) | 14.7-18.1 |        | 1<br>(0.1)  | 0.0-0.1 |       | 69<br>(3.7)    | 2.9-4.6   |        |
|                     | Q5<br>(richest) | 1388<br>(88.0) | 86.4-89.6 |         | 152<br>(9.6)  | 8.2-11.1  |        | 4<br>(0.3)  | 0.0-0.5 |       | 34<br>(2.2)    | 1.4-2.9   |        |
| Iraq<br>2011        | Q1<br>(poorest) | 2902<br>(63.3) | 61.9-64.6 | <0.001* | 652<br>(14.2) | 13.2-15.3 | 0.071  | 11<br>(0.2) | 0.1-0.4 | 0.001 | 1022<br>(22.3) | 21.1-23.5 | <0.001 |
|                     | Q2              | 2411<br>(73.9) | 72.4-75.4 |         | 473<br>(14.5) | 13.3-15.7 |        | 26<br>(0.8) | 0.5-1.2 |       | 353<br>(10.8)  | 9.8-11.9  |        |
|                     | Q3              | 2063<br>(78.1) | 76.5-79.7 |         | 378<br>(14.3) | 13.0-15.7 |        | 21<br>(0.8) | 0.5-1.2 |       | 179<br>(6.8)   | 5.9-7.8   |        |
|                     | Q4              | 1641<br>(81.2) | 79.5-82.9 |         | 258<br>(12.8) | 11.4-14.3 |        | 8<br>(0.4)  | 0.2-0.8 |       | 113<br>(5.6)   | 4.7-6.7   |        |
|                     | Q5<br>(richest) | 1244<br>(83.9) | 81.9-85.7 |         | 177<br>(11.9) | 10.4-13.7 |        | 5<br>(0.3)  | 0.1-0.8 |       | 57<br>(3.8)    | 3.0-5.0   |        |
| Philippines<br>2013 | Q1<br>(poorest) | 481<br>(35.9)  | 33.3-38.4 | <0.001  | 102<br>(7.6)  | 6.2-9.0   | <0.001 | 1<br>(0.1)  | 0.1-0.2 | 0.269 | 757<br>(56.5)  | 53.8-59.1 | <0.001 |
|                     | Q2              | 550<br>(58.8)  | 55.7-62.0 |         | 119<br>(12.7) | 10.6-14.9 |        | 1<br>(0.1)  | 0.1-0.3 |       | 265<br>(28.3)  | 25.5-31.2 |        |
|                     | Q3              | 612<br>(73.3)  | 70.3-76.3 |         | 96<br>(11.5)  | 9.3-13.7  |        | 2<br>(0.2)  | 0.1-0.6 |       | 125<br>(15.0)  | 12.5-17.4 |        |
|                     | Q4              | 583<br>(86.9)  | 84.3-89.4 |         | 49<br>(7.3)   | 5.3-9.3   |        | 3<br>(0.5)  | 0.1-1.0 |       | 36<br>(5.4)    | 3.7-7.1   |        |
|                     | Q5<br>(richest) | 443<br>(93.3)  | 91.0-95.5 |         | 18<br>(3.8)   | 2.1-5.5   |        | 0<br>(0.0)  | 0.0-0.8 |       | 14<br>(3.0)    | 1.4-4.5   |        |
| Tajikistan<br>2012  | Q1<br>(poorest) | 325<br>(58.9)  | 54.8-63.0 | <0.001  | 91<br>(16.5)  | 13.4-19.6 | <0.001 | 3<br>(0.5)  | 0.1-1.2 | 0.791 | 133<br>(24.1)  | 20.5-27.7 | <0.001 |
|                     | Q2              | 424<br>(69.2)  | 65.5-72.8 |         | 104<br>(17.0) | 14.0-20.0 |        | 2<br>(0.3)  | 0.2-0.8 |       | 83<br>(13.5)   | 10.8-16.3 |        |
|                     | Q3              | 503<br>(78.7)  | 75.5-82.0 |         | 84<br>(13.2)  | 10.5-15.8 |        | 2<br>(0.3)  | 0.1-1.0 |       | 50<br>(7.8)    | 5.7-9.9   |        |

|                 |                 |               |           |        |             |         |       |               |               |        |               |           |        |
|-----------------|-----------------|---------------|-----------|--------|-------------|---------|-------|---------------|---------------|--------|---------------|-----------|--------|
|                 | Q4              | 557<br>(88.6) | 86.1-91.0 |        | 33<br>(5.3) | 3.5-7.0 |       | 4<br>(0.6)    | 0.0-1.3       |        | 35<br>(5.6)   | 3.8-7.4   |        |
|                 | Q5<br>(richest) | 697<br>(91.5) | 89.5-93.5 |        | 40<br>(5.3) | 3.7-6.8 |       | 2<br>(0.3)    | 0.1-0.6       |        | 23<br>(3.0)   | 1.8-4.2   |        |
| Senegal<br>2014 | Q1<br>(poorest) | 421<br>(30.1) | 27.7-32.5 | <0.001 | 12<br>(0.9) | 0.4-1.3 | 0.16  | 239<br>(17.1) | 15.1-<br>19.1 | <0.001 | 727<br>(52.0) | 49.3-54.6 | <0.001 |
|                 | Q2              | 497<br>(44.8) | 41.8-47.7 |        | 7<br>(0.6)  | 0.2-1.1 |       | 265<br>(23.9) | 21.4-<br>26.4 |        | 341<br>(30.7) | 28.0-33.4 |        |
|                 | Q3              | 533<br>(64.7) | 61.4-68.0 |        | 7<br>(0.9)  | 0.2-1.5 |       | 194<br>(23.5) | 20.6-<br>26.4 |        | 90<br>(10.9)  | 8.8-13.1  |        |
|                 | Q4              | 377<br>(79.2) | 75.5-82.9 |        | 5<br>(1.1)  | 0.1-2.0 |       | 66<br>(13.9)  | 10.8-<br>17.0 |        | 28<br>(5.9)   | 3.8-8.0   |        |
|                 | Q5<br>(richest) | 263<br>(80.7) | 76.4-85.0 |        | 7<br>(2.2)  | 0.6-3.7 |       | 48<br>(14.7)  | 10.9-<br>18.6 |        | 8<br>(2.5)    | 0.8-4.1   |        |
| Togo<br>2013    | Q1<br>(poorest) | 341<br>(27.5) | 25.0-30.0 | <0.001 | 1<br>(0.1)  | 0.1-0.2 | 0.063 | 217<br>(17.5) | 15.4-<br>19.6 | <0.001 | 681<br>(54.9) | 52.1-57.7 | <0.001 |
|                 | Q2              | 332<br>(38.3) | 35.1-41.5 |        | 2<br>(0.2)  | 0.1-0.6 |       | 198<br>(22.9) | 20.2-<br>25.8 |        | 334<br>(38.6) | 35.4-41.9 |        |
|                 | Q3              | 457<br>(55.2) | 51.7-58.5 |        | 1<br>(0.1)  | 0.1-0.4 |       | 198<br>(23.9) | 21.1-<br>26.9 |        | 172<br>(20.8) | 18.1-23.6 |        |
|                 | Q4              | 590<br>(88.2) | 85.7-90.6 |        | 3<br>(0.5)  | 0.1-1.0 |       | 46<br>(6.9)   | 5.0-8.8       |        | 30<br>(4.5)   | 2.9-6.1   |        |
|                 | Q5<br>(richest) | 609<br>(95.1) | 93.3-96.7 |        | 5<br>(0.8)  | 0.1-1.5 |       | 15<br>(2.3)   | 1.2-3.5       |        | 12<br>(1.9)   | 0.8-2.9   |        |

\* p value for chi-square test for linear trend; SBA: skilled birth attendant
